# Supplementary material for: Population-based case–control study of the effect of sun glare on pedestrian fatalities in Taiwan
Source: PubMed Central journal article supplement — BMJ Open. 2019 Aug 27;9(8):e028350. doi: 10.1136/bmjopen-2018-028350 (PMC6720250; doi:10.1136/bmjopen-2018-028350), 2019-08-27
Supplement: bmjopen-2018-028350.draft_revisions.pdf [file bmjopen-2018-028350.draft_revisions.pdf]

# BMJ Open

BMJ Open is committed to open peer review. As part of this commitment we make the peer review history of every article we publish publicly available.

When an article is published we post the peer reviewers' comments and the authors' responses online. We also post the versions of the paper that were used during peer review. These are the versions that the peer review comments apply to.

The versions of the paper that follow are the versions that were submitted during the peer review process. They are not the versions of record or the final published versions. They should not be cited or distributed as the published version of this manuscript.

BMJ Open is an open access journal and the full, final, typeset and author-corrected version of record of the manuscript is available on our site with no access controls, subscription charges or pay-per-view fees (<http://bmjopen.bmj.com>).

If you have any questions on BMJ Open's open peer review process please email [info.bmjopen@bmj.com](mailto:info.bmjopen@bmj.com)

# BMJ Open

## A population-based case-control study of the effect of sun glare on pedestrian fatalities in Taiwan

|                               |                                                                                               |
|-------------------------------|-----------------------------------------------------------------------------------------------|
| Journal:                      | <i>BMJ Open</i>                                                                               |
| Manuscript ID                 | bmjopen-2018-028350                                                                           |
| Article Type:                 | Research                                                                                      |
| Date Submitted by the Author: | 04-Dec-2018                                                                                   |
| Complete List of Authors:     | Pai, Chih-Wei; Taipei Medical University, Graduate Institute of Injury Prevention and Control |
| Keywords:                     | ACCIDENT & EMERGENCY MEDICINE, PUBLIC HEALTH, EPIDEMIOLOGY                                    |
|                               |                                                                                               |

SCHOLARONE™  
Manuscripts

1  
2  
3  
4 **1 A population-based case-control study of the effect of sun glare on pedestrian**  
5  
6  
7 **2 fatalities in Taiwan**  
8  
9

10 Chih-Wei Pai<sup>a</sup> \*

11  
12  
13 <sup>a</sup> Graduate Institute of Injury Prevention and Control, College of Public Health, Taipei  
14  
15  
16 Medical University, Taiwan ROC  
17

18  
19 \* Corresponding author  
20

21  
22 Email: [cpai@tmu.edu.tw](mailto:cpai@tmu.edu.tw)  
23

24  
25 +886 02-27361661 ext.6575  
26

27  
28 Address: Graduate Institute of Injury Prevention and Control, College of Public  
29

30  
31 Health, Taipei Medical University, 250 Wuxing St, Taipei City, Taiwan 110.  
32  
33

34  
35  
36  
37 **Word count: 4416**  
38  
39

40  
41  
42  
43 **Abstract**  
44

45  
46 **Introduction**  
47

48  
49 Sun glare poses serious driving hazards and increases accident risks. Relatively few  
50  
51  
52 studies, however, have been conducted to examine the effects of sun glare on  
53  
54  
55 pedestrian fatalities, given that an accident has occurred.  
56

57  
58 **Objectives**  
59  
60

1  
2  
3  
4 20 The primary objective of this study was to investigate the effect of sun glare on  
5  
6  
7 21 pedestrian fatalities.  
8  
9

## 10 22 **Methods**

11  
12  
13 23 Using the Taiwan National Traffic Crash Data and sunrise and sunset data from the  
14  
15  
16 24 National Oceanic and Atmospheric Association (NOAA) for the period 2003–2016,  
17  
18  
19 25 this study investigated whether sun glare results in pedestrian fatalities resulting from  
20  
21  
22 26 motor vehicle crashes. Pedestrian crashes were classified into glare-related (case) and  
23  
24  
25 27 nonglare-related crashes (control). To account for unobserved heterogeneity, mixed  
26  
27  
28 28 logit models were estimated to identify the determinants of pedestrian fatalities  
29  
30  
31 29 specifically in sun-glare-related crashes.  
32  
33

## 34 30 **Results**

35  
36  
37 31 Of the 100,411 pedestrians involved in crashes during 2003–2016, 13,355 and 87,056  
38  
39  
40 32 cases of glare-related and nonglare-related crashes, respectively, were reported.  
41  
42  
43 33 Pedestrians involved in glare crashes tended to be more fatally injured than those in  
44  
45  
46 34 nonglare crashes. Other contributory factors to fatal injuries among pedestrians were  
47  
48  
49 35 older pedestrians, male drivers, older drivers, intoxicated motorists, rural roadways,  
50  
51  
52 36 car overtaking manoeuvres, a heavy vehicle as the crash partner, and sunset hours.  
53  
54  
55 37 Walking against traffic appeared to be beneficial in decreasing injury severity.  
56  
57

## 58 38 **Conclusions**

1  
2  
3  
4 39 Sun glare was associated with pedestrian fatalities. Older pedestrians, male drivers,  
5  
6  
7 40 older drivers, and intoxicated motorists were prevalent determinants of pedestrian  
8  
9  
10 41 fatalities in glare-related crashes.  
11  
12

13 42 **Keywords:** Sun glare; Pedestrian fatalities; Crashes; Injury  
14  
15

16 43

#### 19 44 **Strengths and limitations of this study**

- 22 45 ● This is a comprehensive study using the linked data from the two datasets.
- 23  
24 46 ● Our results derived from the linked datasets can be more reliable than those  
25  
26  
27  
28 47 using a single database alone.
- 29  
30  
31 48 ● Limitations of this study include the data that are unavailable from the two  
32  
33  
34 49 datasets such as geographic characteristics.  
35  
36

37 50

38  
39  
40 51

#### 43 52 **Introduction**

44  
45  
46 53

47  
48  
49 54 Driving is a highly visual task that involves visual function and processing for  
50  
51  
52 55 establishing the effective control over a vehicle.<sup>1</sup> Research<sup>2 3</sup> has suggested that bright  
53  
54  
55 56 sunlight was ideal for driving because it increases the contrast, resolution, and  
56  
57  
58 57 luminosity of the surrounding landscapes. As a result, drivers may misinterpret the  
59  
60

1  
2  
3  
4 58 speed at which the surrounding landscape is approaching and gauge their travel  
5  
6  
7 59 velocity to be illusively slow, which would in turn prompt drivers to compensate by  
8  
9  
10 60 accelerating.<sup>4,5</sup>  
11  
12

13 61 Generally, bright sunlight causes temporary blindness when the sun is at a  
14  
15  
16 62 relatively low altitude and its rays fall directly in an individual's line of sight (e.g.,  
17  
18  
19 63 just after sunrise or before sunset when the sun is above the horizon). By using a  
20  
21  
22 64 simulator, Gray and Regan<sup>6</sup> assessed the driving performance in both the absence and  
23  
24  
25 65 presence of a simulated low sun. They reported that sun glare resulted in a significant  
26  
27  
28 66 reduction in the safety margin accepted by drivers; the mean number of crashes was  
29  
30  
31 67 significantly higher during conditions of glare than during those of without glare, and  
32  
33  
34 68 older drivers exhibited a significantly greater reduction in the safety margin than did  
35  
36  
37 69 younger drivers. Another simulation study was conducted by Theeuwes et al.<sup>7</sup>, who  
38  
39  
40 70 reported that low glare sources resulted in participants (drivers) exhibiting a  
41  
42  
43 71 significant drop in the ability to detect simulated pedestrians along the roadside.  
44  
45  
46 72 Theeuwes et al.<sup>7</sup> also pointed out that older participants reduced their driving speed  
47  
48  
49 73 the most and exhibited the largest drop in successful pedestrian detection.  
50  
51

52 74 Churchill et al.<sup>8</sup> employed a geometric model for examining whether sun glare  
53  
54  
55 75 affects the speeds of drivers on roadways and concluded that changes in speed as a  
56  
57  
58 76 result of sun glare was a factor in highway congestion. Jurado-Piña and Pardillo  
59  
60

1  
2  
3  
4 77 Mayora<sup>9</sup>, in an attempt to investigate the maximum tolerable sun glare caused by the  
5  
6  
7 78 angle between the sun and driving direction, pointed out that glare occurs when there  
8  
9  
10 79 is a specific angular distance between the driver's line of sight and the sun; this  
11  
12  
13 80 angular distance is 19° for a 40-year-old driver and 25 ° for a 60-year-old driver.  
14  
15  
16 81 Anue<sup>10</sup> suggested that in general no sun glare occurs if the angular distance is greater  
17  
18  
19 82 than 25°.

22 83 Several studies have investigated whether a direct relationship exists between sun  
23  
24  
25 84 glare and crashes by using data from police report or hospital. In a longitudinal study  
26  
27  
28 85 of patients who had been hospitalised as a consequence of a motor-vehicle crash,  
29  
30  
31 86 Redelmeier and Raza<sup>11</sup> concluded that bright sunlight was associated with an  
32  
33  
34 87 increased risk of life-threatening motor-vehicle crashes in Canada. By analysing  
35  
36  
37 88 police-reported crash data from Arizona, Mitra and Washington<sup>12</sup> indicated that sun  
38  
39  
40 89 glare was a crucial omitted variable that could explain intersection crash occurrence  
41  
42  
43 90 and that including this variable improved the explanatory power of statistical models.  
44  
45  
46 91 By linking police-reported crash data from Arizona with sunrise and sunset data from  
47  
48  
49 92 NOAA, Mitra<sup>3</sup> concluded that the odds of glare causing a crash were higher at  
50  
51  
52 93 intersections with roadways running eastbound and westbound than at those running  
53  
54  
55 94 northbound and southbound. Mitra<sup>3</sup> further indicated that rear-end and angle crashes  
56  
57  
58 95 at signalised intersections were affected by sun glare, and, furthermore, the severity of  
59  
60

1  
2  
3  
4 96 motorist injury was unaffected by sun glare. A study that analysed traffic-accident  
5  
6  
7 97 database of Chiba, Japan, Hagita and Mori<sup>13</sup> revealed a higher occurrence of crashes  
8  
9  
10 98 involving pedestrians or bicycles at intersections where the sun was below 45° above  
11  
12  
13 99 the horizon in the driving direction. Sun et al.<sup>14</sup>, who analysed police-reported crash  
14  
15  
16 100 data in Edmonton, Canada, reported similar findings, concluding that sun glare  
17  
18  
19 101 significantly contributed to crash occurrence, especially at intersections. Furthermore,  
20  
21  
22 102 they also indicated that the effect of sun glare on crash occurrence during the  
23  
24  
25 103 mornings on eastbound roads and evenings on westbound roads was significantly  
26  
27  
28 104 greater during the spring and autumn months and that certain crash types (e.g., crashes  
29  
30  
31 105 related to signal violation, failure to yield to pedestrians/cyclists, improper turning,  
32  
33  
34 106 and lane changing) were more likely to occur during periods of sun glare. By  
35  
36  
37 107 analysing police-reported crash data, Choi and Singh<sup>15</sup> pointed out that elderly  
38  
39  
40 108 motorists tended to have a greater propensity for striking other vehicles in conditions  
41  
42  
43 109 of sun glare, especially on roadways that were not physically divided.

44  
45  
46 110 Based on our literature review, a significant gap remains in the comprehensive  
47  
48  
49 111 understanding of the relationship between sun glare and pedestrian fatalities,  
50  
51  
52 112 conditioned on that a pedestrian crash has occurred. The primary research hypothesis  
53  
54  
55 113 of the present study is that pedestrian injury severity increases in accordance with  
56  
57  
58 114 restricted visibility (i.e., sun glare). As a result, the primary aim of this study was to  
59  
60



1  
2  
3  
4 115 investigate whether sun glare is associated with pedestrian fatalities. This study also  
5  
6  
7 116 aimed to investigate the determinants of pedestrian fatalities specifically in crashes  
8  
9  
10 117 related to sun glare.

11  
12  
13 118

## 16 119 **Materials and Methods**

### 19 120 *Data source*

22 121 By using the Taiwan National Traffic Crash Data as well as sunrise and sunset data  
23  
24  
25 122 from the National Oceanic and Atmospheric Association (NOAA) for the period from  
26  
27  
28 123 2003 to 2016 (National Oceanic Earth System Research Laboratory and Atmospheric  
29  
30  
31 124 Administration<sup>16</sup>. Accessed: 2018-08-22), the current study examined the effect of  
32  
33  
34 125 sun glare on pedestrian fatalities, given that an accident involving a vehicle and  
35  
36  
37 126 pedestrian has occurred. The Taiwan National Traffic Crash Data comprise two files:  
38  
39  
40 127 an accident file and a vehicle and victim file. Accident files contain general  
41  
42  
43 128 information on the times and dates of crashes; weather, road; and lighting conditions,  
44  
45  
46 129 and road type. Vehicle and victim files contain vehicle-related information, such  
47  
48  
49 130 vehicle type, manoeuvres, first point of impact, and orientation, as well as driver and  
50  
51  
52 131 casualty characteristics, such as age, sex, and injury severity. Injury severity is  
53  
54  
55 132 classified into two levels: fatality and injury. Victims who die within 24 h as a result  
56  
57  
58 133 of an accident are classified as cases of fatality, whereas victims who sustain injuries,

1  
2  
3  
4 134 whether mild or severe, are classified as cases of injury.  
5  
6

7 135 Data on daily sunrise and sunset times and orientation are available from the  
8  
9  
10 136 NOAA. The information on the sunrise and sunset orientation for Taiwan is presented  
11  
12  
13 137 in online supplementary appendix 1. By using the data on the temporal characteristics  
14  
15  
16 138 (i.e., time and date) and orientation of vehicle crashes from the Taiwan National  
17  
18  
19 139 Traffic Crash Data, pedestrian crashes were matched with the sunrise and sunset data  
20  
21  
22 140 of the NOAA and subsequently classified into glare-related or nonglare-related  
23  
24  
25 141 crashes.  
26  
27

28 142

29  
30  
31 143 A glare-related crash is defined as a crash in which the following conditions are  
32  
33  
34 144 satisfied: the car was travelling in a direction towards the sunrise or sunset, and the  
35  
36  
37 145 angular distance between the driver's line of sight and the sun was between  $0^{\circ}$  and  
38  
39  
40 146  $45^{\circ}$ . The angular distances were adjusted according to the time of the crash (available  
41  
42  
43 147 from the National Traffic Crash Dataset) and daily sunrise and sunset times daily  
44  
45  
46 148 (available from the NOAA). For example, a crash in which a car driver headed  
47  
48  
49 149 northeast collided with a pedestrian at 06:18 (A.M.) on 18 June, 2016, was classified  
50  
51  
52 150 as a glare-related crash. Notably, the angular distances, ranging from  $0^{\circ}$  to  $45^{\circ}$ , were  
53  
54  
55 151 reported<sup>13</sup> to cause sun glare and potentially affect on traffic safety. We therefore  
56  
57  
58 152 adopted the angular distance, range of  $0-45^{\circ}$ , as the threshold for defining a  
59  
60

1  
2  
3  
4 153 glare-related crash.  
5  
6

7 154 A flow-chart of the sample selection from the Taiwan Traffic Crash Dataset for the  
8  
9  
10 155 period from 2003 to 2016 is presented in online supplementary Appendix 2. A total of  
11  
12  
13 156 195,258 pedestrian casualties from traffic crashes were extracted from during this  
14  
15  
16 157 period. This study focused on pedestrian crashes where the crash partner was a  
17  
18  
19 158 motorcycle, car, taxi, heavy-goods vehicle, bus, or coach. Crashes that occurred  
20  
21  
22 159 during adverse weather conditions, such as rain or fog, were excluded (n = 45,712). A  
23  
24  
25 160 total of 917 cases had missing data with regard to accident date and time and vehicle  
26  
27  
28 161 orientation. Because these cases (adverse weather conditions and missing data) were  
29  
30  
31 162 not mutually exclusive, the total number of cases excluded was 45,365, yielding a  
32  
33  
34 163 total of 149,839 valid cases for pedestrian casualties. These valid cases were matched  
35  
36  
37 164 with the NOAA sunrise and sunset data. After excluding crashes that had occurred  
38  
39  
40 165 before sunrise and after sunset (n = 49,428), 100,411 cases of pedestrian casualties  
41  
42  
43 166 remained. Of the 100,411 pedestrians that were matched with the sunrise and sunset  
44  
45  
46 167 data from the NOAA, 13,355 were glare-related cases (treated as cases), and 87,056  
47  
48  
49 168 were nonglare-related cases (treated as controls), respectively.

50  
51 169

52 170

53 171

54 172

55 173

56 174

1  
2  
3  
4 175 *Definition of variables*  
5  
6

7 176  
8  
9

10 177 The following demographic data were collected for casualties: sex, age (four  
11  
12  
13 178 groups: <18, 18–40, 41–64, and  $\geq 65$  years), alcohol use (yes: breathalyser test results  
14  
15  
16 179  $\geq 0.15$  mL/L or blood-alcohol consumption [BAC] level  $> 0.03\%$ ; no: breathalyser  
17  
18  
19 180 test results  $< 0.15$  mL/L or BAC level  $\leq 0.03\%$ ), licence status (licensed: with a valid  
20  
21  
22 181 licence; or unlicensed: without a valid licence), and pedestrian crossing manner  
23  
24  
25 182 (facing traffic: pedestrians walking towards traffic; back to traffic: pedestrians  
26  
27  
28 183 walking back to the traffic; crossing: pedestrians crossing the street). In Taiwan, those  
29  
30  
31 184 under the age 18 are identified as teenagers who are unable to legally ride motorcycles  
32  
33  
34 185 or drive car. Those aged 65 years or older were identified as the elderly individual.  
35  
36  
37 186 For individuals aged 18–40 and 41–64, we classified the remaining ages into two even  
38  
39  
40 187 age intervals. BAC data were obtained by police who conducted breathalyser tests or  
41  
42  
43 188 followed up for blood tests at hospitals. According to Taiwanese law, drivers with  
44  
45  
46 189 either breathalyser test  $\geq 0.15$  mL/L or BAC level  $> 0.03\%$  were considered to be  
47  
48  
49 190 drunk-driving. Data from breathalyser tests or BAC levels were available only for  
50  
51  
52 191 motorists not for pedestrians because, by law, only motorists involved in crashes are  
53  
54  
55 192 mandated to be tested for alcohol consumption.  
56  
57

58 193 The vehicle attribute considered was the crash partner (motorcycle, car, taxi, and  
59  
60

1  
2  
3  
4 194 heavy vehicles such as buses and coaches). The following road factors were  
5  
6  
7 195 considered: sun glare (yes: affected by sun glare; no: unaffected by sun glare) and  
8  
9  
10 196 crash location (rural: roadways with speed limits of  $\geq 51$ km/h, and urban: roadways  
11  
12  
13 197 with speed limits of  $\leq 50$ km/h). Two temporal factors, month of the crash  
14  
15  
16 198 (spring/summer: March–August or autumn/winter: September–February) and days of  
17  
18  
19 199 crash (weekday: Monday–Friday or weekend: Saturday–Sunday) were examined.  
20  
21

22 200

23  
24  
25 201 *Statistical analysis*  
26  
27

28 202

29  
30  
31 203 The distribution of pedestrian injury severity according to a set of variables (e.g.,  
32  
33  
34 204 human attributes, environmental factors, and vehicle characteristics) is reported in this  
35  
36  
37 205 study. Chi-square tests were conducted to examine the association between the  
38  
39  
40 206 independent variables and pedestrian injury severity. Because the dependent variable  
41  
42  
43 207 was binary (fatal vs. injury), the binary mixed logit models, which allow parameter  
44  
45  
46 208 coefficients to have distribution rather than fixed across the individuals, were  
47  
48  
49 209 estimated. Using the chi-square tests, the variables discovered to be significantly  
50  
51  
52 210 associated with the outcome ( $p < 0.2$ ) were then incorporated into the multivariate  
53  
54  
55 211 mixed logit models. To detect the multi-collinearity among the variables (all  
56  
57  
58 212 categorical), a chi-square independent test was conducted and Cramer's  $V^{17}$  was  
59  
60

1  
2  
3  
4 213 estimated. To determine whether sun glare was associated with pedestrian fatalities,  
5  
6  
7 214 one overall model that includes sun glare as one of the variables was utilised. One  
8  
9  
10 215 additional model was subsequently estimated to investigate the determinants of  
11  
12  
13 216 pedestrian fatalities, specifically in sun-glare-related crashes.

16 217 Mixed logit models were estimated to account for unobserved heterogeneity that  
17  
18  
19 218 may have arisen as a consequence of unmeasured variables, such as risk perception,  
20  
21  
22 219 behavioural factors, and other socioeconomic factors not available in the crash data  
23  
24  
25 220 from police reports. One example of a behavioural factor is distraction by phone use  
26  
27  
28 221 that may result in risk-taking inclinations and consequently an increased risk of  
29  
30  
31 222 injury.<sup>18 19</sup> Ignoring the effects of unobserved variables may lead to inconsistent  
32  
33  
34 223 estimates in non-linear models.<sup>20</sup>

37 224 In the present study, the utility of the injury severity  $i$  for a crash  $n$  is defined as  
38  
39  
40 225 follows:

43 226 
$$IS_{in} = \beta_n^i X_{in} + \varepsilon_{in} \quad \text{Eq. (1)}$$

46 227  
47  
48  
49 228 where  $IS_{in}$  is an injury-severity function determining the injury-severity category  $n$   
50  
51  
52 229 (fatal or injury) for an individual pedestrian  $i$ ,  $X_{in}$  is a vector of the observed  
53  
54  
55 230 variables, such as pedestrian and driver attributes, vehicle characteristics, and  
56  
57  
58 231 environmental or temporal variables,  $\beta_n$  is a vector of the parameters associated  
59  
60

1  
2  
3  
4 232 with  $X_{in}$ , and  $\varepsilon_{in}$  is the error term. The mixed logit model uses  $\beta_n$  as a vector of  
5  
6  
7 233 estimable parameters for the discrete outcome  $n$ , which varies across the observed  
8  
9  
10 234 pedestrians. The variation is observed with density  $f(\beta|\theta)$ , where  $\theta$  is a vector of  
11  
12  
13 235 the parameters of the density distribution. In most applications, mixed models specify  
14  
15  
16 236 that the density  $f$  has a continuous distribution, such as a normal, lognormal,  
17  
18  
19 237 triangular, or uniform distribution.

20  
21  
22 238 Given error terms that are independent and identically Gumbel distributed<sup>21</sup>, the  
23  
24  
25 239 unconditional probability of one alternative  $n$  (from the set of injury-severity  
26  
27  
28 240 categories  $I$ ) is the integral of the conditional probability with a multinomial logit  
29  
30  
31 241 form over the parameter  $\beta$  of density  $f$ :

$$242 \quad P_{in} = \int \left( \frac{\exp(\beta' X_{in})}{\sum_l \exp(\beta' X_{il})} \right) f(\beta|\theta) d\beta \quad \text{Eq. (2)}$$

32  
33  
34  
35  
36  
37  
38  
39 243  
40  
41 244 All parameters are first assumed to be random and then their estimated standard  
42  
43  
44 245 deviations are evaluated using a zero-based (asymptotic)  $t$ -test for each parameter.  
45  
46  
47 246 One study<sup>20</sup> pointed out that a simulation-based maximum likelihood with 200 Halton  
48  
49  
50 247 draws may provide a more efficient distribution of draws for numerical integration  
51  
52  
53 248 and requires fewer draws to achieve convergence. Attempts were made in the present  
54  
55  
56 249 study to obtain more significant results by increasing the number of Halton draws, and  
57  
58  
59 250 the results appeared stable with the use of 1000 Halton draws.

1  
2  
3  
4 **251 Results**  
5  
6

7 **252**  
8  
9

10 **253** Table 1 lists the distribution of pedestrian injury severity according to a set of  
11  
12  
13 **254** variables. Of the 13,355 glare-related cases, 329 pedestrians (2.46%) sustained fatal  
14  
15  
16 **255** injuries, which is higher than those in nonglare-related crashes (1.83%). Additionally,  
17  
18  
19 **256** the majority of pedestrian crashes involved motorists with valid licences (85.65%),  
20  
21  
22 **257** sober motorists (85.97%), urban roadways (89.57%), pedestrians who were hit while  
23  
24  
25 **258** crossing the street (65.85%), and nonglare conditions (86.70%) and occurred on  
26  
27  
28 **259** weekdays (74.83%).  
29

30 **260**

31 **261** Table 1: Distribution of pedestrian injury severity according to a set of variables for  
32  
33 **262** the period 2003–2016.  
34

|                   | N            | Fatal<br>n(%) | Injury<br>n(%) | $\chi^2$ test<br>p-value |
|-------------------|--------------|---------------|----------------|--------------------------|
| Total             | 100411       | 1925(1.92)    | 98486(98.08)   |                          |
| Sun glare         |              |               |                |                          |
| Yes               | 13355(13.30) | 329(2.46)     | 13026(97.54)   | <0.01                    |
| No                | 87056(86.70) | 1596(1.83)    | 85460(98.17)   |                          |
| Pedestrian gender |              |               |                |                          |
| Male              | 50942(50.73) | 1015(1.99)    | 49927(98.01)   | 0.08                     |
| Female            | 49469(49.27) | 910(1.84)     | 48559(98.16)   |                          |
| Driver gender     |              |               |                | <0.01                    |
| Male              | 53351(53.13) | 1132(2.12)    | 52219(97.88)   |                          |
| Female            | 47060(46.87) | 793(1.69)     | 46267(98.31)   |                          |
| Pedestrian age    |              |               |                |                          |
| <18               | 3644(3.63)   | 67(1.84)      | 3577(98.16)    | <0.01                    |
| 18-40             | 25851(25.75) | 154(0.60)     | 25697(99.40)   |                          |
| 41-64             | 31283(31.15) | 352(1.13)     | 30931(98.87)   |                          |
| ≥65               | 39633(39.47) | 1352(3.41)    | 38281(96.59)   |                          |



|                               | N            | Fatal<br>n(%) | Injury<br>n(%) | $\chi^2$ test<br>p-value |
|-------------------------------|--------------|---------------|----------------|--------------------------|
| <b>Driver age</b>             |              |               |                |                          |
| <18                           | 4458(4.44)   | 103(2.31)     | 4355(97.69)    | <0.01                    |
| 18-40                         | 25808(25.70) | 295(1.14)     | 25513(98.86)   |                          |
| 41-64                         | 32523(32.39) | 474(1.46)     | 32049(98.54)   |                          |
| $\geq 65$                     | 37622(37.47) | 1033(2.75)    | 36589(97.25)   |                          |
| <b>Driver licence</b>         |              |               |                |                          |
| Licensed                      | 86007(85.65) | 1609(1.87)    | 84398(98.13)   | 0.01                     |
| Unlicensed                    | 14404(14.35) | 316(2.19)     | 14088(97.81)   |                          |
| <b>Alcohol use for driver</b> |              |               |                |                          |
| No                            | 86322(85.97) | 1512(1.75)    | 84810(98.25)   | <0.01                    |
| Yes                           | 14089(14.03) | 413(2.93)     | 13676(97.07)   |                          |
| <b>Months</b>                 |              |               |                |                          |
| Spring/summer                 | 47671(47.48) | 914(1.92)     | 46757(98.08)   | 0.99                     |
| Autumn/winter                 | 52740(52.52) | 1011(1.92)    | 51729(98.08)   |                          |
| <b>Crash location</b>         |              |               |                |                          |
| Rural                         | 10475(10.43) | 352(3.36)     | 10123(96.64)   | <0.01                    |
| Urban                         | 89936(89.57) | 1573(1.75)    | 88363(98.25)   |                          |
| <b>Crash partner</b>          |              |               |                |                          |
| Motorcycle                    | 33221(33.09) | 643(1.94)     | 32578(98.06)   | <0.01                    |
| Car                           | 45963(45.77) | 801(1.74)     | 45162(98.26)   |                          |
| Taxi                          | 9655(9.62)   | 208(2.15)     | 9447(97.85)    |                          |
| Heavy vehicles                | 11572(11.52) | 356(3.08)     | 11216(96.92)   |                          |
| <b>Pedestrian's movement</b>  |              |               |                |                          |
| Facing traffic                | 9704(9.66)   | 172(1.77)     | 9532(98.23)    | <0.01                    |
| Back to traffic               | 24584(24.48) | 623(2.53)     | 23961(97.47)   |                          |
| Crossing                      | 66123(65.85) | 1130(1.71)    | 64993(98.29)   |                          |
| <b>Car's manoeuvre</b>        |              |               |                |                          |
| Straight                      | 50836(50.63) | 862(1.70)     | 49974(98.30)   | <0.01                    |
| Changing lane                 | 15625(15.56) | 257(1.64)     | 15368(98.36)   |                          |
| Overtaking                    | 21339(21.25) | 601(2.82)     | 20738(97.18)   |                          |
| Turning                       | 12611(12.56) | 205(1.63)     | 12406(98.37)   |                          |
| <b>Weekdays</b>               |              |               |                |                          |
| Weekday                       | 70366(70.08) | 1267(1.80)    | 69099(98.20)   | <0.01                    |
| Weekend                       | 30045(29.92) | 658(2.19)     | 29387(97.81)   |                          |

263

264 Using chi-square tests, the following variables were determined to be significantly

265 associated with the outcome: sun glare; pedestrian and driver sex and age; driver  
 266 license possession, alcohol consumption; crash month, location, and partner;  
 267 pedestrian movement; car manoeuvre; and day of the week. These factors were then  
 268 incorporated into the mixed logit models.

269 Table 2 presents the estimation results of the mixed logit model of pedestrian injury  
 270 severity. Parameters that were determined to be random were those that produced  
 271 statistically significant standard errors for the assumed distributions; in this study,  
 272 random parameters were male motorists and heavy vehicle as crash partners, with a  
 273 uniform distribution that appears to provide the best statistical fit.

274  
 275 Table 2: Mixed logit estimation results for pedestrian injury severity during the period  
 276 2003–2016<sup>a</sup> (n = 100,411).

| Variable                           | Parameter | Standard error | <i>t</i> -value |
|------------------------------------|-----------|----------------|-----------------|
| Fatal injury                       |           |                |                 |
| Fixed parameter                    |           |                |                 |
| Constant                           | −0.531    | 0.215          | −2.47           |
| Sun-glare-related crash            | 0.527     | 0.164          | 3.21            |
| Pedestrians facing traffic         | −0.304    | 0.110          | −2.76           |
| Pedestrians aged 65+               | 0.553     | 0.237          | 2.33            |
| Motorists aged 65+                 | 0.218     | 0.102          | 2.14            |
| Rural roadways                     | 0.985     | 0.251          | 3.92            |
| Intoxicated motorist               | 0.606     | 0.213          | 2.85            |
| Weekend                            | 0.134     | 0.053          | 2.53            |
| Car overtaking manoeuvre           | 0.472     | 0.132          | 3.58            |
| Random parameter                   |           |                |                 |
| Male motorists                     |           |                |                 |
| Standard deviation of distribution | 0.360     | 0.116          | 3.10            |
| Male motorists                     |           |                |                 |

|                                                     |       |       |      |
|-----------------------------------------------------|-------|-------|------|
| Standard deviation of distribution                  | 0.467 | 0.173 | 2.70 |
| Restricted log-likelihood (constant only): -8,116.7 |       |       |      |
| Log-likelihood at convergence: -5,867.2             |       |       |      |
| $\rho^2 = 0.277$                                    |       |       |      |

277 <sup>a</sup> The outcome “injury” is the baseline case with its parameters set at zero.

278

279 Considering the results listed in Table 2, sun-glare-related crashes was found to be  
 280 significant, and the estimated parameter was fixed across the observed pedestrians  
 281 (the standard error for this parameter, when allowed to be random, was statistically  
 282 nonsignificant). The parameter implies that sun a sun-glared-related crash was more  
 283 likely to result in fatal injuries among pedestrians than a nonglare-related crash. Other  
 284 factors discovered to have fixed effects on observed pedestrians and increase the  
 285 likelihood of fatal injuries were pedestrians aged 65 or older, motorists aged 65 years  
 286 or older, rural roadways, intoxicated motorist, weekend, and car overtaking  
 287 manoeuvre.

288 The parameter for the variable of male motorist appeared to be random, with a  
 289 uniform distribution with a mean of 0 and standard deviation of 0.360 (see Table 2),  
 290 indicating that individual pedestrians being struck by male motorists had different  
 291 parameters. Given the estimates (a mean of 0 and standard deviation of 0.360),  
 292 approximately half of all pedestrians have a higher probability of sustaining fatal  
 293 injuries when all other variables remain constant. Another parameter found to have a  
 294 nonlinear effect across the sample of pedestrians was the variable of a heavy vehicle

1  
2  
3  
4 295 as the crash partner (with a uniform distribution). This parameter had a mean of 0 and  
5  
6  
7 296 standard deviation of 0.467 (see Table 2), indicating that individual pedestrians struck  
8  
9  
10 297 by heavy vehicles have different parameters, with half of the distributions resulting in  
11  
12  
13 298 a positive parameter (increasing the likelihood of fatal injuries) and half resulting in  
14  
15  
16 299 negative parameter (decreasing the likelihood of fatal injuries). The non-uniformity of  
17  
18  
19 300 the effects of male motorists and heavy vehicles is likely a consequence of other  
20  
21  
22 301 unmeasured factors, such as driver experiences; for some male drivers or more  
23  
24  
25 302 experienced drivers operating heavy vehicles (factors would reduce the effect of sun  
26  
27  
28 303 glare), injuries sustained by pedestrians were likely to be minor once a crash had  
29  
30  
31 304 occurred.

32  
33  
34 305 The movement of pedestrians towards traffic was also discovered to be  
35  
36  
37 306 significantly affect pedestrian fatalities. This fixed parameter suggests that pedestrians  
38  
39  
40 307 who faced traffic while walking were less likely to sustain fatal injuries than those  
41  
42  
43 308 undertaking other movements, such as walking back to traffic or crossing the street.

44  
45  
46 309 Table 3 presents the estimation results of the mixed logit model of pedestrian injury  
47  
48  
49 310 severity specifically in sun-glare-related crashes. For this model, the only random  
50  
51  
52 311 parameter (with a uniform distribution) was significant for the variable of heavy  
53  
54  
55 312 vehicle as the crash partner. The heterogeneous effect indicates that certain crashes  
56  
57  
58 313 involving heavy vehicles were associated with both higher and lower likelihoods of  
59  
60

1  
2  
3  
4 314 pedestrians sustaining fatal injuries. We speculate that this heterogeneous effect may  
5  
6  
7 315 be caused by variance in the experience level among certain driver groups, with more  
8  
9  
10 316 experienced drivers exhibiting a decreased likelihood of causing fatal injuries. In  
11  
12  
13 317 other words, heavy vehicles are normally operated by professional drivers, with the  
14  
15  
16 318 majority of drivers in this group being men and middle-aged or older individuals. To  
17  
18  
19 319 confirm this speculation, the interaction between the variable of heavy vehicle and  
20  
21  
22 320 other variables, such as male and middle-aged or older motorists, were added to the  
23  
24  
25 321 model specification, but were dropped from the model because all were determined to  
26  
27  
28 322 be insignificantly different from zero at the 0.1 level. The heterogeneity identified for  
29  
30  
31 323 the variable of heavy vehicle presented another argument in favour of estimating a  
32  
33  
34 324 mixed logit model of pedestrian injury severity because such effects are difficult to  
35  
36  
37 325 identify when using a logit framework with numerous interaction terms.  
38  
39  
40 326

41 327 Table 3: Mixed logit estimation results for pedestrian injury severity specifically for  
42  
43 328 sun-glare-related crashes during the period 2003–2015<sup>a</sup> (n = 13,355).

| Variable                   | Parameter | Standard error | <i>t</i> -value |
|----------------------------|-----------|----------------|-----------------|
| Fatal injury               |           |                |                 |
| Fixed parameter            |           |                |                 |
| Constant                   | −0.262    | 0.127          | −2.06           |
| Sunset                     | 0.336     | 0.090          | 3.73            |
| Pedestrians facing traffic | −0.417    | 0.112          | −3.72           |
| Pedestrians aged 65+       | 0.510     | 0.183          | 2.79            |
| Motorists aged 65+         | 0.468     | 0.137          | 3.42            |
| Rural roadways             | 0.660     | 0.164          | 4.02            |
| Car overtaking manoeuvre   | 0.367     | 0.107          | 3.43            |

1  
2  
3  
4  
5  
6  
7  
8  
9  
10  
11  
12  
13  
14  
15  
16  
17  
18  
19  
20  
21  
22  
23  
24  
25  
26  
27  
28  
29  
30  
31  
32  
33  
34  
35  
36  
37  
38  
39  
40  
41  
42  
43  
44  
45  
46  
47  
48  
49  
50  
51  
52  
53  
54  
55  
56  
57  
58  
59  
60

Random parameter

Heavy vehicle as crash partner

|                                    |       |       |      |
|------------------------------------|-------|-------|------|
| Standard deviation of distribution | 0.396 | 0.154 | 2.57 |
|------------------------------------|-------|-------|------|

Restricted log-likelihood (constant only): -4,327.2

Log-likelihood at convergence: -3,286.5

$\rho^2 = 0.241$

329 <sup>a</sup> The outcome “injury” is constituted the baseline, with its parameters set at zero

330

331 In this mixed logit model specifically for sun-glare-related crashes, the parameter

332 for the variable sunset was discovered to be significant and fixed across the observed

333 pedestrians. This parameter implies that injuries sustained by pedestrians were more

334 likely to be fatal under sunset conditions than under sunrise conditions. Other fixed

335 and significant factors that increased the likelihood of fatal injuries were pedestrians

336 aged 65 or older, motorists aged 65 or older, rural roadways, and car overtaking

337 manoeuvre. Similar to the overall mixed logit model of pedestrian injury severity,

338 facing traffic in a glare-related crash was determined to be a protective factor in

339 reducing pedestrian fatalities. This fixed parameter suggests that the effect of facing

340 traffic on pedestrian injury severity was uniform across the observed pedestrians.

341

## 342 **Discussions**

343

344 By using the National Traffic Crash Data and sunrise and sunset data from the

345 NOAA, the present study examined whether sun glare was associated with pedestrian

1  
2  
3  
4 346 fatalities involved in motor vehicle crashes. This research may constitute a valuable  
5  
6  
7 347 contribution to the growing literature on pedestrian safety as well as fill a major  
8  
9  
10 348 research gap regarding the effect of sun glare on pedestrian fatalities. Regarding  
11  
12  
13 349 methodological contributions, the proposed models offer methodological flexibility  
14  
15  
16 350 for identifying individual-specific heterogeneity that may arise as a result of other  
17  
18  
19 351 unmeasured factors related to motorist experience, behaviour, and geometric  
20  
21  
22 352 characteristics. When developing intervention strategies for improving pedestrian  
23  
24  
25 353 safety in sun-glare conditions, the heterogeneous effects of certain variables (which  
26  
27  
28 354 cannot be uncovered by using traditional logit models) should be considered.

31 355 The empirical contributions of this research comprise those research findings that  
32  
33  
34 356 are related to the factors affecting pedestrian fatalities. The identification of these risk  
35  
36  
37 357 factors may provide policy-makers with information for establishing suitable policies  
38  
39  
40 358 and strategies that may further reduce the risk of crashes in general or severity in  
41  
42  
43 359 particular. The following findings merit further discussion.

46 360 Most drivers commute during hours of extreme sun glare. It is therefore not  
47  
48  
49 361 surprising that more crashes occurs on roadways where there is a significant portion  
50  
51  
52 362 of traffic during peak morning (sunrise) and afternoon (sunset) hours. The adverse  
53  
54  
55 363 effect of sun glare on crash occurrence has been well documented in relevant  
56  
57  
58 364 literature.<sup>3 14</sup> Mitra<sup>3</sup> pointed out that motorist injury severity, however, was not  
59  
60

1  
2  
3  
4 365 increased in glare conditions, possibly as a consequence of reduced travel speed.<sup>8</sup>  
5  
6  
7 366 Such a protective effect of sun glare on the associated motorist injury severity does  
8  
9  
10 367 not apply to pedestrians; our study concludes that glare conditions (as indicated in the  
11  
12  
13 368 overall model) were associated with pedestrian fatalities. In our study, it is evident  
14  
15  
16 369 that this adverse effect of sun glare was greater on rural roadways where collision  
17  
18  
19 370 impacts can be higher and motorists may not expect to encounter a pedestrian as much  
20  
21  
22 371 as they would on urban roadways. One commonly-adopted engineering measure is the  
23  
24  
25 372 use of variable message signs to warn drivers of the risk of sun glare at the times  
26  
27  
28 373 when and locations (i.e., rural roadways) where sun-glare conditions occur.<sup>9</sup>  
29  
30

31 374 Mitra<sup>3</sup> pointed out that the odds of glare causing crashes at intersections were  
32  
33  
34 375 higher during the morning hours, and in autumn and winter months in Arizona,  
35  
36  
37 376 United States. In our study, the effect of seasons on pedestrian fatalities was not  
38  
39  
40 377 significant. Adding to the research conducted by Hagita and Mori<sup>22</sup>, who concluded  
41  
42  
43 378 that the rate of pedestrian crashes shortly after sunset was higher than that of any  
44  
45  
46 379 other time in Japan, our study revealed that compared with sunrise times, the adverse  
47  
48  
49 380 effect of sun glare on pedestrian fatalities was greater during sunset hours in Taiwan.  
50  
51  
52 381 It is therefore evident here that sun glare during the sunset hours may not only  
53  
54  
55 382 increase pedestrian crashes, as indicated by Hagita and Mori<sup>22</sup>, but also the resulting  
56  
57  
58 383 injury severity.  
59  
60



1  
2  
3  
4 384 Studies have suggested that intoxicated motorists were more likely to leave  
5  
6  
7 385 pedestrians unattended by leaving the crash scene, thereby increasing pedestrian  
8  
9  
10 386 injury severity; and furthermore, alcohol use has been discovered to be a more  
11  
12  
13 387 prevalent factor for hit-and-runs at nights and during the weekend.<sup>23 24</sup> Our study  
14  
15  
16 388 revealed that the combined effects of alcohol consumption and sun glare were  
17  
18  
19 389 associated with pedestrian fatalities. Similar to other studies<sup>23 24</sup>, our research  
20  
21  
22 390 highlights, in particular, the effect of motorist alcohol consumption on fatal injuries  
23  
24  
25 391 and on the weekends.

26  
27  
28 392 Other studies have consistently reported that elderly motorists were the group most  
29  
30  
31 393 affected by sun glare. For example, two simulation studies conducted by Gray and  
32  
33  
34 394 Regan<sup>6</sup> and Theeuwes et al.<sup>7</sup> reported that in conditions of sun glare, older drivers  
35  
36  
37 395 executing a turning manoeuvre demonstrated a significantly greater reduction in  
38  
39  
40 396 safety margin than did younger drivers; and older drivers demonstrated the most  
41  
42  
43 397 significant decrease in the ability to successfully detect pedestrians. Studies analysing  
44  
45  
46 398 real-life police-reported crash data<sup>15</sup> have indicated that in conditions of sun glare,  
47  
48  
49 399 older drivers were more likely to strike other vehicles. Our study contributes to the  
50  
51  
52 400 literature on pedestrian safety literature by concluding that older motorists, when  
53  
54  
55 401 affected by sun glare, cause fatal injuries to pedestrians once a crash has occurred.  
56  
57  
58 402 Advance warning signs or educational efforts to increase older driver's awareness of  
59  
60

1  
2  
3  
4 403 sun-glare conditions may either temper the likelihood of vehicle crashes or reduce  
5  
6  
7 404 pedestrian injury severity.  
8  
9

10 405 Considerable work has consistently concluded that older pedestrians were more  
11  
12  
13 406 likely to be fatally or severely injured in crashes, both during daytime and night  
14  
15  
16 407 conditions.<sup>25</sup> Our research has provided ample evidence to suggest that injuries  
17  
18  
19 408 sustained by older pedestrians in crashes caused by sun glare are more fatal than those  
20  
21  
22 409 sustained by younger pedestrians. It is unclear whether the reduced conspicuity of  
23  
24  
25 410 pedestrians (particularly older pedestrians) under conditions of sun glare (twilight)  
26  
27  
28 411 plays a role in this effect. However, enhancing the conspicuity of pedestrians through  
29  
30  
31 412 the use of visibility aids, not only in night conditions<sup>26</sup> but also in twilight conditions,  
32  
33  
34 413 may be beneficial for reducing crash risk or severity.  
35  
36

37 414 Adding to the research conducted by Sun et al.<sup>14</sup>, who reported that crashes related  
38  
39  
40 415 to improper turning or lane changing were more likely to occur during periods of sun  
41  
42  
43 416 glare, this present study concludes that an association exists between the execution of  
44  
45  
46 417 overtaking manoeuvres during periods of sun glare and pedestrian fatalities. It is not  
47  
48  
49 418 uncommon for injuries sustained in crashes caused by vehicle overtaking to be severe  
50  
51  
52 419 because motorists must accelerate to overtake other vehicles. In Taiwan, it is common  
53  
54  
55 420 that motorists execute overtaking manoeuvres by using roadway shoulders where  
56  
57  
58 421 there are pedestrians. Motorists should be aware of the risk they pose to pedestrians  
59  
60

1  
2  
3  
4 422 when overtaking other vehicles, particularly during periods of sun glare.  
5  
6

7 423 Studies have reported that facing traffic is beneficial for preventing pedestrian  
8  
9  
10 424 crashes<sup>27</sup> and decreasing the severity of related injuries<sup>25</sup>. Our study complements  
11  
12  
13 425 these two studies by concluding that walking against the traffic was associated with  
14  
15  
16 426 decreased injury severity. Information expressing the necessity facing traffic while  
17  
18  
19 427 walking along a street, particularly in conditions of sun glare, should be supplemented  
20  
21  
22 428 with specific information regarding its safety benefits.  
23  
24

25 429 Although differing for observed pedestrians, being struck by heavy vehicles  
26  
27  
28 430 increased the likelihood of fatal injuries. Although this finding agrees with those of  
29  
30  
31 431 other studies<sup>28 29</sup> reporting the tendency of injuries sustained by pedestrians to be fatal  
32  
33  
34 432 or more severe when struck by a heavy vehicle, we concluded that the effect of heavy  
35  
36  
37 433 vehicles was greater in conditions of sun glare. Notably, drivers of heavy vehicles  
38  
39  
40 434 tend to be professional. It is unclear whether drivers of this particular group, in  
41  
42  
43 435 combination with undertaking longer hours of travel than those undertaken by a car  
44  
45  
46 436 driver, are more susceptible to problems related to sun glare. Educational efforts can  
47  
48  
49 437 be directed towards drivers of heavy vehicles regarding their susceptibility to sun  
50  
51  
52 438 glare, and on roadways with pedestrians in particular.  
53  
54

55 439 This study had the following research limitations. First, our study did not consider  
56  
57  
58 440 surrounding topography; it is possible that motorists travelling through some areas  
59  
60

1  
2  
3  
4 441 with buildings or mountains, for example, are less susceptible to sun glare because the  
5  
6  
7 442 sun is occluded. By analysing geographic data and data from police reports, likely  
8  
9  
10 443 locations for sun glare can be predicted, and motorists can be well informed regarding  
11  
12  
13 444 where to expect sun glare. Furthermore, we classified a crash as being glare-related  
14  
15  
16 445 when the angular distance between the driver's line of sight and the sun was between  
17  
18  
19 446 0° and 45°. Further investigations should be conducted concerning the angular  
20  
21  
22 447 distances at which sun glare affects motorists, as well as the variance of this effect for  
23  
24  
25 448 motorists of different ages, as indicated by Jurado-Piña and Pardillo Mayora<sup>9</sup>. Indeed,  
26  
27  
28 449 sun glare is a combined spatial-temporal factor. To broaden our collective  
29  
30  
31 450 understanding of factors in pedestrian safety, it is paramount that additional spatial  
32  
33  
34 451 data and temporal data be collected and compared whenever possible. Finally, the  
35  
36  
37 452 empirical results obtained in this study may be unique to Taiwan because of its unique  
38  
39  
40 453 sunrise and sunset times and orientations. As a result, until additional analyses are  
41  
42  
43 454 conducted using data from other jurisdictions to determine whether sun glare is a  
44  
45  
46 455 salient factor to pedestrian fatalities, caution should be exercised in generalising our  
47  
48  
49 456 findings for application in other settings.

50  
51 457

#### 52 53 458 **Acknowledgements**

54  
55  
56 459 Pai CW contributes to the design of the work, data analysis, interpretation of the data,  
57  
58  
59 460 drafting the manuscript and final approval of the version to be published.  
60

1  
2  
3  
4 461 The authors declare to have no conflict of interests.  
5

6  
7 462 The research was funded by research grants from Ministry of Science and  
8  
9  
10 463 Technology, Taiwan (105-222-E-038 -013-MY3).  
11

12  
13 464 The data sources used in the present study were the National Traffic Accident Dataset  
14  
15  
16 465 and the NOAA.  
17

18 466

19  
20 467 **Reference**  
21

22 468

- 23 469 1. Owsley C, Mcgwin G Jr. Vision and driving. *Vision Research* 2010; 50(23):  
24 470 2348-2361.  
25  
26 471 2. Tversky A, Kahneman D. Judgment under uncertainty heuristics and biases.  
27 472 *Science* 1974; 185(4157): 1124-1131.  
28  
29 473 3. Mitra S. Sun glare and road safety: an empirical investigation of intersection  
30 474 crashes. *Safety Science* 2014; 70: 246-254.  
31  
32 475 4. Donald AR, Robert JT. Why cars in the next lane seem to go faster. *Nature* 1999;  
33 476 401: 35-36.  
34  
35 477 5. Redelmeier DA, Raza S. Optical illusions and life-threatening traffic crashes: a  
36 478 perspective on aerial perspective. *Medical Hypotheses* 2018; 114: 23-27.  
37  
38 479 6. Gray R, Regan D. Glare susceptibility test results correlate with temporal safety  
39 480 margin when executing turns across approaching vehicles in simulated low-sun  
40  
41 481 conditions. *Ophthalmic and Physiological Optics* 2007; 27(5): 440-450.  
42  
43 482 7. Theeuwes J, Alferdinck JW, Perel M. Relation between glare and driving  
44 483 performance. *Human Factors* 2002; 44(1): 95-107.  
45  
46 484 8. Churchill AM, Tripodis Y, Lovell DJ. Sun glare impacts on freeway congestion:  
47 485 geometric model and empirical analysis. *Journal of Transportation Engineering*  
48 486 2012; 138: 1196-1204.  
49  
50 487 9. Jurado-Piña R, Pardillo Mayora JM. Methodology to predict driver vision  
51 488 impairment situations caused by sun glare. *Transportation Research Record:*  
52 489 *Journal of the Transportation Research Board* 2009; 2120:, 12-17.  
53  
54 490 10. Anue K. *Sun glare detection and visualization*. 2017. Master's degree in  
55 491 Computer Science. Department of Computer Science. Norwegian University of  
56 492 Science and Technology, 2017.  
57  
58 493 11. Redelmeier DA, Raza S. Life-threatening motor vehicle crashes in bright  
59  
60

- 1  
2  
3 494 sunlight. *Medicine* 2017; 96(1): e5710.
- 4  
5 495 12. Mitra S, Washington S. *On the significance of omitted variables in intersection*  
6 496 *crash modeling*. *Accident Analysis and Prevention* 2012; 49: 439-448.
- 7  
8 497 13. Hagita K, Mori K. The effect of sun glare on traffic accidents in Chiba  
9 498 prefecture, Japan. *Asian Transport Studies* 2014; 3(2): 205-219.
- 10  
11 499 14. Sun D, El-Basyouny K, Kwon TJ. Sun glare: Network characterization and  
12 500 safety effects. *Transportation Research Record: Journal of the Transportation*  
13 501 *Research Board* 2018.
- 14  
15 502 15. Choi EH, Santokh S. *Statistical assessment of the glare issue – human and*  
16 503 *natural elements*. Proceeding of 2005 FCSM Conference, Federal Committee on  
17 504 Statistical Methodology, Arlington, VA, 2005; 1-8.
- 18  
19 505 16. National Oceanic Earth System Research Laboratory and Atmospheric  
20 506 Administration. <https://www.esrl.noaa.gov/gmd/grad/solcalc/> Accessed:  
21 507 2018-08-22.
- 22  
23 508 17. Mchugh ML. The chi-square test of independence. *Biochemia Medica* 2013;  
24 509 23(2): 143-149.
- 25  
26 510 18. Barbieri S, Vettore G, Pietrantonio V, Snenghi R, Tredese A, Bergamini M,  
27 511 Previato S, Stefanati A, Gaudio RM, Feltracco P. Pedestrian inattention  
28 512 blindness while playing Pokemon Go as an emerging health-risk behavior: a case  
29 513 report. *Journal of Medical Internet Research* 2017; 19(4): e86.
- 30  
31 514 19. Chen PL, Pai CW. Evaluating the effects of smartphone racing games and other  
32 515 game types on pedestrian's risk-taking inclinations. *Computers in Human*  
33 516 *Behavior* 2018; 88: 78-83.
- 34  
35 517 20. Bhat CR. Quasi-random maximum simulated likelihood estimation of the mixed  
36 518 multinomial logit model. *Transportation Research Part B: Methodological* 2001;  
37 519 35(7): 677-693.
- 38  
39 520 21. Manski CF, Mcfadden DL. *A structural analysis of discrete data with*  
40 521 *econometric applications*. The MIT Press, Cambridge, MA. 1981.
- 41  
42 522 22. Hagita K, Mori K. Traffic accident analysis of sun glare and twilight shortly  
43 523 before and after sunset in Chiba prefecture, Japan. *Journal of the Eastern Asia*  
44 524 *Society for Transportation Studies* 2015; 11: 1999-2014.
- 45  
46 525 23. Solnick SJ, Hemenway D. Hit the bottle and run: The role of alcohol in  
47 526 hit-and-run pedestrian fatalities. *Journal of Studies on Alcohol and Drugs* 1994;  
48 527 55(6): 679-684.
- 49  
50 528 24. Solnick SJ, Hemenway D. The hit-and-run in fatal pedestrian accidents: victims,  
51 529 circumstances and drivers. *Accident Analysis and Prevention* 1995; 27(5):  
52 530 643-649.
- 53  
54 531 25. Chen PL, Jou RC, Saleh W, Pai CW. Accidents involving pedestrians with their  
55  
56  
57  
58  
59  
60

- 1  
2  
3  
4 532 backs to traffic or facing traffic: an evaluation of crash characteristics and  
5 533 injuries. *Journal of Advanced Transportation* 2016; 50(5): 736-751.
- 6 534 26. Kwan I, Mapstone J. Interventions for increasing pedestrian and cyclist visibility  
7 535 for the prevention of death and injuries. *Cochrane Database of Systematic*  
8 536 *Reviews* 2006; (4): CD003438.
- 9  
10  
11 537 27. Luoma J, Peltola H. Does facing traffic improve pedestrian safety? *Accident*  
12 538 *Analysis and Prevention* 2013; 50: 1207-1210.
- 13  
14 539 28. Lefler DE, Gabler HC. The fatality and injury risk of light truck impacts with  
15 540 pedestrians in the united states. *Accident Analysis and Prevention* 2004; 36(2):  
16 541 295-304.
- 17  
18 542 29. Dong B, Ma X, Chen F. Analyzing the injury severity sustained by non-motorists  
19 543 at mid-blocks considering non-motorists' pre-crash behavior. *Transportation*  
20 544 *Research Record: Journal of the Transportation Research Board* 2018; 1-11.
- 21  
22  
23 545  
24 546  
25 547  
26 548  
27 549  
28 550  
29 551  
30  
31  
32  
33  
34  
35  
36  
37  
38  
39  
40  
41  
42  
43  
44  
45  
46  
47  
48  
49  
50  
51  
52  
53  
54  
55  
56  
57  
58  
59  
60

Appendix 1: Directions of sunrise and sunset in Taiwan

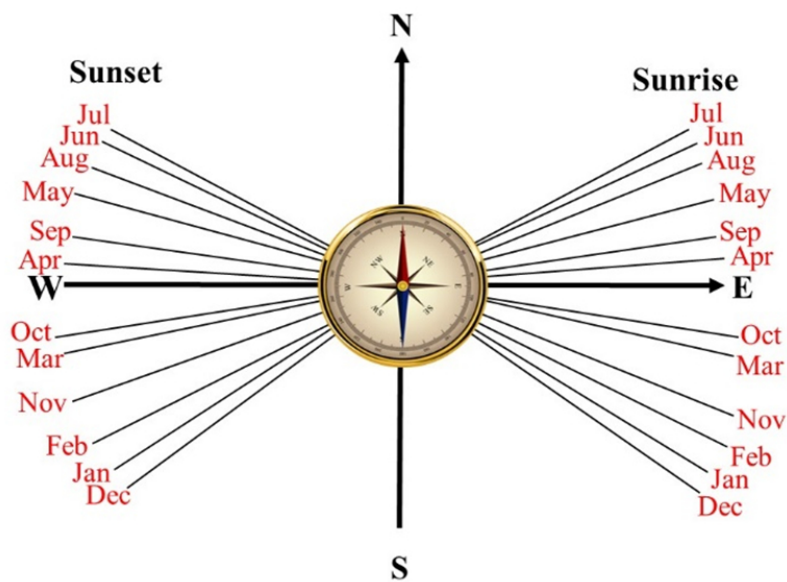

254x190mm (96 x 96 DPI)



1  
2  
3  
4  
5  
6  
7  
8  
9  
10  
11  
12  
13  
14  
15  
16  
17  
18  
19  
20  
21  
22  
23  
24  
25  
26  
27  
28  
29  
30  
31  
32  
33  
34  
35  
36  
37  
38  
39  
40  
41  
42  
43  
44  
45  
46  
47  
48  
49  
50  
51  
52  
53  
54  
55  
56  
57  
58  
59  
60

Figure 2: Flow-chart of sample selection

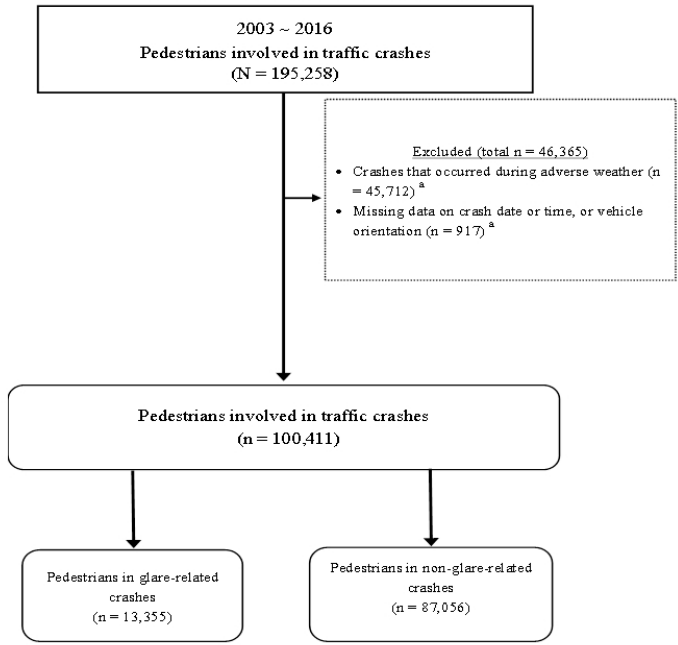

<sup>a</sup> Because these cases were not mutually exclusive, the total number of cases excluded was 46,365.

254x190mm (96 x 96 DPI)

# BMJ Open

## A population-based case-control study of the effect of sun glare on pedestrian fatalities in Taiwan

|                                 |                                                                                                                                                                                                                                                                                                                                                                                                                                                                                                                                                                                                                                                                                                        |
|---------------------------------|--------------------------------------------------------------------------------------------------------------------------------------------------------------------------------------------------------------------------------------------------------------------------------------------------------------------------------------------------------------------------------------------------------------------------------------------------------------------------------------------------------------------------------------------------------------------------------------------------------------------------------------------------------------------------------------------------------|
| Journal:                        | <i>BMJ Open</i>                                                                                                                                                                                                                                                                                                                                                                                                                                                                                                                                                                                                                                                                                        |
| Manuscript ID                   | bmjopen-2018-028350.R1                                                                                                                                                                                                                                                                                                                                                                                                                                                                                                                                                                                                                                                                                 |
| Article Type:                   | Research                                                                                                                                                                                                                                                                                                                                                                                                                                                                                                                                                                                                                                                                                               |
| Date Submitted by the Author:   | 05-Mar-2019                                                                                                                                                                                                                                                                                                                                                                                                                                                                                                                                                                                                                                                                                            |
| Complete List of Authors:       | Ma, Hon-Ping; Shuang Ho Hospital - Taipei Medical University, Emergency medicine<br>Chen, Ping-Ling; Graduate Institute of Injury Prevention and Control<br>Chen, Shang-Ku; Shuang Ho Hospital - Taipei Medical University, Emergency Medicine; Taipei Medical University, Graduate Institute of Injury Prevention and Control<br>Chen, Liang-Hao; Taipei Medical University, Graduate Institute of Injury Prevention and Control; Wan-Fang Hospital, Taipei Medical University, Department of Emergency Medicine<br>Linkov, Vaclav; Department of Traffic Psychology, CDV, Transport Research Centre<br>Pai, Chih-Wei; Taipei Medical University, Graduate Institute of Injury Prevention and Control |
| <b>Primary Subject Heading</b>: | Epidemiology                                                                                                                                                                                                                                                                                                                                                                                                                                                                                                                                                                                                                                                                                           |
| Secondary Subject Heading:      | Epidemiology                                                                                                                                                                                                                                                                                                                                                                                                                                                                                                                                                                                                                                                                                           |
| Keywords:                       | ACCIDENT & EMERGENCY MEDICINE, PUBLIC HEALTH, EPIDEMIOLOGY                                                                                                                                                                                                                                                                                                                                                                                                                                                                                                                                                                                                                                             |
|                                 |                                                                                                                                                                                                                                                                                                                                                                                                                                                                                                                                                                                                                                                                                                        |

SCHOLARONE™  
Manuscripts

1  
2  
3  
4 **1 A population-based case-control study of the effect of sun glare on pedestrian**  
5  
6  
7 **2 fatalities in Taiwan**  
8  
9

10 3 Hon-Ping Ma <sup>a, b, c</sup>, Ping-Ling Chen <sup>a</sup>, Shang-Ku Chen <sup>a, b</sup>, Liang-Hao Chen <sup>a, d</sup>, Václav  
11  
12  
13 4 Linkov <sup>e</sup>, Chih-Wei Pai <sup>a, \*</sup>  
14  
15

16 5 <sup>a</sup> Graduate Institute of Injury Prevention and Control, College of Public Health, Taipei  
17  
18  
19 6 Medical University, Taiwan  
20  
21

22 7 <sup>b</sup> Department of Emergency Medicine, Shuang-Ho Hospital, Taipei Medical  
23  
24  
25 8 University, Taiwan  
26  
27

28 9 <sup>c</sup> Department of Emergency Medicine, School of Medicine, Taipei Medical  
29  
30  
31 10 University, Taiwan  
32  
33

34 11 <sup>d</sup> Department of Emergency Medicine, Wan-Fang Hospital, Taipei Medical  
35  
36  
37 12 University, Taiwan  
38  
39

40 13 <sup>e</sup> Department of Traffic Psychology, CDV-Transport Research Centre, Brno, Czech  
41  
42  
43 14 Republic  
44  
45

46 15 \* Corresponding author  
47  
48

49 16 Email: [cpai@tmu.edu.tw](mailto:cpai@tmu.edu.tw)  
50  
51

52 17 +886 02-27361661 ext.6575  
53  
54

55 18 Address: Graduate Institute of Injury Prevention and Control, College of Public  
56  
57  
58 19 Health, Taipei Medical University, 250 Wuxing St, Taipei City, Taiwan 110.  
59  
60

1  
2  
3  
4 20 **Word count: 4907**  
5  
6

7 21  
8  
9

10 22 **Abstract**  
11  
12

13 23 **Objectives** Sun glare poses serious driving hazards and increases accident risks.  
14  
15

16 24 Relatively few studies, however, have been conducted to examine the effects of sun  
17  
18  
19 25 glare on pedestrian fatalities, given that an accident has occurred. The primary  
20  
21  
22 26 objective of this study was to investigate the effect of sun glare on pedestrian  
23  
24  
25 27 fatalities.  
26  
27

28 28 **Design** A population-based case-control study.  
29  
30

31 29 **Setting** Taiwan.  
32  
33

34 30 **Participants** Using the Taiwan National Traffic Crash Data and sunrise and sunset  
35  
36  
37 31 data from the National Oceanic and Atmospheric Association (NOAA) for the period  
38  
39  
40 32 2003–2016, 100,411 pedestrians involved in crashes were identified. Of these crashes,  
41  
42  
43 33 there were 13,355 and 87,056 cases of glare-related (case) and nonglare-related  
44  
45  
46 34 (control) crashes, respectively.  
47  
48

49 35 **Methods** To account for unobserved heterogeneity, mixed logit models were  
50  
51  
52 36 estimated to identify the determinants of pedestrian fatalities.  
53  
54

55 37 **Main outcome measures** Pedestrian fatalities.  
56  
57

58 38 **Results** Pedestrians involved in glare crashes were more likely to be fatally injured  
59  
60

1  
2  
3  
4 39 than those in nonglare crashes. Other contributory factors to fatal injuries among  
5  
6  
7 40 pedestrians were older pedestrians, male drivers, older drivers, intoxicated motorists,  
8  
9  
10 41 rural roadways, car overtaking manoeuvres, a heavy vehicle as the crash partner, and  
11  
12  
13 42 sunset hours. Walking against traffic appeared to be beneficial in decreasing injury  
14  
15  
16 43 severity.

17  
18  
19 44 **Conclusions** Sun glare was associated with pedestrian fatalities. Older pedestrians,  
20  
21  
22 45 male drivers, older drivers, and intoxicated motorists were prevalent determinants of  
23  
24  
25 46 pedestrian fatalities in glare-related crashes.

26  
27  
28 47 **Keywords:** Sun glare; Pedestrian fatalities; Crashes; Injury  
29  
30  
31 48

32  
33  
34 49 **Strengths and limitations of this study**

- 35  
36  
37 50 ● This is the first nationwide population-based case-control study to  
38  
39  
40 51 investigate the associations between pedestrian fatalities and sun glare.  
41  
42  
43 52 ● The large population-based dataset minimises selection bias.  
44  
45  
46 53 ● Glare-related crashes were defined by adjusting vehicle travel direction and  
47  
48  
49 54 daily times and orientations of sunrise and sunset.  
50  
51  
52 55 ● Limitations of this study include the data that are unavailable from the two  
53  
54  
55 56 datasets such as geographic characteristics.  
56  
57  
58 57  
59  
60

## 58 Introduction

59

60 Driving is a highly visual task that involves visual function and processing for  
61 establishing the effective control over a vehicle.<sup>1</sup> Research<sup>2,3</sup> has suggested that bright  
62 sunlight was ideal for driving because it increases the contrast, resolution, and  
63 luminosity of the surrounding landscapes. As a result, drivers may misinterpret the  
64 speed at which the surrounding landscape is approaching and gauge their travel  
65 velocity to be illusively slow, which would in turn prompt drivers to compensate by  
66 accelerating.<sup>4,5</sup>

67 Generally, bright sunlight causes temporary blindness when the sun is at a  
68 relatively low altitude and its rays fall directly in an individual's line of sight (e.g.,  
69 just after sunrise or before sunset when the sun is above the horizon). By using a  
70 simulator, Gray and Regan<sup>6</sup> assessed the driving performance in both the absence and  
71 presence of a simulated low sun. They reported that sun glare resulted in a significant  
72 reduction in the safety margin accepted by drivers; the mean number of crashes was  
73 significantly higher during conditions of glare than during those of without glare, and  
74 older drivers exhibited a significantly greater reduction in the safety margin than did  
75 younger drivers. Another simulation study was conducted by Theeuwes et al.<sup>7</sup>, who  
76 reported that low glare sources resulted in participants (drivers) exhibiting a

1  
2  
3  
4 77 significant drop in the ability to detect simulated pedestrians along the roadside.  
5  
6  
7 78 Theeuwes et al.<sup>7</sup> also pointed out that older participants reduced their driving speed  
8  
9  
10 79 the most and exhibited the largest drop in successful pedestrian detection.  
11

12  
13 80 Churchill et al.<sup>8</sup> employed a geometric model for examining whether sun glare  
14  
15  
16 81 affects the speeds of drivers on roadways and concluded that changes in speed as a  
17  
18  
19 82 result of sun glare was a factor in highway congestion. Jurado-Piña and Pardillo  
20  
21  
22 83 Mayora<sup>9</sup>, in an attempt to investigate the maximum tolerable sun glare caused by the  
23  
24  
25 84 angle between the sun and driving direction, pointed out that glare occurs when there  
26  
27  
28 85 is a specific angular distance between the driver's line of sight and the sun; this  
29  
30  
31 86 angular distance is 19° for a 40-year-old driver and 25° for a 60-year-old driver.  
32  
33  
34 87 Anue<sup>10</sup> suggested that in general no sun glare occurs if the angular distance is greater  
35  
36  
37 88 than 25°.  
38

39  
40 89 Several studies have investigated whether a direct relationship exists between sun  
41  
42  
43 90 glare and crashes by using data from police report or hospital. In a longitudinal study  
44  
45  
46 91 of patients who had been hospitalised as a consequence of a motor-vehicle crash,  
47  
48  
49 92 Redelmeier and Raza<sup>11</sup> concluded that bright sunlight was associated with an  
50  
51  
52 93 increased risk of life-threatening motor-vehicle crashes in Canada. By analysing  
53  
54  
55 94 police-reported crash data from Arizona, Mitra and Washington<sup>12</sup> indicated that sun  
56  
57  
58 95 glare was a crucial omitted variable that could explain intersection crash occurrence  
59  
60

1  
2  
3  
4 96 and that including this variable improved the explanatory power of statistical models.  
5  
6  
7 97 By linking police-reported crash data from Arizona with sunrise and sunset data from  
8  
9  
10 98 NOAA, Mitra<sup>3</sup> concluded that the odds of glare causing a crash were higher at  
11  
12  
13 99 intersections with roadways running eastbound and westbound than at those running  
14  
15  
16 100 northbound and southbound. Mitra<sup>3</sup> further indicated that rear-end and angle crashes  
17  
18  
19 101 at signalised intersections were affected by sun glare, and, furthermore, the severity of  
20  
21  
22 102 motorist injury was unaffected by sun glare. A study that analysed traffic-accident  
23  
24  
25 103 database of Chiba, Japan, Hagita and Mori<sup>13</sup> revealed a higher occurrence of crashes  
26  
27  
28 104 involving pedestrians or bicycles at intersections where the sun was below 45° above  
29  
30  
31 105 the horizon in the driving direction. Sun et al.<sup>14</sup>, who analysed police-reported crash  
32  
33  
34 106 data in Edmonton, Canada, reported similar findings, concluding that sun glare  
35  
36  
37 107 significantly contributed to crash occurrence, especially at intersections. Furthermore,  
38  
39  
40 108 they also indicated that the effect of sun glare on crash occurrence during the  
41  
42  
43 109 mornings on eastbound roads and evenings on westbound roads was significantly  
44  
45  
46 110 greater during the spring and autumn months and that certain crash types (e.g., crashes  
47  
48  
49 111 related to signal violation, failure to yield to pedestrians/cyclists, improper turning,  
50  
51  
52 112 and lane changing) were more likely to occur during periods of sun glare. By  
53  
54  
55 113 analysing police-reported crash data, Choi and Singh<sup>15</sup> pointed out that elderly  
56  
57  
58 114 motorists tended to have a greater propensity for striking other vehicles in conditions  
59  
60



1  
2  
3  
4 115 of sun glare, especially on roadways that were not physically divided.  
5  
6

7 116 Based on our literature review above, a significant gap remains in the  
8  
9  
10 117 comprehensive understanding of the relationship between sun glare and pedestrian  
11  
12  
13 118 fatalities, conditioned on that a pedestrian crash has occurred. The primary research  
14  
15  
16 119 hypothesis of the present study is that pedestrian injury severity increases in  
17  
18  
19 120 accordance with restricted visibility (i.e., sun glare). As a result, the primary aim of  
20  
21  
22 121 this study was to investigate whether sun glare is associated with pedestrian fatalities.  
23  
24  
25 122 This study also aimed to investigate the determinants of pedestrian fatalities  
26  
27  
28 123 specifically in crashes related to sun glare.  
29  
30

31 124

## 32 33 34 125 **Materials and Methods**

### 35 36 37 126 *Data source*

38  
39  
40 127 By using the Taiwan National Traffic Crash Data as well as sunrise and sunset data  
41  
42  
43 128 from the National Oceanic and Atmospheric Association (NOAA) for the period from  
44  
45  
46 129 2003 to 2016 (National Oceanic Earth System Research Laboratory and Atmospheric  
47  
48  
49 130 Administration<sup>16</sup>. Accessed: 2018-08-22), the current study examined the effect of sun  
50  
51  
52 131 glare on pedestrian fatalities, given that an accident involving a vehicle and pedestrian  
53  
54  
55 132 has occurred. The Taiwan National Traffic Crash Data comprise two files: an accident  
56  
57  
58 133 file and a vehicle and victim file. Accident files contain general information on the  
59  
60

1  
2  
3  
4 134 times and dates of crashes; weather, road; and lighting conditions, and road type.  
5  
6  
7 135 Vehicle and victim files contain vehicle-related information, such vehicle type,  
8  
9  
10 136 manoeuvres, first point of impact, and orientation, as well as driver and casualty  
11  
12  
13 137 characteristics, such as age, sex, and injury severity. Injury severity is classified into  
14  
15  
16 138 two levels: fatality and injury. Victims who die within 24 h as a result of an accident  
17  
18  
19 139 are classified as cases of fatality, whereas victims who sustain injuries, whether mild  
20  
21  
22 140 or severe, are classified as cases of injury.  
23  
24

25 141 Data on daily sunrise and sunset times and orientation are available from the  
26  
27  
28 142 NOAA. The information on the sunrise and sunset orientation for Taiwan is presented  
29  
30  
31 143 in online supplementary appendix 1. By using the data on the temporal characteristics  
32  
33  
34 144 (i.e., time and date) and orientation of vehicle crashes from the Taiwan National  
35  
36  
37 145 Traffic Crash Data, pedestrian crashes were matched with the sunrise and sunset data  
38  
39  
40 146 of the NOAA and subsequently classified into glare-related or nonglare-related  
41  
42  
43 147 crashes. The Institutional Review Board that is affiliated with Taipei Medical  
44  
45  
46 148 University approved our study (IRB#: N201808071). Personal identification data such  
47  
48  
49 149 as name or identification number are not available in the dataset.  
50  
51

52 150 A glare-related crash is defined as a crash in which the following conditions are  
53  
54  
55 151 satisfied: the car was travelling in a direction towards the sunrise or sunset, and the  
56  
57  
58 152 angular distance between the driver's line of sight and the sun was between 0° and  
59  
60

1  
2  
3  
4 153 45°. Data on vehicle's travel path (north, south, east, or west) are available from the  
5  
6  
7 154 National Traffic Crash Dataset; and data on sun directions are available from the  
8  
9  
10 155 NOAA. The angular distances were adjusted according to the time of the crash  
11  
12  
13 156 (available from the National Traffic Crash Dataset) and daily sunrise and sunset times  
14  
15  
16 157 daily (available from the NOAA). For example, according to the Taiwan National  
17  
18  
19 158 Traffic Crash Data, a car-pedestrian crash took place in Hsinchu City, where a car  
20  
21  
22 159 heading to northeast collided with a pedestrian at 06:18 (A.M.) on 18 June, 2016. The  
23  
24  
25 160 angular distances, ranging from 0° to 45°, were reported<sup>13</sup> in Japan to cause sun glare  
26  
27  
28 161 and potentially affect traffic safety. We adopted the angular distance, range of 0–45°,  
29  
30  
31 162 as the threshold for defining a glare-related crash. According to the NOAA website,  
32  
33  
34 163 for this particular timing (18 June, 2016) and location (Hsinchu City with latitude of  
35  
36  
37 164 24.778 and longitude of 120.988), the sun rose from northeast, and the apparent  
38  
39  
40 165 sunrise and sunset times were at 05:07 and 18:47, respectively. The daytime length  
41  
42  
43 166 for this particular day is 13 hours and 40 mins, which is equivalent to 820 mins. The  
44  
45  
46 167 angular distances for sunrise and sunset are 0–180°; for this particular day, the sun  
47  
48  
49 168 moved 0.2195° every min ( $180/820=0.2195$ ). The adopted angular distance of 45° is  
50  
51  
52 169 equivalent to 205 mins ( $45/0.2195=205$ ); as such, the transformed angular distance of  
53  
54  
55 170 0–45° for this particular crash is between 05:07 to 08:32 that has a difference of 205  
56  
57  
58 171 mins. This particular crash was therefore classified as a glared-related crash because  
59  
60

1  
2  
3  
4 172 the car headed to northeast (which was the direction of the sunrise) and the time of the  
5  
6  
7 173 crash (06:18) falls into the angular distance of 0–45° (i.e., between 05:07 and 08:32).  
8  
9

10 174 A flow-chart of the sample selection from the Taiwan Traffic Crash Dataset for  
11  
12  
13 175 the period from 2003 to 2016 is presented in online supplementary Appendix 2. A  
14  
15  
16 176 total of 195,258 pedestrian casualties from traffic crashes were extracted from during  
17  
18  
19 177 this period. This study considered only pedestrian crashes where the crash partner was  
20  
21  
22 178 a motorcycle, car, taxi, heavy-goods vehicle, bus, or coach. Crashes that occurred  
23  
24  
25 179 during adverse weather conditions, such as rain or fog, or when it was cloudy, were  
26  
27  
28 180 excluded (n = 45,712). A total of 917 cases had missing data with regard to accident  
29  
30  
31 181 date and time and vehicle orientation. Because these cases (adverse weather  
32  
33  
34 182 conditions and missing data) were not mutually exclusive, the total number of cases  
35  
36  
37 183 excluded was 45,365, yielding a total of 149,839 valid cases for pedestrian casualties.  
38  
39  
40 184 These valid cases were matched with the NOAA sunrise and sunset data. After  
41  
42  
43 185 excluding crashes that had occurred after sunset and before sunrise (n = 49,428),  
44  
45  
46 186 100,411 cases of pedestrian casualties remained. Of the 100,411 pedestrians that  
47  
48  
49 187 were matched with the sunrise and sunset data from the NOAA, 13,355 were  
50  
51  
52 188 glare-related cases (treated as cases), and 87,056 were nonglare-related cases (treated  
53  
54  
55 189 as controls), respectively.  
56  
57

58 190  
59  
60

1  
2  
3  
4 191 *Definition of variables*  
5  
6

7 192 The following demographic data were collected for casualties: sex, age (four  
8  
9  
10 193 groups: <18, 18–40, 41–64, and  $\geq 65$  years), alcohol use (yes: breathalyser test results  
11  
12  
13 194  $\geq 0.15$  mg/L or blood-alcohol concentration [BAC] level  $> 0.03\%$ ; no: breathalyser  
14  
15  
16 195 test results  $< 0.15$  mg/L or BAC level  $\leq 0.03\%$ ), licence status (licensed: with a valid  
17  
18  
19 196 licence; or unlicensed: without a valid licence), and pedestrian crossing manner  
20  
21  
22 197 (facing traffic: pedestrians walking towards traffic; back to traffic: pedestrians  
23  
24  
25 198 walking back to the traffic; crossing: pedestrians crossing the street). In Taiwan, those  
26  
27  
28 199 under the age 18 are identified as teenagers who are unable to legally ride motorcycles  
29  
30  
31 200 or drive car. Those aged 65 years or older were identified as the elderly individual.  
32  
33  
34 201 For individuals aged 18–40 and 41–64, we classified the remaining ages into two even  
35  
36  
37 202 age intervals. BAC data were obtained by police who conducted breathalyser tests or  
38  
39  
40 203 followed up for blood tests at hospitals. According to Taiwanese law, drivers with  
41  
42  
43 204 either breathalyser test  $\geq 0.15$  mg/L or BAC level  $> 0.03\%$  were considered to be  
44  
45  
46 205 drunk-driving. Data from breathalyser tests or BAC levels were available only for  
47  
48  
49 206 motorists not for pedestrians because, by law, only motorists involved in crashes are  
50  
51  
52 207 mandated to be tested for alcohol consumption.  
53  
54

55 208 The vehicle attribute considered was the crash partner (motorcycle, car, taxi, and  
56  
57  
58 209 heavy vehicles such as buses and coaches). The following road factors were  
59  
60

1  
2  
3  
4 210 considered: sun glare (yes: affected by sun glare; no: unaffected by sun glare) and  
5  
6  
7 211 crash location (rural: roadways with speed limits of  $\geq 51$ km/h, and urban: roadways  
8  
9  
10 212 with speed limits of  $\leq 50$ km/h). Two temporal factors, month of the crash  
11  
12  
13 213 (spring/summer: March–August or autumn/winter: September–February) and days of  
14  
15  
16 214 crash (weekday: Monday–Friday or weekend: Saturday–Sunday) were examined.  
17  
18

19 215

### 22 216 *Patient and Public Involvement*

23  
24  
25 217 The current research analysed national police-reported crash data as well as sunrise  
26  
27  
28 218 and sunset data from the National Oceanic and Atmospheric Association, which are  
29  
30  
31 219 anonymised datasets. Patients and or public were not involved in this study.  
32  
33

34 220

### 37 221 *Statistical analysis*

38  
39  
40 222 The distribution of pedestrian injury severity according to a set of variables (e.g.,  
41  
42  
43 223 human attributes, environmental factors, and vehicle characteristics) is reported in this  
44  
45  
46 224 study. Chi-square tests were conducted to examine the association between the  
47  
48  
49 225 independent variables and pedestrian injury severity. Because the dependent variable  
50  
51  
52 226 was binary (fatal vs. injury), the binary mixed logit models, which allow parameter  
53  
54  
55 227 coefficients to have distribution rather than fixed across the individuals, were  
56  
57  
58 228 estimated. Using the chi-square tests, the variables discovered to be significantly  
59  
60

1  
2  
3  
4 229 associated with the outcome ( $p < 0.2$ ) were then incorporated into the multivariate  
5  
6  
7 230 mixed logit models. To detect the multi-collinearity among the variables (all  
8  
9  
10 231 categorical), a chi-square independent test was conducted and Cramer's  $V^{17}$  was  
11  
12  
13 232 estimated. To determine whether sun glare was associated with pedestrian fatalities,  
14  
15  
16 233 one overall model that includes sun glare as one of the variables was utilised. One  
17  
18  
19 234 additional model with interaction terms of sun-glare-related crashes with other  
20  
21  
22 235 variables was subsequently estimated.

23 236 Mixed logit models were estimated to account for unobserved heterogeneity that  
24  
25  
26 237 may have arisen as a consequence of unmeasured variables, such as risk perception,  
27  
28  
29 238 behavioural factors, and other socioeconomic factors not available in the crash data  
30  
31  
32 239 from police reports. One example of a behavioural factor is distraction by phone use  
33  
34  
35 240 that may result in risk-taking inclinations and consequently an increased risk of  
36  
37  
38 241 injury.<sup>18 19</sup> Ignoring the effects of unobserved variables may lead to inconsistent  
39  
40  
41 242 estimates to all statistical models.<sup>20</sup>

42  
43  
44 243 In the present study, the utility of the injury severity  $i$  for a crash  $n$  is defined as  
45  
46  
47 244 follows:

48  
49  
50  
51 245  $IS_{in} = \beta_n^i X_{in} + \varepsilon_{in}$  Eq. (1)  
52  
53  
54 246

55  
56  
57 247 where  $IS_{in}$  is an injury-severity function determining the injury-severity category  $i$   
58  
59  
60

1  
2  
3  
4 248 (fatal or injury) for an individual pedestrian  $n$ ,  $X_{in}$  is a vector of the observed  
5  
6  
7 249 variables, such as pedestrian and driver attributes, vehicle characteristics, and  
8  
9  
10 250 environmental or temporal variables,  $\beta_n$  is a vector of the parameters associated with  
11  
12  
13 251  $X_{in}$ , and  $\varepsilon_{in}$  is the error term. The mixed logit model uses  $\beta_n$  as a vector of estimable  
14  
15  
16 252 parameters, which varies across the observed pedestrians. The variation is observed  
17  
18  
19 253 with density  $f(\beta|\theta)$ , where  $\theta$  is a vector of the parameters of the density distribution. In  
20  
21  
22 254 most applications, mixed models specify that the density  $f$  has a continuous  
23  
24  
25 255 distribution, such as a normal, lognormal, triangular, or uniform distribution.

26  
27  
28 256 Given error terms that are independent and identically Gumbel distributed<sup>21</sup>, the  
29  
30  
31 257 unconditional probability of one alternative  $i$  (from the set of injury-severity  
32  
33  
34 258 categories  $I$ ) is the integral of the conditional probability with a multinomial logit  
35  
36  
37 259 form over the parameter  $\beta$  of density  $f$ :

38  
39  
40  
41 260 
$$P_{in} = \int \left( \frac{\exp(\beta' X_{in})}{\sum_{j=1}^I 1 + \exp(\beta' X_{nj})} \right) f(\beta|\theta) d\beta \quad \text{Eq. (2)}$$
  
42  
43  
44  
45

46 261

47  
48  
49 262 All parameters are first assumed to be random and then their estimated standard  
50  
51  
52 263 deviations are evaluated using a zero-based (asymptotic)  $t$ -test for each parameter.  
53  
54  
55 264 One study<sup>20</sup> pointed out that a simulation-based maximum likelihood with 200 Halton  
56  
57  
58 265 draws may provide a more efficient distribution of draws for numerical integration  
59  
60



266 and requires fewer draws to achieve convergence. Attempts were made in the present  
 267 study to obtain more significant results by increasing the number of Halton draws, and  
 268 the results appeared stable with the use of 1000 Halton draws.

269

## 270 Results

271

272 Table 1 lists the distribution of pedestrian injury severity according to a set of  
 273 variables. Of the 13,355 glare-related cases, 329 pedestrians (2.46%) sustained fatal  
 274 injuries, which is higher than those in nonglare-related crashes (1.83%). Additionally,  
 275 the majority of pedestrian crashes involved motorists with valid licences (85.65%),  
 276 sober motorists (85.97%), urban roadways (89.57%), pedestrians who were hit while  
 277 crossing the street (65.85%), and nonglare conditions (86.70%) and occurred on  
 278 weekdays (74.83%).

279

280 Table 1: Distribution of pedestrian injury severity according to a set of variables for  
 281 the period 2003–2016.

|                   | N            | Fatal<br>n(%) | Injury<br>n(%) | $\chi^2$ test<br>p-value |
|-------------------|--------------|---------------|----------------|--------------------------|
| Total             | 100411       | 1925(1.92)    | 98486(98.08)   |                          |
| Sun glare         |              |               |                |                          |
| Yes               | 13355(13.30) | 329(2.46)     | 13026(97.54)   | <0.01                    |
| No                | 87056(86.70) | 1596(1.83)    | 85460(98.17)   |                          |
| Pedestrian gender |              |               |                |                          |
| Male              | 50942(50.73) | 1015(1.99)    | 49927(98.01)   | 0.08                     |
| Female            | 49469(49.27) | 910(1.84)     | 48559(98.16)   |                          |

|                               | N            | Fatal<br>n(%) | Injury<br>n(%) | $\chi^2$ test<br>p-value |
|-------------------------------|--------------|---------------|----------------|--------------------------|
| <b>Driver gender</b>          |              |               |                |                          |
| Male                          | 53351(53.13) | 1132(2.12)    | 52219(97.88)   | <0.01                    |
| Female                        | 47060(46.87) | 793(1.69)     | 46267(98.31)   |                          |
| <b>Pedestrian age</b>         |              |               |                |                          |
| <18                           | 3644(3.63)   | 67(1.84)      | 3577(98.16)    | <0.01                    |
| 18-40                         | 25851(25.75) | 154(0.60)     | 25697(99.40)   |                          |
| 41-64                         | 31283(31.15) | 352(1.13)     | 30931(98.87)   |                          |
| $\geq 65$                     | 39633(39.47) | 1352(3.41)    | 38281(96.59)   |                          |
| <b>Driver age</b>             |              |               |                |                          |
| <18                           | 4458(4.44)   | 103(2.31)     | 4355(97.69)    | <0.01                    |
| 18-40                         | 25808(25.70) | 295(1.14)     | 25513(98.86)   |                          |
| 41-64                         | 32523(32.39) | 474(1.46)     | 32049(98.54)   |                          |
| $\geq 65$                     | 37622(37.47) | 1033(2.75)    | 36589(97.25)   |                          |
| <b>Driver licence</b>         |              |               |                |                          |
| Licensed                      | 86007(85.65) | 1609(1.87)    | 84398(98.13)   | 0.01                     |
| Unlicensed                    | 14404(14.35) | 316(2.19)     | 14088(97.81)   |                          |
| <b>Alcohol use for driver</b> |              |               |                |                          |
| No                            | 86322(85.97) | 1512(1.75)    | 84810(98.25)   | <0.01                    |
| Yes                           | 14089(14.03) | 413(2.93)     | 13676(97.07)   |                          |
| <b>Months</b>                 |              |               |                |                          |
| Spring/summer                 | 47671(47.48) | 914(1.92)     | 46757(98.08)   | 0.99                     |
| Autumn/winter                 | 52740(52.52) | 1011(1.92)    | 51729(98.08)   |                          |
| <b>Crash location</b>         |              |               |                |                          |
| Rural                         | 10475(10.43) | 352(3.36)     | 10123(96.64)   | <0.01                    |
| Urban                         | 89936(89.57) | 1573(1.75)    | 88363(98.25)   |                          |
| <b>Crash partner</b>          |              |               |                |                          |
| Motorcycle                    | 33221(33.09) | 643(1.94)     | 32578(98.06)   | <0.01                    |
| Car                           | 45963(45.77) | 801(1.74)     | 45162(98.26)   |                          |
| Taxi                          | 9655(9.62)   | 208(2.15)     | 9447(97.85)    |                          |
| Heavy vehicles                | 11572(11.52) | 356(3.08)     | 11216(96.92)   |                          |
| <b>Pedestrian's movement</b>  |              |               |                |                          |
| Facing traffic                | 9704(9.66)   | 172(1.77)     | 9532(98.23)    | <0.01                    |
| Back to traffic               | 24584(24.48) | 623(2.53)     | 23961(97.47)   |                          |
| Crossing                      | 66123(65.85) | 1130(1.71)    | 64993(98.29)   |                          |
| <b>Car's manoeuvre</b>        |              |               |                |                          |
| Straight                      | 50836(50.63) | 862(1.70)     | 49974(98.30)   | <0.01                    |

|                | N            | Fatal<br>n(%) | Injury<br>n(%) | $\chi^2$ test<br>p-value |
|----------------|--------------|---------------|----------------|--------------------------|
| Changing lane  | 15625(15.56) | 257(1.64)     | 15368(98.36)   |                          |
| Overtaking     | 21339(21.25) | 601(2.82)     | 20738(97.18)   |                          |
| Turning        | 12611(12.56) | 205(1.63)     | 12406(98.37)   |                          |
| Sunset         |              |               |                |                          |
| Sunset         | 8325(8.29)   | 214(2.57)     | 8109(97.41)    | <0.01                    |
| Other daytimes | 87056(86.70) | 1596(1.83)    | 85460(98.17)   |                          |
| Sunrise        | 5030(5.01)   | 115(2.29)     | 4915(97.71)    |                          |
| Weekdays       |              |               |                |                          |
| Weekday        | 70366(70.08) | 1267(1.80)    | 69099(98.20)   | <0.01                    |
| Weekend        | 30045(29.92) | 658(2.19)     | 29387(97.81)   |                          |

282

283 Using chi-square tests, the following variables were determined to be significantly  
 284 associated with the outcome: sun glare; pedestrian and driver sex and age; driver  
 285 license possession, alcohol consumption; crash month, location, and partner;  
 286 pedestrian movement; car manoeuvre; sunset hours; and day of the week. These  
 287 factors were then incorporated into the mixed logit models.

288 Table 2 presents the estimation results of the mixed logit model of pedestrian  
 289 injury severity. Parameters that were determined to be random were those that  
 290 produced statistically significant standard errors for the assumed distributions; in this  
 291 study, random parameters were male motorists and heavy vehicle as crash partners,  
 292 with a uniform distribution that appears to provide the best statistical fit.

293

294 Table 2: Mixed logit estimation results for pedestrian injury severity during the period  
 295 2003–2016<sup>a</sup> (n = 100,411).

| Variable | Parameter | Standard<br>error | t-value |
|----------|-----------|-------------------|---------|
|----------|-----------|-------------------|---------|

| Fatal injury                                        |        |       |       |
|-----------------------------------------------------|--------|-------|-------|
| Fixed parameter                                     |        |       |       |
| Constant                                            | -0.531 | 0.215 | -2.47 |
| Sun-glare-related crash                             | 0.527  | 0.164 | 3.21  |
| Pedestrians facing traffic                          | -0.304 | 0.110 | -2.76 |
| Pedestrians aged 65+                                | 0.553  | 0.237 | 2.33  |
| Motorists aged 65+                                  | 0.218  | 0.102 | 2.14  |
| Rural roadways                                      | 0.985  | 0.251 | 3.92  |
| Intoxicated motorist                                | 0.606  | 0.213 | 2.85  |
| Weekend                                             | 0.134  | 0.053 | 2.53  |
| Car overtaking manoeuvre                            | 0.472  | 0.132 | 3.58  |
| Sunset                                              | 0.162  | 0.074 | 2.19  |
| Random parameter                                    |        |       |       |
| Male motorists                                      | 0.324  | 0.139 | 2.33  |
| Standard deviation of distribution                  | 0.389  | 0.163 | 2.39  |
| Heavy vehicles                                      | 0.274  | 0.110 | 2.49  |
| Standard deviation of distribution                  | 0.622  | 0.290 | 2.14  |
| Restricted log-likelihood (constant only): -8,267.1 |        |       |       |
| Log-likelihood at convergence: -5,806.4             |        |       |       |
| $\rho^2=0.298$                                      |        |       |       |

296 <sup>a</sup> The outcome “injury” is the baseline case with its parameters set at zero.

297

298 Considering the results listed in Table 2, sun-glare-related crashes was found to  
 299 be significant, and the estimated parameter was fixed across the observed pedestrians  
 300 (the standard error for this parameter, when allowed to be random, was statistically  
 301 nonsignificant). The parameter implies that sun a sun-glared-related crash was more  
 302 likely to result in fatal injuries among pedestrians than a nonglare-related crash. Other  
 303 factors discovered to have fixed effects on observed pedestrians and increase the  
 304 likelihood of fatal injuries were pedestrians aged 65 or older, motorists aged 65 years  
 305 or older, rural roadways, intoxicated motorist, weekend, car overtaking manoeuvre,

1  
2  
3  
4 306 and sunset hours.  
5  
6

7 307 The parameter for the variable of male motorist appeared to be random, with a  
8  
9  
10 308 normal distribution with a mean of 0.324 and standard deviation of 0.389 (see Table  
11  
12  
13 309 2), indicating that individual pedestrians being struck by male motorists had different  
14  
15  
16 310 parameters. Given the estimates (a mean of 0.324 and standard deviation of 0.389),  
17  
18  
19 311 approximately 79.8% of all pedestrians had a higher probability of sustaining fatal  
20  
21  
22 312 injuries when all other variables remain constant. Another parameter found to have a  
23  
24  
25 313 random effect across the sample of pedestrians was the variable of a heavy vehicle as  
26  
27  
28 314 the crash partner (with a normal distribution). This parameter had a mean of 0.274 and  
29  
30  
31 315 standard deviation of 0.622 (see Table 2), indicating that individual pedestrians struck  
32  
33  
34 316 by heavy vehicles have different parameters, with 67.0% of the distributions resulting  
35  
36  
37 317 in a positive parameter (increasing the likelihood of fatal injuries) and 33.0% resulting  
38  
39  
40 318 in negative parameter (decreasing the likelihood of fatal injuries).  
41  
42

43 319 The direction of travel of pedestrians relative to vehicular traffic was also  
44  
45  
46 320 discovered to significantly affect pedestrian fatalities. This fixed parameter suggests  
47  
48  
49 321 that pedestrians who faced traffic while walking were less likely to sustain fatal  
50  
51  
52 322 injuries than those undertaking other movements, such as walking back to traffic or  
53  
54  
55 323 crossing the street.  
56  
57

58 324 Table 3 presents the estimation results of the mixed logit model of pedestrian  
59  
60

1  
2  
3  
4 325 injury severity specifically in sun-glare-related crashes. For this model, the only  
5  
6  
7 326 random parameter (with a uniform distribution) was significant for the variable of  
8  
9  
10 327 heavy vehicle as the crash partner. The heterogeneous effect indicates that certain  
11  
12  
13 328 crashes involving heavy vehicles were associated with both higher and lower  
14  
15  
16 329 likelihoods of pedestrians sustaining fatal injuries. We speculate that this  
17  
18  
19 330 heterogeneous effect may be caused by variance in the experience level among certain  
20  
21  
22 331 driver groups, with more experienced drivers exhibiting a decreased likelihood of  
23  
24  
25 332 causing fatal injuries. In other words, heavy vehicles are normally operated by  
26  
27  
28 333 professional drivers, with the majority of drivers in this group being men and  
29  
30  
31 334 middle-aged or older individuals. To confirm this speculation, the interaction between  
32  
33  
34 335 the variable of heavy vehicle and other variables, such as male and middle-aged or  
35  
36  
37 336 older motorists, were added to the model specification, but were dropped from the  
38  
39  
40 337 model because all were determined to be insignificantly different from zero at the 0.1  
41  
42  
43 338 level. The heterogeneity identified for the variable of heavy vehicle presented another  
44  
45  
46 339 argument in favour of estimating a mixed logit model of pedestrian injury severity  
47  
48  
49 340 because such effects are difficult to identify when using a logit framework with  
50  
51  
52 341 numerous interaction terms.

53  
54 342  
55  
56 343 Table 3: Mixed logit estimation results for pedestrian injury severity with interaction  
57  
58 344 terms of glare crashes and other variables <sup>a</sup> (n = 100,411)

| Variable | Parameter | Standard error | t-value |
|----------|-----------|----------------|---------|
|----------|-----------|----------------|---------|

| Fatal injury                               |        |       |       |
|--------------------------------------------|--------|-------|-------|
| Fixed parameter                            |        |       |       |
| Constant                                   | -0.324 | 0.139 | -2.33 |
| Male motorist                              | 0.193  | 0.069 | 2.80  |
| Sunset                                     | 0.274  | 0.089 | 3.08  |
| Pedestrians facing traffic × glare crashes | -0.439 | 0.126 | -3.48 |
| Pedestrians aged 65+                       | 0.533  | 0.210 | 2.54  |
| Motorists aged 65+ × glare crashes         | 0.432  | 0.143 | 3.02  |
| Rural roadways × glare crashes             | 0.684  | 0.190 | 3.60  |
| Intoxicated motorist                       | 0.461  | 0.154 | 2.99  |
| Weekend                                    | 0.157  | 0.075 | 2.09  |
| Car overtaking manoeuvre                   | 0.329  | 0.121 | 2.72  |
| Random parameter                           |        |       |       |
| Heavy vehicle as crash partner             | 0.248  | 0.089 | 2.78  |
| Standard deviation of distribution         | 0.526  | 0.211 | 2.49  |

Restricted log-likelihood (constant only): -7,302.7

Log-likelihood at convergence: -5,054.6

$\rho^2=0.308$

345 <sup>a</sup> The outcome “injury” is constituted the baseline, with its parameters set at zero

346

347 This mixed logit model with the interaction term of glare crashes with other  
 348 variables highlight several crucial features of glare crashes. For example, several  
 349 interaction terms were discovered to be significant and fixed across the observed  
 350 pedestrians, including facing traffic × glare crashes, elderly motorists × glare crashes,  
 351 and rural roadways × glare crashes. It appears that facing traffic in a glare-related  
 352 crash was determined to be a protective factor in reducing pedestrian fatalities.  
 353 Injuries to pedestrians were more likely to be fatal in glare crashes in which the  
 354 drivers were elderly. Furthermore, in glare crashes that took place in rural setting,  
 355 injuries were more likely to be fatal than otherwise.

1  
2  
3  
4 356 **Discussions**  
5  
6

7 357  
8  
9

10 358 By using the National Traffic Crash Data and sunrise and sunset data from the  
11  
12  
13 359 NOAA, the present study examined whether sun glare was associated with pedestrian  
14  
15  
16 360 fatalities involved in motor vehicle crashes. This research may constitute a valuable  
17  
18  
19 361 contribution to the growing literature on pedestrian safety as well as fill a major  
20  
21  
22 362 research gap regarding the effect of sun glare on pedestrian fatalities. Regarding  
23  
24  
25 363 methodological contributions, the proposed models offer methodological flexibility  
26  
27  
28 364 for identifying individual-specific heterogeneity that may arise as a result of other  
29  
30  
31 365 unmeasured factors related to motorist experience, behaviour, and geometric  
32  
33  
34 366 characteristics. When developing intervention strategies for improving pedestrian  
35  
36  
37 367 safety in sun-glare conditions, the heterogeneous effects of certain variables (which  
38  
39  
40 368 cannot be uncovered by using traditional logit models) should be considered.  
41  
42

43 369 The empirical contributions of this research comprise those research findings that  
44  
45  
46 370 are related to the factors affecting pedestrian fatalities. The identification of these risk  
47  
48  
49 371 factors may provide policy-makers with information for establishing suitable policies  
50  
51  
52 372 and strategies that may further reduce the risk of crashes in general or severity in  
53  
54  
55 373 particular. The following findings merit further discussion.  
56  
57

58 374 Most drivers commute during hours of extreme sun glare. It is therefore not  
59  
60



1  
2  
3  
4 375 surprising that more crashes occurs on roadways where there is a significant portion  
5  
6  
7 376 of traffic during peak morning (sunrise) and afternoon (sunset) hours. The adverse  
8  
9  
10 377 effect of sun glare on crash occurrence has been well documented in relevant  
11  
12  
13 378 literature.<sup>3 14</sup> Mitra<sup>3</sup> pointed out that motorist injury severity, however, was not  
14  
15  
16 379 increased in glare conditions, possibly as a consequence of reduced travel speed.<sup>8</sup>  
17  
18  
19 380 Such a protective effect of sun glare on the associated motorist injury severity does  
20  
21  
22 381 not apply to pedestrians; our study concludes that glare conditions (as indicated in the  
23  
24  
25 382 overall model) were associated with pedestrian fatalities. In our study, it is evident  
26  
27  
28 383 that this adverse effect of sun glare was greater on rural roadways where collision  
29  
30  
31 384 impacts can be higher and motorists may not expect to encounter a pedestrian as much  
32  
33  
34 385 as they would on urban roadways. One commonly-adopted engineering measure is the  
35  
36  
37 386 use of variable message signs to warn drivers of the risk of sun glare at the times  
38  
39  
40 387 when and locations (i.e., rural roadways) where sun-glare conditions occur.<sup>9</sup>

41  
42  
43 388 Mitra<sup>3</sup> pointed out that the odds of glare causing crashes at intersections were  
44  
45  
46 389 higher during the morning hours, and in autumn and winter months in Arizona,  
47  
48  
49 390 United States. In our study, the effect of seasons on pedestrian fatalities was not  
50  
51  
52 391 significant. Adding to the research conducted by Hagita and Mori<sup>22</sup>, who concluded  
53  
54  
55 392 that the rate of pedestrian crashes shortly after sunset was higher than that of any  
56  
57  
58 393 other time in Japan, our study revealed that compared with sunrise times, the adverse  
59  
60

1  
2  
3  
4 394 effect of sun glare on pedestrian fatalities was greater during sunset hours in Taiwan.  
5  
6  
7 395 It is therefore evident here that sun glare during the sunset hours may not only  
8  
9  
10 396 increase pedestrian crashes, as indicated by Hagita and Mori<sup>22</sup>, but also the resulting  
11  
12  
13 397 injury severity. Evening commute is often risky due to fatigue, distraction, or other  
14  
15  
16 398 unrelated factors to sun glare. In our study, we have found that injuries sustained by  
17  
18  
19 399 pedestrians were more likely to be fatal under sunset conditions than other daytime  
20  
21  
22 400 conditions. Additional research is warranted to examine whether sun glare affects  
23  
24  
25 401 pedestrian fatalities in evening commuting crashes.

26  
27  
28 402 Studies have suggested that intoxicated motorists were more likely to leave  
29  
30  
31 403 pedestrians unattended by leaving the crash scene, thereby increasing pedestrian  
32  
33  
34 404 injury severity; and furthermore, alcohol use has been discovered to be a more  
35  
36  
37 405 prevalent factor for hit-and-runs at nights and during the weekend.<sup>23 24</sup> Our study  
38  
39  
40 406 revealed that the combined effects of alcohol consumption and sun glare were  
41  
42  
43 407 associated with pedestrian fatalities. Similar to other studies<sup>23 24</sup>, our research  
44  
45  
46 408 highlights, in particular, the effect of motorist alcohol consumption on fatal injuries  
47  
48  
49 409 and on the weekends.

50  
51  
52 410 Other studies have consistently reported that elderly motorists were the group  
53  
54  
55 411 most affected by sun glare. For example, two simulation studies conducted by Gray  
56  
57  
58 412 and Regan<sup>6</sup> and Theeuwes et al.<sup>7</sup> reported that in conditions of sun glare, older drivers  
59  
60

1  
2  
3  
4 413 executing a turning manoeuvre demonstrated a significantly greater reduction in  
5  
6  
7 414 safety margin than did younger drivers; and older drivers demonstrated the most  
8  
9  
10 415 significant decrease in the ability to successfully detect pedestrians. Studies analysing  
11  
12  
13 416 real-life police-reported crash data<sup>15</sup> have indicated that in conditions of sun glare,  
14  
15  
16 417 older drivers were more likely to strike other vehicles. Our study contributes to the  
17  
18  
19 418 literature on pedestrian safety literature by concluding that older motorists, when  
20  
21  
22 419 affected by sun glare, cause fatal injuries to pedestrians once a crash has occurred.  
23  
24  
25 420 Advance warning signs or educational efforts to increase older driver's awareness of  
26  
27  
28 421 sun-glare conditions may either temper the likelihood of vehicle crashes or reduce  
29  
30  
31 422 pedestrian injury severity.

32  
33  
34 423 In our study, no discrepancy was found when comparing injuries in  
35  
36  
37 424 spring/summer to autumn/winter. Such a result cannot be ascertained with any  
38  
39  
40 425 certainty. However, we speculate that this is primarily because the anticipated effect  
41  
42  
43 426 of sun glare in different seasons may be offset by, for example, tropical hurricanes  
44  
45  
46 427 that strike Taiwan in summer and northeast monsoon in winter. Our result here seems  
47  
48  
49 428 different to those in other studies conducted in large countries<sup>3</sup> where the adverse  
50  
51  
52 429 effect of sun glare was found to be greater in autumn and winter months. These  
53  
54  
55 430 studies were conducted in large countries such as the United States where climate  
56  
57  
58 431 changes significantly across areas with different latitudes, whereas Taiwan is a small  
59  
60

1  
2  
3  
4 432 country where climate does not change much across the small island.  
5  
6

7 433 Considerable work has consistently concluded that older pedestrians were more  
8  
9  
10 434 likely to be fatally or severely injured in crashes, both during daytime and night  
11  
12  
13 435 conditions.<sup>25</sup> Our research has provided ample evidence to suggest that injuries  
14  
15  
16 436 sustained by older pedestrians in crashes caused by sun glare are more fatal than those  
17  
18  
19 437 sustained by younger pedestrians. It is unclear whether the reduced conspicuity of  
20  
21  
22 438 pedestrians (particularly older pedestrians) under conditions of sun glare (twilight)  
23  
24  
25 439 plays a role in this effect. However, enhancing the conspicuity of pedestrians through  
26  
27  
28 440 the use of visibility aids, not only in night conditions<sup>26</sup> but also in twilight conditions,  
29  
30  
31 441 may be beneficial for reducing crash risk or severity.  
32  
33

34 442 Adding to the research conducted by Sun et al.<sup>14</sup>, who reported that crashes related  
35  
36  
37 443 to improper turning or lane changing were more likely to occur during periods of sun  
38  
39  
40 444 glare, this present study concludes that an association exists between the execution of  
41  
42  
43 445 overtaking manoeuvres during periods of sun glare and pedestrian fatalities. It is not  
44  
45  
46 446 uncommon for injuries sustained in crashes caused by vehicle overtaking to be severe  
47  
48  
49 447 because motorists must accelerate to overtake other vehicles. In Taiwan, it is common  
50  
51  
52 448 that motorists execute overtaking manoeuvres by using roadway shoulders where  
53  
54  
55 449 there are pedestrians. Motorists should be aware of the risk they pose to pedestrians  
56  
57  
58 450 when overtaking other vehicles, particularly during periods of sun glare.  
59  
60

1  
2  
3  
4 451 Studies have reported that facing traffic is beneficial for preventing pedestrian  
5  
6  
7 452 crashes<sup>27</sup> and decreasing the severity of related injuries<sup>25</sup>. Our study complements  
8  
9  
10 453 these two studies by concluding that walking against the traffic was associated with  
11  
12  
13 454 decreased injury severity. In these cases, it is possible that pedestrians' forward views  
14  
15  
16 455 are strongly lit, which might be more favourable for them than other directions.  
17  
18  
19 456 Information expressing the necessity facing traffic while walking along a street,  
20  
21  
22 457 particularly in conditions of sun glare, should be supplemented with specific  
23  
24  
25 458 information regarding its safety benefits.

26  
27  
28 459 Although differing for observed pedestrians, being struck by heavy vehicles  
29  
30  
31 460 increased the likelihood of fatal injuries. Although this finding agrees with those of  
32  
33  
34 461 other studies<sup>28 29</sup> reporting the tendency of injuries sustained by pedestrians to be fatal  
35  
36  
37 462 or more severe when struck by a heavy vehicle, we concluded that the effect of heavy  
38  
39  
40 463 vehicles was greater in conditions of sun glare. Notably, drivers of heavy vehicles  
41  
42  
43 464 tend to be professional. It is unclear whether drivers of this particular group, in  
44  
45  
46 465 combination with undertaking longer hours of travel than those undertaken by a car  
47  
48  
49 466 driver, are more susceptible to problems related to sun glare. Educational efforts can  
50  
51  
52 467 be directed towards drivers of heavy vehicles regarding their susceptibility to sun  
53  
54  
55 468 glare, and on roadways with pedestrians in particular.

56  
57  
58 469 This study had the following research limitations. First, our study did not consider  
59  
60

1  
2  
3  
4 470 surrounding topography; it is possible that motorists travelling through some areas  
5  
6  
7 471 with buildings or mountains, for example, are less susceptible to sun glare because the  
8  
9  
10 472 sun is occluded. By analysing geographic data and data from police reports, likely  
11  
12  
13 473 locations for sun glare can be predicted, and motorists can be well informed regarding  
14  
15  
16 474 where to expect sun glare. Furthermore, we classified a crash as being glare-related  
17  
18  
19 475 when the angular distance between the driver's line of sight and the sun was between  
20  
21  
22 476 0° and 45°, a threshold based on the research in Japan<sup>13</sup>. Further research may attempt  
23  
24  
25 477 to compare our results to those adopting more stringent thresholds of 10, 20, or 30  
26  
27  
28 478 degrees, as well as the variance of this effect for motorists of different ages, as  
29  
30  
31 479 indicated by Jurado-Piña and Pardillo Mayora<sup>9</sup>. Due to restricted funds, we were just  
32  
33  
34 480 able to link the National Traffic Crash Dataset to the NOAA, but not to pre-hospital  
35  
36  
37 481 triage system or hospital data (e.g., the National Health Insurance Research Dataset:  
38  
39  
40 482 NHIRD). We recommend that future research should link our data to clinical datasets  
41  
42  
43 483 that provide more details on injuries (e.g., injured body regions, hospitalisation) other  
44  
45  
46 484 than fatalities examined in the present paper.

47  
48  
49 485 Indeed, sun glare is a combined spatial-temporal factor. To broaden our collective  
50  
51  
52 486 understanding of factors in pedestrian safety, it is paramount that additional spatial  
53  
54  
55 487 data and temporal data be collected and compared whenever possible. Finally, the  
56  
57  
58 488 empirical results obtained in this study may be unique to Taiwan because of its unique  
59  
60

1  
2  
3  
4 489 sunrise and sunset times and orientations. As a result, until additional analyses are  
5  
6  
7 490 conducted using data from other jurisdictions to determine whether sun glare is a  
8  
9  
10 491 salient factor to pedestrian fatalities, caution should be exercised in generalising our  
11  
12  
13 492 findings for application in other settings.

14  
15 493

16  
17 494 **Contributors:** HPM drafted and revised the manuscript and established the  
18  
19  
20 495 theoretical supports for data analyses; PLC re-analysed the data and interpreted the  
21  
22  
23 496 results; SKC reviewed relevant literature and analysed the data; LHC analysed the  
24  
25  
26 497 data; VL edited the manuscript and reviewed relevant literature; CWP was  
27  
28  
29 498 responsible for study design, contributed to the analyzing and interpretation of data,  
30  
31  
32 499 drafted the manuscript, and strengthened discussions and conclusions. The final  
33  
34  
35 500 version of the manuscript was read and approved by each contributing author.

36  
37  
38 501

39  
40  
41 502 **Competing interests:** None declared.

42  
43  
44 503

45  
46  
47 504 **Funding:** This study was financially supported by grants from the Ministry of  
48  
49  
50 505 Science and Technology, Taiwan (MOST 105-2221-E-038-013-MY3) and Yuan's  
51  
52  
53 506 General Hospital and Taipei Medical University (106YGH-TMU-07). The funders  
54  
55  
56 507 had no role in the design of the study, data collection and analysis, interpretation of  
57  
58  
59 508 data, or preparation of the manuscript. Vaclav Linkov was supported by the Ministry

1  
2  
3  
4 509 of Education, Youth and Sports within National Sustainability Programme I, a project  
5  
6  
7 510 of Transport R&D Centre (LO1610), on a research infrastructure acquired from the  
8  
9  
10 511 Operation Programme Research and Development for Innovations  
11  
12  
13 512 (CZ.1.05/2.1.00/03.0064).  
14  
15

16 513

17  
18  
19 514 **Data sharing statement:** Only citizens of Taiwan who fulfill the requirements of  
20  
21  
22 515 conducting research projects are eligible to apply for the dataset. The use of dataset is  
23  
24  
25 516 limited to research purposes only. The authors had no special access privileges that  
26  
27  
28 517 others would not have.  
29

30 518

### 31 519 **Reference**

32 520

- 33  
34  
35 521 1. Owsley C, Mcgwin G Jr. Vision and driving. *Vision Research* 2010; 50(23):  
36 522 2348-2361.  
37  
38 523 2. Tversky A, Kahneman D. Judgment under uncertainty heuristics and biases.  
39 524 *Science* 1974; 185(4157): 1124-1131.  
40  
41 525 3. Mitra S. Sun glare and road safety: an empirical investigation of intersection  
42 526 crashes. *Safety Science* 2014; 70: 246-254.  
43  
44 527 4. Redelmeier DA, Tibshirani R. Why cars in the next lane seem to go faster.  
45 528 *Nature* 1999; 401: 35-36.  
46  
47 529 5. Redelmeier DA, Raza S. Optical illusions and life-threatening traffic crashes: a  
48 530 perspective on aerial perspective. *Medical Hypotheses* 2018; 114: 23-27.  
49  
50 531 6. Gray R, Regan D. Glare susceptibility test results correlate with temporal safety  
51 532 margin when executing turns across approaching vehicles in simulated low-sun  
52 533 conditions. *Ophthalmic and Physiological Optics* 2007; 27(5): 440-450.  
53  
54 534 7. Theeuwes J, Alferdinck JW, Perel M. Relation between glare and driving  
55 535 performance. *Human Factors* 2002; 44(1): 95-107.  
56  
57 536 8. Churchill AM, Tripodis Y, Lovell DJ. Sun glare impacts on freeway congestion:  
58 537 geometric model and empirical analysis. *Journal of Transportation Engineering*  
59  
60



- 1  
2  
3 538 2012; 138: 1196-1204.
- 4  
5 539 9. Jurado-Piña R, Pardillo Mayora JM. Methodology to predict driver vision  
6 540 impairment situations caused by sun glare. *Transportation Research Record:*  
7 541 *Journal of the Transportation Research Board* 2009; 2120.: 12-17.
- 8  
9 542 10. Anue K. *Sun glare detection and visualization*. 2017. Master's degree in  
10 543 Computer Science. Department of Computer Science. Norwegian University of  
11 544 Science and Technology, 2017.
- 12  
13 545 11. Redelmeier DA, Raza S. Life-threatening motor vehicle crashes in bright  
14 546 sunlight. *Medicine* 2017; 96(1): e5710.
- 15  
16 547 12. Mitra S, Washington S. *On the significance of omitted variables in intersection*  
17 548 *crash modeling*. *Accident Analysis and Prevention* 2012; 49: 439-448.
- 18  
19 549 13. Hagita K, Mori K. The effect of sun glare on traffic accidents in Chiba  
20 550 prefecture, Japan. *Asian Transport Studies* 2014; 3(2): 205-219.
- 21  
22 551 14. Sun D, El-Basyouny K, Kwon TJ. Sun glare: Network characterization and  
23 552 safety effects. *Transportation Research Record: Journal of the Transportation*  
24 553 *Research Board* 2018.
- 25  
26 554 15. Choi EH, Santokh S. *Statistical assessment of the glare issue – human and*  
27 555 *natural elements*. Proceeding of 2005 FCSM Conference, Federal Committee on  
28 556 Statistical Methodology, Arlington, VA, 2005; 1-8.
- 29  
30 557 16. National Oceanic Earth System Research Laboratory and Atmospheric  
31 558 Administration. <https://www.esrl.noaa.gov/gmd/grad/solcalc/> Accessed:  
32 559 2018-08-22.
- 33  
34 560 17. Mchugh ML. The chi-square test of independence. *Biochemia Medica* 2013;  
35 561 23(2): 143-149.
- 36  
37 562 18. Barbieri S, Vettore G, Pietrantonio V, Snenghi R, Tredese A, Bergamini M,  
38 563 Previato S, Stefanati A, Gaudio RM, Feltracco P. Pedestrian inattention  
39 564 blindness while playing Pokemon Go as an emerging health-risk behavior: a case  
40 565 report. *Journal of Medical Internet Research* 2017; 19(4): e86.
- 41  
42 566 19. Chen PL, Pai CW. Evaluating the effects of smartphone racing games and other  
43 567 game types on pedestrian's risk-taking inclinations. *Computers in Human*  
44 568 *Behavior* 2018; 88: 78-83.
- 45  
46 569 20. Bhat CR. Quasi-random maximum simulated likelihood estimation of the mixed  
47 570 multinomial logit model. *Transportation Research Part B: Methodological* 2001;  
48 571 35(7): 677-693.
- 49  
50 572 21. Manski CF, Mcfadden DL. *A structural analysis of discrete data with*  
51 573 *econometric applications*. The MIT Press, Cambridge, MA. 1981.
- 52  
53 574 22. Hagita K, Mori K. Traffic accident analysis of sun glare and twilight shortly  
54 575 before and after sunset in Chiba prefecture, Japan. *Journal of the Eastern Asia*

- 1  
2  
3  
4 576 *Society for Transportation Studies* 2015; 11: 1999-2014.
- 5 577 23. Solnick SJ, Hemenway D. Hit the bottle and run: The role of alcohol in  
6 578 hit-and-run pedestrian fatalities. *Journal of Studies on Alcohol and Drugs* 1994;  
7 579 55(6): 679-684.
- 8 580 24. Solnick SJ, Hemenway D. The hit-and-run in fatal pedestrian accidents: victims,  
9 581 circumstances and drivers. *Accident Analysis and Prevention* 1995; 27(5):  
10 582 643-649.
- 11 583 25. Chen PL, Jou RC, Saleh W, Pai CW. Accidents involving pedestrians with their  
12 584 backs to traffic or facing traffic: an evaluation of crash characteristics and  
13 585 injuries. *Journal of Advanced Transportation* 2016; 50(5): 736-751.
- 14 586 26. Kwan I, Mapstone J. Interventions for increasing pedestrian and cyclist visibility  
15 587 for the prevention of death and injuries. *Cochrane Database of Systematic*  
16 588 *Reviews* 2006; (4): CD003438.
- 17 589 27. Luoma J, Peltola H. Does facing traffic improve pedestrian safety? *Accident*  
18 590 *Analysis and Prevention* 2013; 50: 1207-1210.
- 19 591 28. Lefler DE, Gabler HC. The fatality and injury risk of light truck impacts with  
20 592 pedestrians in the united states. *Accident Analysis and Prevention* 2004; 36(2):  
21 593 295-304.
- 22 594 29. Dong B, Ma X, Chen F. Analyzing the injury severity sustained by non-motorists  
23 595 at mid-blocks considering non-motorists' pre-crash behavior. *Transportation*  
24 596 *Research Record: Journal of the Transportation Research Board* 2018; 1-11.
- 25 597  
26 598  
27 599  
28 600  
29 601  
30 602  
31 603

1  
2  
3  
4  
5  
6  
7  
8  
9  
10  
11  
12  
13  
14  
15  
16  
17  
18  
19  
20  
21  
22  
23  
24  
25  
26  
27  
28  
29  
30  
31  
32  
33  
34  
35  
36  
37  
38  
39  
40  
41  
42  
43  
44  
45  
46  
47  
48  
49  
50  
51  
52  
53  
54  
55  
56  
57  
58  
59  
60

Appendix 1: Directions of sunrise and sunset in Taiwan

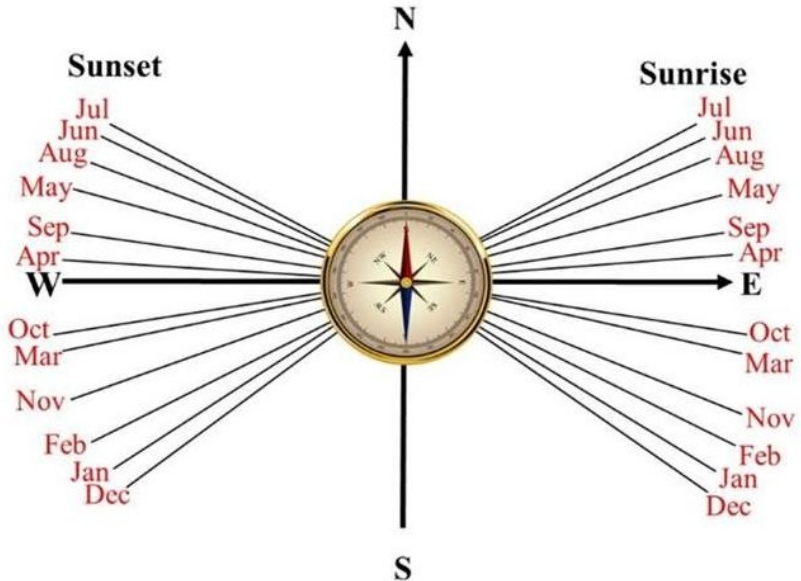

66x49mm (300 x 300 DPI)

Figure 2: Study flow chart

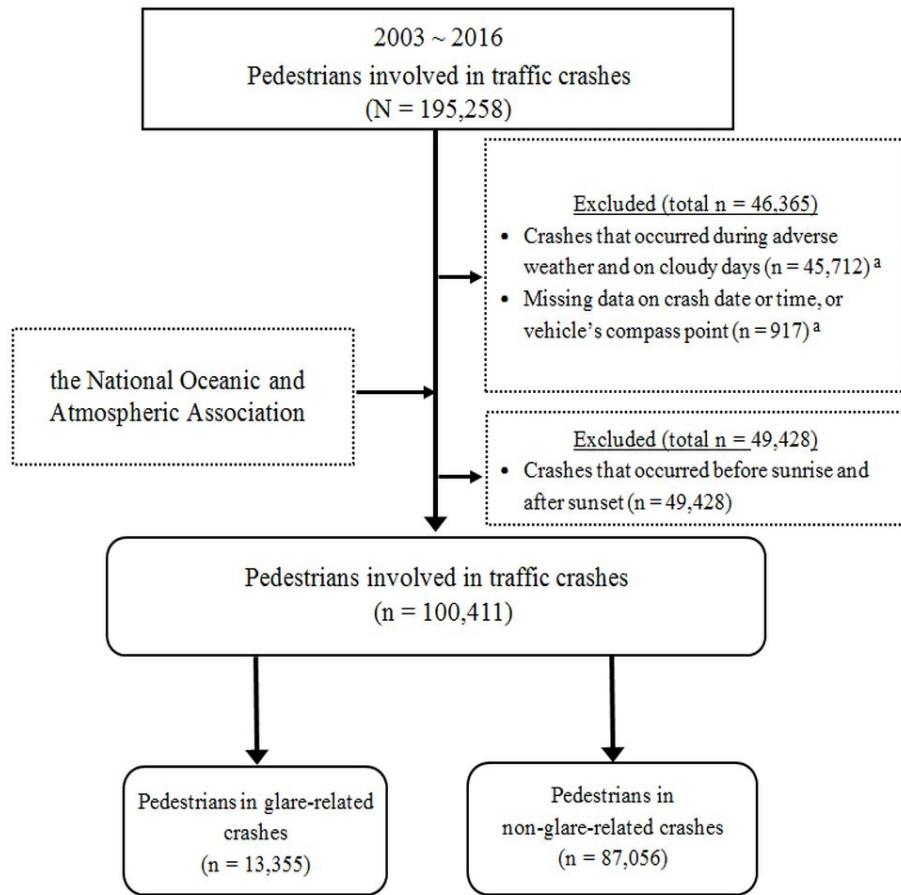

<sup>a</sup> As these cases were not mutually exclusive, the total cases excluded were 45,365.

90x90mm (300 x 300 DPI)

**STROBE Statement**Checklist of items that should be included in reports of *case-control studies*

| Section/Topic             | Item No | Recommendation                                                                                                                                                                             | Reported on Page No |
|---------------------------|---------|--------------------------------------------------------------------------------------------------------------------------------------------------------------------------------------------|---------------------|
| <b>Title and abstract</b> | 1       | (a) Indicate the study's design with a commonly used term in the title or the abstract                                                                                                     | 1                   |
|                           |         | (b) Provide in the abstract an informative and balanced summary of what was done and what was found                                                                                        | 2–3                 |
| <b>Introduction</b>       |         |                                                                                                                                                                                            |                     |
| Background/rationale      | 2       | Explain the scientific background and rationale for the investigation being reported                                                                                                       | 4–6                 |
| Objectives                | 3       | State specific objectives, including any prespecified hypotheses                                                                                                                           | 7                   |
| <b>Methods</b>            |         |                                                                                                                                                                                            |                     |
| Study design              | 4       | Present key elements of study design early in the paper                                                                                                                                    | 8–10                |
| Setting                   | 5       | Describe the setting, locations, and relevant dates, including periods of recruitment, exposure, follow-up, and data collection                                                            | 8–12                |
| Participants              | 6       | (a) <i>Cohort study</i> —Give the eligibility criteria, and the sources and methods of selection of participants. Describe methods of follow-up                                            | 7–9                 |
|                           |         | <i>Case-control study</i> —Give the eligibility criteria, and the sources and methods of case ascertainment and control selection. Give the rationale for the choice of cases and controls |                     |
|                           |         | <i>Cross-sectional study</i> —Give the eligibility criteria, and the sources and methods of selection of participants                                                                      |                     |
| Variables                 | 7       | (b) <i>Cohort study</i> —For matched studies, give matching criteria and number of exposed and unexposed                                                                                   | 11,12               |
|                           |         | <i>Case-control study</i> —For matched studies, give matching criteria and the number of controls per case                                                                                 |                     |
| Data sources/measurement  | 8*      | Clearly define all outcomes, exposures, predictors, potential confounders, and effect modifiers. Give diagnostic criteria, if applicable                                                   | 11,12               |
| Bias                      | 9       | For each variable of interest, give sources of data and details of methods of assessment (measurement). Describe comparability of assessment methods if there is more than one group       | 9                   |
| Study size                | 10      | Describe any efforts to address potential sources of bias                                                                                                                                  | 10                  |
| Quantitative variables    | 11      | Explain how the study size was arrived at                                                                                                                                                  | 10                  |
|                           |         | Explain how quantitative variables were handled in the analyses. If applicable, describe which groupings were chosen and why                                                               | 11,12               |
|                           |         | (a) Describe all statistical methods, including those used to control for confounding                                                                                                      | 12–15               |
|                           |         | (b) Describe any methods used to examine subgroups and interactions                                                                                                                        | 12–15               |
|                           |         | (c) Explain how missing data were addressed                                                                                                                                                | 12–15               |
| Statistical methods       | 12      | (d) <i>Cohort study</i> —If applicable, explain how loss to follow-up was addressed                                                                                                        | 12–15               |
|                           |         | <i>Case-control study</i> —If applicable, explain how matching of cases and controls was addressed                                                                                         |                     |
|                           |         | <i>Cross-sectional study</i> —If applicable, describe analytical methods taking account of sampling strategy                                                                               |                     |
|                           |         | (e) Describe any sensitivity analyses                                                                                                                                                      | N/A                 |

| Section/Topic            | Item No | Recommendation                                                                                                                                                                                               | Reported on Page No |
|--------------------------|---------|--------------------------------------------------------------------------------------------------------------------------------------------------------------------------------------------------------------|---------------------|
| <b>Results</b>           |         |                                                                                                                                                                                                              |                     |
| Participants             | 13*     | (a) Report numbers of individuals at each stage of study—eg numbers potentially eligible, examined for eligibility, confirmed eligible, included in the study, completing follow-up, and analysed            | 10                  |
|                          |         | (b) Give reasons for non-participation at each stage                                                                                                                                                         | 10                  |
|                          |         | (c) Consider use of a flow diagram                                                                                                                                                                           | Appendix 2          |
| Descriptive data         | 14*     | (a) Give characteristics of study participants (eg demographic, clinical, social) and information on exposures and potential confounders                                                                     | 10                  |
|                          |         | (b) Indicate number of participants with missing data for each variable of interest                                                                                                                          | 10                  |
|                          |         | (c) <i>Cohort study</i> —Summarise follow-up time (eg, average and total amount)                                                                                                                             | N/A                 |
| Outcome data             | 15*     | <i>Cohort study</i> —Report numbers of outcome events or summary measures over time                                                                                                                          | N/A                 |
|                          |         | <i>Case-control study</i> —Report numbers in each exposure category, or summary measures of exposure                                                                                                         | N/A                 |
|                          |         | <i>Cross-sectional study</i> —Report numbers of outcome events or summary measures                                                                                                                           | 15                  |
| Main results             | 16      | (a) Give unadjusted estimates and, if applicable, confounder-adjusted estimates and their precision (eg, 95% confidence interval). Make clear which confounders were adjusted for and why they were included | 15–21               |
|                          |         | (b) Report category boundaries when continuous variables were categorized                                                                                                                                    | N/A                 |
|                          |         | (c) If relevant, consider translating estimates of relative risk into absolute risk for a meaningful time period                                                                                             | N/A                 |
| Other analyses           | 17      | Report other analyses done—eg analyses of subgroups and interactions, and sensitivity analyses                                                                                                               | N/A                 |
| <b>Discussion</b>        |         |                                                                                                                                                                                                              |                     |
| Key results              | 18      | Summarise key results with reference to study objectives                                                                                                                                                     | 22–29               |
| Limitations              | 19      | Discuss limitations of the study, taking into account sources of potential bias or imprecision. Discuss both direction and magnitude of any potential bias                                                   | 27–29               |
| Interpretation           | 20      | Give a cautious overall interpretation of results considering objectives, limitations, multiplicity of analyses, results from similar studies, and other relevant evidence                                   | 27–29               |
| Generalisability         | 21      | Discuss the generalisability (external validity) of the study results                                                                                                                                        | 28–29               |
| <b>Other Information</b> |         |                                                                                                                                                                                                              |                     |
| Funding                  | 22      | Give the source of funding and the role of the funders for the present study and, if applicable, for the original study on which the present article is based                                                | 29                  |

\*Give information separately for cases and controls in case-control studies and, if applicable, for exposed and unexposed groups in cohort and cross-sectional studies.

**Note:** An Explanation and Elaboration article discusses each checklist item and gives methodological background and published examples of transparent reporting. The STROBE checklist is best used in conjunction with this article (freely available on the Web sites of PLoS Medicine at <http://www.plosmedicine.org/>, Annals of Internal Medicine at <http://www.annals.org/>, and Epidemiology at <http://www.epidem.com/>). Information on the STROBE Initiative is available at [www.strobe-statement.org](http://www.strobe-statement.org).

# BMJ Open

## Population-based case-control study of the effect of sun glare on pedestrian fatalities in Taiwan

|                                 |                                                                                                                                                                                                                                                                                                                                                                                                                                                                                                                                                                                                                                                                                                        |
|---------------------------------|--------------------------------------------------------------------------------------------------------------------------------------------------------------------------------------------------------------------------------------------------------------------------------------------------------------------------------------------------------------------------------------------------------------------------------------------------------------------------------------------------------------------------------------------------------------------------------------------------------------------------------------------------------------------------------------------------------|
| Journal:                        | <i>BMJ Open</i>                                                                                                                                                                                                                                                                                                                                                                                                                                                                                                                                                                                                                                                                                        |
| Manuscript ID                   | bmjopen-2018-028350.R2                                                                                                                                                                                                                                                                                                                                                                                                                                                                                                                                                                                                                                                                                 |
| Article Type:                   | Research                                                                                                                                                                                                                                                                                                                                                                                                                                                                                                                                                                                                                                                                                               |
| Date Submitted by the Author:   | 25-Jul-2019                                                                                                                                                                                                                                                                                                                                                                                                                                                                                                                                                                                                                                                                                            |
| Complete List of Authors:       | Ma, Hon-Ping; Shuang Ho Hospital - Taipei Medical University, Emergency medicine<br>Chen, Ping-Ling; Graduate Institute of Injury Prevention and Control<br>Chen, Shang-Ku; Shuang Ho Hospital - Taipei Medical University, Emergency Medicine; Taipei Medical University, Graduate Institute of Injury Prevention and Control<br>Chen, Liang-Hao; Taipei Medical University, Graduate Institute of Injury Prevention and Control; Wan-Fang Hospital, Taipei Medical University, Department of Emergency Medicine<br>Linkov, Vaclav; Department of Traffic Psychology, CDV, Transport Research Centre<br>Pai, Chih-Wei; Taipei Medical University, Graduate Institute of Injury Prevention and Control |
| <b>Primary Subject Heading</b>: | Epidemiology                                                                                                                                                                                                                                                                                                                                                                                                                                                                                                                                                                                                                                                                                           |
| Secondary Subject Heading:      | Epidemiology, Public health, Health policy                                                                                                                                                                                                                                                                                                                                                                                                                                                                                                                                                                                                                                                             |
| Keywords:                       | ACCIDENT & EMERGENCY MEDICINE, PUBLIC HEALTH, EPIDEMIOLOGY                                                                                                                                                                                                                                                                                                                                                                                                                                                                                                                                                                                                                                             |
|                                 |                                                                                                                                                                                                                                                                                                                                                                                                                                                                                                                                                                                                                                                                                                        |

SCHOLARONE™  
Manuscripts

1  
2  
3  
4 **1 Population-based case–control study of the effect of sun glare on pedestrian**  
5  
6  
7 **2 fatalities in Taiwan**  
8  
9

10 3 Hon-Ping Ma <sup>a, b, c</sup>, Ping-Ling Chen <sup>a</sup>, Shang-Ku Chen <sup>a, b</sup>, Liang-Hao Chen <sup>a, d</sup>, Václav  
11  
12  
13 4 Linkov <sup>e</sup>, Chih-Wei Pai <sup>a, \*</sup>  
14  
15

16 5 <sup>a</sup> Graduate Institute of Injury Prevention and Control, College of Public Health, Taipei  
17  
18  
19 6 Medical University, Taiwan  
20  
21

22 7 <sup>b</sup> Department of Emergency Medicine, Shuang–Ho Hospital, Taipei Medical  
23  
24  
25 8 University, Taiwan  
26  
27

28 9 <sup>c</sup> Department of Emergency Medicine, School of Medicine, Taipei Medical  
29  
30  
31 10 University, Taiwan  
32  
33

34 11 <sup>d</sup> Department of Emergency Medicine, Wan–Fang Hospital, Taipei Medical  
35  
36  
37 12 University, Taiwan  
38  
39

40 13 <sup>e</sup> Department of Traffic Psychology, CDV–Transport Research Centre, Brno, Czech  
41  
42  
43 14 Republic  
44  
45

46 15 \* Corresponding author  
47  
48

49 16 Email: [cpai@tmu.edu.tw](mailto:cpai@tmu.edu.tw)  
50  
51

52 17 +886 02-27361661 ext.6575  
53  
54

55 18 Address: Graduate Institute of Injury Prevention and Control, College of Public  
56  
57  
58 19 Health, Taipei Medical University, 250 Wuxing St, Taipei City, Taiwan 110.  
59  
60



1  
2  
3  
4 20 **Word count: 4712**  
5  
6

7 21  
8  
9

10 22 **Abstract**  
11  
12

13 23 **Objectives** Sun glare is a serious driving hazard and increases crash risks. Relatively  
14  
15  
16 24 few studies have examined the effects of sun glare on pedestrian fatalities, given that  
17  
18  
19 25 a crash has occurred. The primary objective of this study was to investigate the effect  
20  
21  
22 26 of sun glare on pedestrian fatalities.  
23  
24

25 27 **Design** A population-based case-control study.  
26  
27

28 28 **Setting** Taiwan.  
29  
30

31 29 **Participants** Using the Taiwan National Traffic Crash Data and sunrise and sunset  
32  
33  
34 30 data from the National Oceanic and Atmospheric Administration (NOAA) for the  
35  
36  
37 31 period 2003–2016, 100,411 pedestrians involved in crashes were identified. Of these  
38  
39  
40 32 crashes, 13,355 and 87,056 were glare-related (case) and non-glare-related (control)  
41  
42  
43 33 crashes, respectively.  
44  
45

46 34 **Methods** To account for unobserved heterogeneity, mixed logit models were  
47  
48  
49 35 estimated to identify the determinants of pedestrian fatalities.  
50  
51

52 36 **Main outcome measures** Pedestrian fatalities.  
53  
54

55 37 **Results** Pedestrians involved in glare-related crashes were more likely to be fatally  
56  
57  
58 38 injured than those in non-glare-related crashes ( $\beta = 0.527$ ;  $t = 3.21$ ). Other  
59  
60

1  
2  
3  
4 39 contributory factors to fatal injuries among pedestrians were older pedestrians ( $\beta =$   
5  
6  
7 40 0.553;  $t = 2.33$ ), male drivers ( $\beta = 0.324$ ;  $t = 2.33$ ), older drivers ( $\beta = 0.218$ ;  $t = 2.14$ ),  
8  
9  
10 41 intoxicated motorists ( $\beta = 0.606$ ;  $t = 2.85$ ), rural roadways ( $\beta = 0.985$ ;  $t = 3.92$ ),  
11  
12  
13 42 overtaking manoeuvres ( $\beta = 0.472$ ;  $t = 3.58$ ), heavy vehicle crash partners ( $\beta = 0.248$ ;  $t$   
14  
15  
16 43 = 2.78), and sunset hours ( $\beta = 0.274$ ;  $t = 3.08$ ). Walking against traffic appeared  
17  
18  
19 44 beneficial for decreasing injury severity ( $\beta = -0.304$ ;  $t = -2.76$ ).

20  
21  
22 45 **Conclusions** Sun glare is associated with pedestrian fatalities. Older pedestrians, male  
23  
24  
25 46 drivers, older drivers, and intoxicated motorists are prevalent determinants of  
26  
27  
28 47 pedestrian fatalities in glare-related crashes.

29  
30  
31 48 **Keywords:** Sun glare; Pedestrian fatalities; Crashes; Injury  
32  
33

34  
35  
36  
37 49

#### 50 **Strengths and limitations of this study**

- 38  
39  
40 51 ● This is the first nationwide population-based case-control study of the  
41  
42  
43 52 associations between pedestrian fatalities and sun glare.  
44  
45  
46 53 ● Glare-related crashes were defined by adjusting vehicle travel direction and  
47  
48  
49 54 orientations of sunrise and sunset.  
50  
51  
52 55 ● Glare-related crashes were defined when the angular distance between the  
53  
54  
55 56 driver's line of sight and the sun was between 0° and 45°.  
56  
57  
58 57 ● Limitations of this study include data, such as geographic characteristics,  
59  
60

1  
2  
3  
4 58 unavailable in the two datasets.  
5  
6

7 59 **INTRODUCTION**  
8  
9

10 60

11  
12  
13 61 Driving is a highly visual task that involves visual function and processing for  
14  
15  
16 62 establishing effective control over a vehicle.<sup>1</sup> Research<sup>2 3</sup> has suggested that bright  
17  
18  
19 63 sunlight is ideal for driving because it increases the contrast, resolution, and  
20  
21  
22 64 luminosity of the surrounding landscape. As a result, however, drivers may  
23  
24  
25 65 misinterpret the speed at which parts of the surrounding landscape are approaching  
26  
27  
28 66 and underestimate their velocity, prompting them to compensate by accelerating.<sup>4 5</sup>  
29

30  
31 67 Generally, bright sunlight causes temporary blindness when the sun is at a  
32  
33  
34 68 relatively low altitude (i.e., just after sunrise or before sunset when the sun is just  
35  
36  
37 69 above the horizon) and its rays fall directly in an individual's line of sight. Using a  
38  
39  
40 70 simulator, Gray and Regan<sup>6</sup> assessed driving performance in both the absence and  
41  
42  
43 71 presence of a low sun. They reported that sun glare resulted in a significant reduction  
44  
45  
46 72 in the safety margin accepted by drivers, the mean number of crashes was  
47  
48  
49 73 significantly higher during conditions of glare than those without glare, and older  
50  
51  
52 74 drivers exhibited significantly greater reductions in the safety margin than did  
53  
54  
55 75 younger drivers. Another simulation study was conducted by Theeuwes et al.,<sup>7</sup> who  
56  
57  
58 76 reported that low glare resulted in their participants (drivers) exhibiting a significant  
59  
60

1  
2  
3  
4 77 decrease in the ability to detect simulated pedestrians along the roadside. Theeuwes et  
5  
6  
7 78 al.<sup>7</sup> also revealed that older participants reduced their driving speed the most and  
8  
9  
10 79 exhibited the largest decrease in successful pedestrian detection.  
11  
12

13 80 Churchill et al.<sup>8</sup> employed a geometric model to examine whether sun glare affects  
14  
15  
16 81 the speeds of drivers on roadways and concluded that changes in speed as a result of  
17  
18  
19 82 sun glare affected highway congestion. Jurado-Piña and Pardillo Mayora,<sup>9</sup> in an  
20  
21  
22 83 investigation of the maximum tolerable sun glare determined that glare occurs when  
23  
24  
25 84 at specific angular distances between a driver's line of sight and the sun; these angular  
26  
27  
28 85 distances are 19° for a 40-year-old driver and 25° for a 60-year-old driver. Anue<sup>10</sup>  
29  
30  
31 86 suggested that sun glare typically does not occur at angular distances greater than 25°.  
32  
33

34 87 Several studies have investigated whether a direct relationship exists between sun  
35  
36  
37 88 glare and crashes by using data from police reports or hospitals. In a longitudinal  
38  
39  
40 89 study of patients who had been hospitalised because of a motor-vehicle crash,  
41  
42  
43 90 Redelmeier and Raza<sup>11</sup> concluded that bright sunlight was associated with an  
44  
45  
46 91 increased risk of life-threatening crashes in Canada. By analysing police-reported  
47  
48  
49 92 crash data from Arizona, Mitra and Washington<sup>12</sup> indicated that sun glare was a  
50  
51  
52 93 crucial overlooked variable that could explain intersection crashes and that including  
53  
54  
55 94 this variable improved the explanatory power of statistical models. By linking  
56  
57  
58 95 police-reported crash data from Arizona with sunrise and sunset data from the  
59  
60

1  
2  
3  
4 96 National Oceanic Atmospheric Administration (NOAA), Mitra<sup>3</sup> concluded that the  
5  
6  
7 97 odds of glare causing a crash were higher on roadways running eastbound and  
8  
9  
10 98 westbound than those running northbound and southbound. Mitra<sup>3</sup> further indicated  
11  
12  
13 99 that rear-end and angle crashes at signalised intersections were affected by sun glare,  
14  
15  
16 100 but that the severity of motorist injury was unaffected by sun glare.

17  
18  
19 101 By analysing the traffic-crash database of Chiba, Japan, Hagita and Mori<sup>13</sup> revealed  
20  
21  
22 102 that crashes involving pedestrians or bicycles at intersections were more likely when  
23  
24  
25 103 the sun was below 45° above the horizon in the driving direction. Sun et al.,<sup>14</sup>  
26  
27  
28 104 analysed police-reported crash data in Edmonton, Alberta, Canada, reported similar  
29  
30  
31 105 findings, concluding that sun glare significantly contributed to crash occurrence,  
32  
33  
34 106 especially at intersections. Furthermore, they indicated that the effect of sun glare on  
35  
36  
37 107 crash occurrence during mornings on eastbound roads and evenings on westbound  
38  
39  
40 108 roads is significantly greater during the spring and autumn months and that certain  
41  
42  
43 109 crash types (e.g., crashes related to signal violation, failure to yield to  
44  
45  
46 110 pedestrians/cyclists, and improper turning and lane changing) are more likely during  
47  
48  
49 111 periods of sun glare. By analysing police-reported crash data, Choi and Singh<sup>15</sup>  
50  
51  
52 112 revealed that, when compared to other age groups, elderly motorists tend to have a  
53  
54  
55 113 greater propensity for striking other vehicles in conditions of sun glare, especially on  
56  
57  
58 114 roadways that are not physically divided.

1  
2  
3  
4 115 According to our literature review, a significant gap remains in the understanding  
5  
6  
7 116 of the relationship between sun glare and pedestrian fatalities, conditional upon a  
8  
9  
10 117 pedestrian occurring. The primary research hypothesis of the present study was that  
11  
12  
13 118 pedestrian injury severity increases as visibility decreases (i.e., during sun glare). This  
14  
15  
16 119 study therefore investigated whether sun glare is associated with pedestrian fatalities.  
17  
18  
19 120 This study also examined the determinants of pedestrian fatalities in crashes related to  
20  
21  
22 121 sun glare.  
23  
24

25 122

## 28 123 **MATERIALS AND METHODS**

### 31 124 **Data source**

34 125 By using the Taiwan National Traffic Crash Dataset as well as sunrise and sunset  
35  
36  
37 126 data from the NOAA for the period from 2003 to 2016 (National Oceanic Earth  
38  
39  
40 127 System Research Laboratory and Atmospheric Administration,<sup>16</sup> accessed:  
41  
42  
43 128 2018-08-22), the current study examined the effect of sun glare on pedestrian  
44  
45  
46 129 fatalities, given that a crash involving a vehicle and pedestrian has occurred. The  
47  
48  
49 130 Taiwan National Traffic Crash Dataset comprises two types of file: crash files and  
50  
51  
52 131 vehicle and victim files. Crash files contain general information on the times and  
53  
54  
55 132 dates of crashes, as well as weather, road conditions, lighting conditions, and road  
56  
57  
58 133 types. Vehicle and victim files contain vehicle-related information, such vehicle type,  
59  
60

1  
2  
3  
4 134 manoeuvres, first point of impact, and orientation, as well as driver and casualty  
5  
6  
7 135 information, such as age, sex, and injury severity. Injury severity is classified into one  
8  
9  
10 136 of two levels: fatality or injury. Victims who die within 24 h as a result of a crash are  
11  
12  
13 137 classified as fatalities, whereas victims who sustain injuries, whether mild or severe,  
14  
15  
16 138 are classified as cases of injury.

19 139 Daily sunrise and sunset times and orientation are available from the NOAA. The  
20  
21  
22 140 sunrise and sunset orientation data for Taiwan are presented in online supplementary  
23  
24  
25 141 Appendix 1. By using the data on the temporal characteristics (i.e., time and date) and  
26  
27  
28 142 orientation of vehicle crashes from the Taiwan National Traffic Crash Dataset,  
29  
30  
31 143 pedestrian crashes were matched with the sunrise and sunset data of the NOAA and  
32  
33  
34 144 subsequently classified into glare-related or non-glare-related crashes. The  
35  
36  
37 145 Institutional Review Board affiliated with Taipei Medical University approved our  
38  
39  
40 146 study (IRB#: N201808071). Personal identification data, such as name or  
41  
42  
43 147 identification number, are not available in the dataset.

46 148 A glare-related crash was defined as a crash in which the following two conditions  
47  
48  
49 149 were satisfied: the car was travelling in a direction towards the sunrise or sunset and  
50  
51  
52 150 the angular distance between the driver's line of sight and the sun was between 0° and  
53  
54  
55 151 45°. Data on a vehicle's travel orientation (north, south, east, or west) are available  
56  
57  
58 152 from the National Traffic Crash Dataset, and data on sun orientation are available  
59  
60

1  
2  
3  
4 153 from the NOAA. The angular distances were adjusted according to the time of the  
5  
6  
7 154 crash (available from the National Traffic Crash Dataset) and daily sunrise and sunset  
8  
9  
10 155 times (available from the NOAA).

11  
12  
13 156 For example, according to the Taiwan National Traffic Crash Dataset, a car–  
14  
15  
16 157 pedestrian crash occurred in Hsinchu City, where a car heading northeast collided  
17  
18  
19 158 with a pedestrian at 06:18 on 18 June, 2016. Angular distances from 0° to 45° were  
20  
21  
22 159 reported<sup>13</sup> to cause sun glare and potentially affect traffic safety in Japan. We adopted  
23  
24  
25 160 these same angular distances as the threshold for defining a glare-related crash.  
26  
27  
28 161 According to the NOAA website, for this particular (18 June, 2016) and location  
29  
30  
31 162 (Hsinchu City with latitude of 24.778°N and longitude of 120.988°E), the sun rose  
32  
33  
34 163 from northeast, and the sunrise and sunset times were at 05:07 and 18:47,  
35  
36  
37 164 respectively. The daytime length for this particular day was 13 h and 40 min,  
38  
39  
40 165 equivalent to 820 min. The angular distances for sunrise and sunset are 0–180°,  
41  
42  
43 166 respectively; on this particular day, the sun moved 0.2195° every minute ( $180/820 =$   
44  
45  
46 167  $0.2195$ ). The adopted angular distance of 45° is equivalent to 205 min ( $45/0.2195 =$   
47  
48  
49 168  $205$ ); therefore, the glare times transformed from the angular distances of 0°–45° for  
50  
51  
52 169 this particular crash can be between 05:07 and 08:32 (range of 205 min). This  
53  
54  
55 170 particular crash was therefore classified as a glare-related crash because the car was  
56  
57  
58 171 headed northeast (which was the direction of the sunrise) and the time of the crash  
59  
60



1  
2  
3  
4 172 (06:18) was associated with an angular distance within  $0^{\circ}$ – $45^{\circ}$  (i.e. times between  
5  
6  
7 173 05:07 and 08:32).  
8  
9

10 174 A flow-chart of the sample selection from the Taiwan Traffic Crash Dataset for  
11  
12  
13 175 the period from 2003 to 2016 is presented in online supplementary Appendix 2. A  
14  
15  
16 176 total of 195,258 pedestrian casualties from traffic crashes during this period were  
17  
18  
19 177 selected from the dataset. In our sample, each pedestrian was counted. Only crashes  
20  
21  
22 178 involving a single pedestrian were considered in this study; crashes involving two or  
23  
24  
25 179 more pedestrians (accounting for 0.12% of all pedestrian crashes) were excluded. This  
26  
27  
28 180 study also considered only pedestrian crashes in which the crash partner was a  
29  
30  
31 181 motorcycle, car, taxi, or heavy vehicle (e.g. bus or coach). Crashes that occurred  
32  
33  
34 182 during adverse weather conditions, such as rain, fog, or clouds, were excluded (n =  
35  
36  
37 183 45,712). A total of 917 cases had missing data with regard to date, time, or vehicle  
38  
39  
40 184 orientation. Because these cases (adverse weather conditions and missing data) were  
41  
42  
43 185 not mutually exclusive, the total number of cases excluded was 45,365, yielding a  
44  
45  
46 186 total of 149,839 valid cases of pedestrian casualties. These valid cases were matched  
47  
48  
49 187 with the NOAA sunrise and sunset data.

50  
51  
52 188 After crashes that had occurred after sunset or before sunrise (n = 49,428) were  
53  
54  
55 189 excluded, 100,411 cases of pedestrian casualties remained. Of the 100,411 pedestrians  
56  
57  
58 190 that were matched with the sunrise and sunset data from the NOAA, 13,355 were  
59  
60

1  
2  
3  
4 191 glare-related cases (treated as cases), and 87,056 were non-glare-related cases (treated  
5  
6  
7 192 as controls).  
8  
9

10 193

#### 13 194 **Definition of variables**

16 195 The following demographic data were collected regarding the pedestrians in cases  
17  
18  
19 196 of casualties: sex, age (four groups: <18, 18–40, 41–64, and  $\geq 65$  years), alcohol use  
20  
21  
22 197 (yes: breathalyser test results of  $\geq 0.15$  mg/L or blood-alcohol concentration [BAC]  
23  
24  
25 198 level  $> 0.03\%$ ; no: breathalyser test results  $< 0.15$  mg/L or BAC level  $\leq 0.03\%$ ),  
26  
27  
28 199 licence status (licensed: with a valid licence; unlicensed: without a valid licence), and  
29  
30  
31 200 pedestrian crossing manner (facing traffic: pedestrians walking towards traffic; back  
32  
33  
34 201 to traffic: pedestrians walking with their backs to traffic; crossing: pedestrians  
35  
36  
37 202 crossing the street).  
38  
39

40 203 In Taiwan, those under the age of 18 are identified as teenagers who are unable to  
41  
42  
43 204 legally ride motorcycles or drive cars. Those aged 65 years or older were identified as  
44  
45  
46 205 elderly individuals. The remaining individuals aged 18–64 were classified into two  
47  
48  
49 206 even age intervals: 18–40 and 41–64 years. BAC data were obtained by police who  
50  
51  
52 207 conducted breathalyser tests or who ordered follow-up blood tests at hospitals.  
53  
54  
55 208 According to Taiwanese law, drivers with either breathalyser test  $\geq 0.15$  mg/L or  
56  
57  
58 209 BAC level  $> 0.03\%$  are considered to be drink driving. Data from breathalyser tests or  
59  
60

1  
2  
3  
4 210 BAC levels were available only for motorists and not for pedestrians because, by law,  
5  
6  
7 211 only motorists involved in crashes are required to be tested for alcohol consumption.  
8  
9

10 212 The vehicle attribute considered was the crash partner (motorcycle, car, taxi, or  
11  
12  
13 213 heavy vehicle, such as a bus or coach). The following road factors were considered:  
14  
15  
16 214 sun glare (yes: affected by sun glare; no: unaffected by sun glare) and crash location  
17  
18  
19 215 (rural: roadways with speed limits of  $\geq 51$ km/h; urban: roadways with speed limits of  
20  
21  
22 216  $\leq 50$ km/h). Two temporal factors, the month of the crash (spring/summer: March–  
23  
24  
25 217 August; autumn/winter: September–February) and days of the crash (weekday:  
26  
27  
28 218 Monday–Friday; weekend: Saturday or Sunday), were examined.  
29  
30

31 219

### 32 33 34 220 **Patient and public involvement**

35  
36  
37 221 The current research analysed national police-reported crash data as well as sunrise  
38  
39  
40 222 and sunset data from the NOAA, which are anonymised datasets. Neither patients nor  
41  
42  
43 223 the public were involved in this study.  
44  
45

46 224

### 47 48 49 225 **Statistical analysis**

50  
51  
52 226 The distribution of pedestrian injury severity according to a set of variables (i.e.  
53  
54  
55 227 human attributes, environmental factors, and vehicle characteristics) is reported in this  
56  
57  
58 228 study. Chi-square tests were conducted to examine the association between the  
59  
60

1  
2  
3  
4 229 independent variables and pedestrian injury severity. Because the dependent variable  
5  
6  
7 230 was binary (fatality vs. injury), binary mixed logit models, which allow parameter  
8  
9  
10 231 coefficients to have distributions rather than be fixed across individuals, were  
11  
12  
13 232 estimated. The variables discovered through chi-squared testing to be associated with  
14  
15  
16 233 the outcome ( $p < 0.2$ ) were then incorporated into multivariate mixed logit models. To  
17  
18  
19 234 detect multi-collinearity among the variables (all categorical), a chi-square  
20  
21  
22 235 independent test was conducted, and Cramer's  $V^{17}$  was estimated. To determine  
23  
24  
25 236 whether sun glare was associated with pedestrian fatalities, one overall model that  
26  
27  
28 237 included sun glare as one of the variables was utilised. One additional model with  
29  
30  
31 238 interaction terms of sun glare with other variables was subsequently estimated.

32  
33  
34 239 Mixed logit models were estimated to account for unobserved heterogeneity that  
35  
36  
37 240 may have arisen because of unmeasured variables, such as risk perception,  
38  
39  
40 241 behavioural factors, and other socioeconomic factors not available in the  
41  
42  
43 242 police-reported crash data. One example of a behavioural factor is distraction by  
44  
45  
46 243 phone use that may result in risk-taking inclinations and consequently an increased  
47  
48  
49 244 risk of injury.<sup>18 19</sup> Ignoring the effects of unobserved variables may lead to  
50  
51  
52 245 inconsistent estimates in all statistical models.<sup>20</sup>

53  
54  
55 246 In the present study, the utility of the injury severity  $i$  for a crash  $n$  was defined as  
56  
57  
58 247 follows:

1  
2  
3  
4 248  $IS_{in} = \beta_n X_{in} + \varepsilon_{in}$  Eq. (1)  
5  
6  
7

8  
9  
10  
11  
12  
13  
14  
15  
16  
17  
18  
19  
20  
21  
22  
23  
24  
25  
26  
27  
28  
29  
30  
31  
32  
33  
34  
35  
36  
37  
38  
39  
40  
41  
42  
43  
44  
45  
46  
47  
48  
49  
50  
51  
52  
53  
54  
55  
56  
57  
58  
59  
60

249

250 where  $IS_{in}$  is an injury-severity function determining the injury-severity category  $i$   
251 (fatal or injury) for an individual pedestrian  $n$ ;  $X_{in}$  is a vector of the observed  
252 variables, such as pedestrian and driver attributes, vehicle characteristics, and  
253 environmental or temporal variables,  $\beta_n$  is a vector of the parameters associated with  
254  $X_{in}$ ; and  $\varepsilon_{in}$  is the error term. The mixed logit model uses  $\beta_n$  as a vector of estimable  
255 parameters, which vary among pedestrians. The variation is observed with density  
256  $f(\beta/\theta)$ , where  $\theta$  is a vector of the parameters of the density distribution. In most  
257 applications, mixed models specify that the density  $f$  has a continuous distribution,  
258 such as a normal, lognormal, triangular, or uniform distribution.

259 Given error terms that are independent and identically Gumbel distributed<sup>21</sup>, the  
260 unconditional probability of one alternative  $i$  (from the set of injury-severity  
261 categories  $I$ ) is the integral of the conditional probability with a multinomial logit  
262 form over the parameter  $\beta$  of density  $f$ :

263

264 
$$P_{in} = \left( \frac{\exp(\beta' X_{in})}{\sum_{j=1}^I 1 + \exp(\beta' X_{nj})} \right) f(\beta|\theta) d\beta$$
 Eq. (2)  
265  
266

267 All parameters are initially assumed to be random; then, their estimated standard

268 deviations are evaluated using a zero-based (asymptotic) *t* test for each parameter.

269 One study<sup>20</sup> pointed out that a simulation-based maximum likelihood with 200 Halton

270 draws may provide a more efficient distribution of draws for numerical integration

271 and requires fewer draws to achieve convergence. We attempted to increase the

272 number of Halton draws, and the results appeared stable with the use of 1000 Halton

273 draws.

274

## 275 RESULTS

276

277 Table 1 lists the distribution of pedestrian injury severity according to a set of

278 variables. Of the 13,355 glare-related cases, 329 pedestrians (2.46%) sustained fatal

279 injuries, which is higher than those in non-glare-related crashes (1.83%). Majority of

280 pedestrian crashes involved motorists with valid licences (85.65%), sober motorists

281 (85.97%), urban roadways (89.57%), pedestrians who were hit while crossing the

282 street (65.85%), or non-glare conditions (86.70%) or occurred on weekdays (74.83%).

283

284 Table 1: Distribution of pedestrian injury severity according to a set of variables for

285 the period 2003–2016.

|           | N            | Fatality<br>n(%) | Injury<br>n(%) | $\chi^2$ test<br>p-value |
|-----------|--------------|------------------|----------------|--------------------------|
| Total     | 100411       | 1925(1.92)       | 98486(98.08)   |                          |
| Sun glare |              |                  |                |                          |
| Yes       | 13355(13.30) | 329(2.46)        | 13026(97.54)   | <0.01                    |

|                        | N            | Fatality<br>n(%) | Injury<br>n(%) | $\chi^2$ test<br>p-value |
|------------------------|--------------|------------------|----------------|--------------------------|
| No                     | 87056(86.70) | 1596(1.83)       | 85460(98.17)   |                          |
| Pedestrian gender      |              |                  |                |                          |
| Male                   | 50942(50.73) | 1015(1.99)       | 49927(98.01)   | 0.08                     |
| Female                 | 49469(49.27) | 910(1.84)        | 48559(98.16)   |                          |
| Driver gender          |              |                  |                |                          |
| Male                   | 53351(53.13) | 1132(2.12)       | 52219(97.88)   | <0.01                    |
| Female                 | 47060(46.87) | 793(1.69)        | 46267(98.31)   |                          |
| Pedestrian age (years) |              |                  |                |                          |
| <18                    | 3644(3.63)   | 67(1.84)         | 3577(98.16)    | <0.01                    |
| 18-40                  | 25851(25.75) | 154(0.60)        | 25697(99.40)   |                          |
| 41-64                  | 31283(31.15) | 352(1.13)        | 30931(98.87)   |                          |
| $\geq 65$              | 39633(39.47) | 1352(3.41)       | 38281(96.59)   |                          |
| Driver age (years)     |              |                  |                |                          |
| <18                    | 4458(4.44)   | 103(2.31)        | 4355(97.69)    | <0.01                    |
| 18-40                  | 25808(25.70) | 295(1.14)        | 25513(98.86)   |                          |
| 41-64                  | 32523(32.39) | 474(1.46)        | 32049(98.54)   |                          |
| $\geq 65$              | 37622(37.47) | 1033(2.75)       | 36589(97.25)   |                          |
| Driver licence         |              |                  |                |                          |
| Licensed               | 86007(85.65) | 1609(1.87)       | 84398(98.13)   | 0.01                     |
| Unlicensed             | 14404(14.35) | 316(2.19)        | 14088(97.81)   |                          |
| Alcohol use for driver |              |                  |                |                          |
| No                     | 86322(85.97) | 1512(1.75)       | 84810(98.25)   | <0.01                    |
| Yes                    | 14089(14.03) | 413(2.93)        | 13676(97.07)   |                          |
| Seasons                |              |                  |                |                          |
| Spring/summer          | 47671(47.48) | 914(1.92)        | 46757(98.08)   | 0.99                     |
| Autumn/winter          | 52740(52.52) | 1011(1.92)       | 51729(98.08)   |                          |
| Crash location         |              |                  |                |                          |
| Rural                  | 10475(10.43) | 352(3.36)        | 10123(96.64)   | <0.01                    |
| Urban                  | 89936(89.57) | 1573(1.75)       | 88363(98.25)   |                          |
| Crash partner          |              |                  |                |                          |
| Motorcycle             | 33221(33.09) | 643(1.94)        | 32578(98.06)   | <0.01                    |
| Car                    | 45963(45.77) | 801(1.74)        | 45162(98.26)   |                          |
| Taxi                   | 9655(9.62)   | 208(2.15)        | 9447(97.85)    |                          |
| Heavy vehicle          | 11572(11.52) | 356(3.08)        | 11216(96.92)   |                          |
| Pedestrian movement    |              |                  |                |                          |
| Facing traffic         | 9704(9.66)   | 172(1.77)        | 9532(98.23)    | <0.01                    |

|                 | N            | Fatality<br>n(%) | Injury<br>n(%) | $\chi^2$ test<br>p-value |
|-----------------|--------------|------------------|----------------|--------------------------|
| Back to traffic | 24584(24.48) | 623(2.53)        | 23961(97.47)   |                          |
| Crossing        | 66123(65.85) | 1130(1.71)       | 64993(98.29)   |                          |
| Car manoeuvre   |              |                  |                |                          |
| Straight        | 50836(50.63) | 862(1.70)        | 49974(98.30)   | <0.01                    |
| Changing lane   | 15625(15.56) | 257(1.64)        | 15368(98.36)   |                          |
| Overtaking      | 21339(21.25) | 601(2.82)        | 20738(97.18)   |                          |
| Turning         | 12611(12.56) | 205(1.63)        | 12406(98.37)   |                          |
| Sunset          |              |                  |                |                          |
| Sunset          | 8325(8.29)   | 214(2.57)        | 8109(97.41)    | <0.01                    |
| Other times     | 87056(86.70) | 1596(1.83)       | 85460(98.17)   |                          |
| Sunrise         | 5030(5.01)   | 115(2.29)        | 4915(97.71)    |                          |
| Weekdays        |              |                  |                |                          |
| Weekday         | 70366(70.08) | 1267(1.80)       | 69099(98.20)   | <0.01                    |
| Weekend         | 30045(29.92) | 658(2.19)        | 29387(97.81)   |                          |

286

287 Through chi-square testing, the following variables were determined to be  
 288 associated with the outcome: sun glare; pedestrian and driver sex and age; driver  
 289 license possession and alcohol consumption; crash month, location, and partner;  
 290 pedestrian movement; car manoeuvre; sunset hours; and day of the week. These  
 291 factors were then incorporated into the mixed logit models.

292 Table 2 presents the estimation results of the mixed logit model of pedestrian  
 293 injury severity. We compared the Akaike Information Criterion (AIC) of the models  
 294 when determining the optimal distribution and determining whether parameters were  
 295 fixed or random; male motorists and heavy vehicles as crash partners were determined  
 296 to be random parameters, with a uniform distribution that appears to provide the best  
 297 statistical fit.



298

299 Table 2: Mixed logit model estimation results for pedestrian injury severity during the  
 300 period 2003–2016<sup>a</sup> (n = 100,411).

| Variable                                            | Parameter | Standard error | <i>t</i> -value |
|-----------------------------------------------------|-----------|----------------|-----------------|
| Fatal injury                                        |           |                |                 |
| Fixed parameters                                    |           |                |                 |
| Constant                                            | −0.531    | 0.215          | −2.47           |
| Glare-related crash                                 | 0.527     | 0.164          | 3.21            |
| Pedestrian facing traffic                           | −0.304    | 0.110          | −2.76           |
| Pedestrian aged 65+ years                           | 0.553     | 0.237          | 2.33            |
| Motorist aged 65+ years                             | 0.218     | 0.102          | 2.14            |
| Rural roadway                                       | 0.985     | 0.251          | 3.92            |
| Intoxicated motorist                                | 0.606     | 0.213          | 2.85            |
| Weekend                                             | 0.134     | 0.053          | 2.53            |
| Overtaking manoeuvre                                | 0.472     | 0.132          | 3.58            |
| Sunset                                              | 0.162     | 0.074          | 2.19            |
| Random parameters                                   |           |                |                 |
| Male motorist                                       | 0.324     | 0.139          | 2.33            |
| Standard deviation of distribution                  | 0.389     | 0.163          | 2.39            |
| Heavy vehicle partner                               | 0.274     | 0.110          | 2.49            |
| Standard deviation of distribution                  | 0.622     | 0.290          | 2.14            |
| Restricted log-likelihood (constant only): −8,267.1 |           |                |                 |
| Log-likelihood at convergence: −5,806.4             |           |                |                 |
| $\rho^2 = 0.298$                                    |           |                |                 |

301 <sup>a</sup> The outcome ‘injury’ is the baseline case with its parameters set at zero.

302

303 According to the results listed in Table 2, glare-related crashes contributed to  
 304 fatalities ( $t = 3.21$ ), and the estimated parameter was fixed across all observed  
 305 pedestrians (the AIC, when fixed, was smaller than when allowed to be random). The  
 306 parameter implies that glared-related crash was more likely to result in fatal injuries  
 307 among pedestrians than a non-glare-related crash. Other factors discovered to have  
 308 fixed effects on observed pedestrians and increase the likelihood of fatal injuries were

1  
2  
3  
4 309 pedestrians aged 65 years or older, motorists aged 65 years or older, rural roadways,  
5  
6  
7 310 intoxicated motorists, weekend days, overtaking manoeuvres, and sunset hours.  
8  
9

10 311 The parameter for the parameter of male motorist appeared to be random, having a  
11  
12  
13 312 normal distribution with a mean of 0.324 and standard deviation of 0.389 (see Table  
14  
15  
16 313 2), indicating that individual pedestrians being struck by male motorists had different  
17  
18  
19 314 parameters. Given the estimates (mean = 0.324, standard deviation = 0.389),  
20  
21  
22 315 approximately 79.8% of pedestrians had a higher probability of sustaining fatal  
23  
24  
25 316 injuries when all other variables remained constant. Another parameter found to have  
26  
27  
28 317 a random effect across the sample of pedestrians was the variable of a heavy vehicle  
29  
30  
31 318 as the crash partner (with a normal distribution). This parameter had a mean of 0.274  
32  
33  
34 319 and standard deviation of 0.622 (see Table 2), indicating that individual pedestrians  
35  
36  
37 320 struck by heavy vehicles have different parameters, with 67.0% of the distributions  
38  
39  
40 321 resulting in a positive parameter (increasing the likelihood of fatal injuries) and 33.0%  
41  
42  
43 322 resulting in negative parameter (decreasing the likelihood of fatal injuries).  
44  
45

46 323 The direction of travel of pedestrians relative to vehicular traffic was also  
47  
48  
49 324 discovered to affect pedestrian fatalities ( $t = -2.76$ ). This fixed parameter suggests  
50  
51  
52 325 that pedestrians who faced traffic while walking were less likely to sustain fatal  
53  
54  
55 326 injuries than were those making other movements, such as walking with their backs to  
56  
57  
58 327 traffic or crossing the street.  
59  
60

1  
2  
3  
4 328 Table 3 presents the estimation results of the mixed logit model of pedestrian  
5  
6  
7 329 injury severity specifically in glare-related crashes. For this model, the only random  
8  
9  
10 330 parameter (with a uniform distribution) was the variable of a heavy vehicle as the  
11  
12  
13 331 crash partner. The heterogeneous effect indicates that crashes involving heavy  
14  
15  
16 332 vehicles were associated with both higher and lower likelihoods of pedestrians  
17  
18  
19 333 sustaining fatal injuries. We speculate that this heterogeneous effect is caused by  
20  
21  
22 334 variance in the experience level among certain driver groups, with more experienced  
23  
24  
25 335 drivers exhibiting a decreased likelihood of causing fatal injuries. In other words,  
26  
27  
28 336 heavy vehicles are normally operated by professional drivers, with the majority of  
29  
30  
31 337 drivers in this group being men and middle-aged or older individuals. The  
32  
33  
34 338 heterogeneity of the heavy vehicle partner variable presented supporting estimating a  
35  
36  
37 339 mixed logit model of pedestrian injury severity because such effects are difficult to  
38  
39  
40 340 identify when using a logit framework with numerous interaction terms.

41  
42  
43 341  
44 342 Table 3: Mixed logit estimation results for pedestrian injury severity with interaction  
45 343 terms of glare-related crashes and other variables <sup>a</sup> (n = 100,411)

| Variable                                | Parameter | Standard error | t-value |
|-----------------------------------------|-----------|----------------|---------|
| Fatal injury                            |           |                |         |
| Fixed parameters                        |           |                |         |
| Constant                                | -0.324    | 0.139          | -2.33   |
| Male motorist                           | 0.193     | 0.069          | 2.80    |
| Sunset                                  | 0.274     | 0.089          | 3.08    |
| Pedestrian facing traffic × glare crash | -0.439    | 0.126          | -3.48   |
| Pedestrians aged 65+ years              | 0.533     | 0.210          | 2.54    |
| Motorists aged 65+ years × glare crash  | 0.432     | 0.143          | 3.02    |

|                                    |       |       |      |
|------------------------------------|-------|-------|------|
| Rural roadways × glare crash       | 0.684 | 0.190 | 3.60 |
| Intoxicated motorist               | 0.461 | 0.154 | 2.99 |
| Weekend                            | 0.157 | 0.075 | 2.09 |
| Overtaking manoeuvre               | 0.329 | 0.121 | 2.72 |
| Random parameter                   |       |       |      |
| Heavy vehicle as crash partner     | 0.248 | 0.089 | 2.78 |
| Standard deviation of distribution | 0.526 | 0.211 | 2.49 |

Restricted log-likelihood (constant only): -7,302.7

Log-likelihood at convergence: -5,054.6

$\rho^2=0.308$

344 <sup>a</sup> The outcome ‘injury’ constituted the baseline, with its parameters set at zero

345

346 This mixed logit model with interaction terms of glare crashes with other variables

347 highlights several crucial features of glare crashes. For example, several interaction

348 terms were discovered to affect fatalities and fixed across the observed pedestrians:

349 facing traffic × glare crash, elderly motorist × glare crash, and rural roadway × glare

350 crash. It appears that facing traffic in a glare-related crash is a protective factor

351 against pedestrian fatalities. Injuries to pedestrians were more likely to be fatal in

352 glare crashes in which the drivers were elderly. Furthermore, in glare crashes that

353 took place in a rural setting, injuries were more likely to be fatal than otherwise.

354

## 355 **DISCUSSIONS**

356

357 By using the National Traffic Crash Dataset and sunrise and sunset data from the

358 NOAA, the present study examined whether sun glare was associated with pedestrian

1  
2  
3  
4 359 fatalities involved in motor vehicle crashes. This research contributes to the growing  
5  
6  
7 360 literature on pedestrian safety as well as fills a major research gap regarding the effect  
8  
9  
10 361 of sun glare on pedestrian fatalities. Regarding methodological contributions, the  
11  
12  
13 362 proposed models offer methodological flexibility to identify individual-specific  
14  
15  
16 363 heterogeneity that may arise as a result of other unmeasured factors related to motorist  
17  
18  
19 364 experience or behaviour or geographic characteristics. When developing intervention  
20  
21  
22 365 strategies for improving pedestrian safety in sun-glare conditions, the heterogeneous  
23  
24  
25 366 effects of certain variables (which cannot be determined with traditional logit models)  
26  
27  
28 367 should be considered.

31 368 The empirical contributions of this research are those findings related to the  
32  
33  
34 369 factors affecting pedestrian fatalities. The identification of these risk factors may  
35  
36  
37 370 provide policy-makers with information crucial to establishing suitable policies and  
38  
39  
40 371 strategies that may reduce the risk of crashes or severity. The following findings merit  
41  
42  
43 372 further discussion.

46 373 Most drivers commute during hours of extreme sun glare. It is therefore not  
47  
48  
49 374 surprising that more crashes occur on roadways that experience a significant portion  
50  
51  
52 375 of traffic during peak morning (sunrise) and afternoon (sunset) hours. The adverse  
53  
54  
55 376 effect of sun glare on crash occurrence has been well documented in relevant  
56  
57  
58 377 literature.<sup>3 14</sup> However, Mitra<sup>3</sup> discovered that motorist injury severity was not  
59  
60

1  
2  
3  
4 378 increased in glare conditions, possibly as a consequence of reduced travel speed.<sup>8</sup>  
5  
6

7 379 Such a protective effect of sun glare against associated motorist injury severity does  
8  
9

10 380 not apply to pedestrians; our study concludes that glare conditions (as indicated in the  
11  
12

13 381 overall model) are associated with pedestrian fatalities.  
14  
15

16 382 In our study, the adverse effect of sun glare was greater on rural roadways where  
17  
18

19 383 crashes occur at higher speeds and motorists may not expect to encounter pedestrians  
20  
21

22 384 as often as they would on urban roadways. One commonly-adopted engineering  
23  
24

25 385 measure is the use of adjust message signs to warn drivers of the risk of sun glare at  
26  
27

28 386 times and locations (i.e. rural roadways) prone to sun glare.<sup>9</sup>  
29  
30

31 387 Mitra<sup>3</sup> noted that the odds of glare causing crashes at intersections were higher  
32  
33

34 388 during the morning hours and in autumn and winter months in Arizona, United States.  
35  
36

37 389 In our study, seasons had a negligible effect on pedestrian fatalities. Adding to the  
38  
39

40 390 research conducted by Hagita and Mori,<sup>22</sup> who concluded that the rate of pedestrian  
41  
42

43 391 crashes shortly after sunset was higher than that at any other time in Japan, our study  
44  
45

46 392 revealed that compared with sunrise, the adverse effect of sun glare on pedestrian  
47  
48

49 393 fatalities was greater during sunset in Taiwan. Therefore, sun glare during sunset  
50  
51

52 394 hours may not only increase pedestrian crashes, as indicated by Hagita and Mori<sup>22</sup>,  
53  
54

55 395 but also affect the resulting injury severity. Evening commutes are often risky due to  
56  
57

58 396 fatigue, distraction, or other factors unrelated to sun glare. In our study, injuries  
59  
60

1  
2  
3  
4 397 sustained by pedestrians were more likely to be fatal at sunset than any other daytime  
5  
6  
7 398 of day. Additional research is warranted to examine whether sun glare affects  
8  
9  
10 399 pedestrian fatalities in evening commuting crashes.

11  
12  
13 400 Studies have suggested that compared to sober motorists, intoxicated motorists are  
14  
15  
16 401 more likely to leave pedestrians unattended by leaving the crash scene, thereby  
17  
18  
19 402 increasing pedestrian injury severity. Furthermore, alcohol use has been discovered to  
20  
21  
22 403 lead to hit-and-runs at night and during the weekend.<sup>23 24</sup> Our study revealed that the  
23  
24  
25 404 combined effects of alcohol consumption and sun glare were associated with  
26  
27  
28 405 pedestrian fatalities. Similar to other studies,<sup>23 24</sup> our research highlights, in particular,  
29  
30  
31 406 the effect of motorist alcohol consumption on the likelihood of fatality and on the  
32  
33  
34 407 weekends.

35  
36  
37 408 Studies have consistently reported that elderly motorists are the group most  
38  
39  
40 409 affected by sun glare. For example, two simulation studies conducted by Gray and  
41  
42  
43 410 Regan<sup>6</sup> and Theeuwes et al.<sup>7</sup> reported that in conditions of sun glare, older drivers  
44  
45  
46 411 executing a turning manoeuvre demonstrated significantly greater reductions in safety  
47  
48  
49 412 margin than did younger drivers, and older drivers demonstrated the most significant  
50  
51  
52 413 decrease in the ability to successfully detect pedestrians. Studies analysing real-life  
53  
54  
55 414 police-reported crash data<sup>15</sup> have indicated that in conditions of sun glare, older  
56  
57  
58 415 drivers are more likely to strike other vehicles. Our study contributes to the literature  
59  
60

1  
2  
3  
4 416 on pedestrian safety by concluding that older motorists, when affected by sun glare,  
5  
6  
7 417 are likely to cause fatal injuries to pedestrians when crashes occur. Advance-warning  
8  
9  
10 418 signs or educational efforts to increase older drivers' awareness of sun-glare  
11  
12  
13 419 conditions may reduce the likelihood of vehicle crashes or pedestrian injury severity.  
14  
15

16 420 In our study, no discrepancy was found between injuries in spring/summer and  
17  
18  
19 421 autumn/winter. We speculate that this is primarily because the anticipated effect of  
20  
21  
22 422 sun glare in different seasons may be offset by, for example, typhoons that strike  
23  
24  
25 423 Taiwan in summer and northeast monsoon in winter. Our result differs from those  
26  
27  
28 424 from large country,<sup>3</sup> where the adverse effect of sun glare was found to be greater in  
29  
30  
31 425 autumn and winter months. Such studies have been conducted in large countries such  
32  
33  
34 426 as the United States, where the climate changes substantially across latitudes, whereas  
35  
36  
37 427 Taiwan is a small island where climate changes little throughout the country.  
38  
39

40 428 Considerable work has concluded that older pedestrians are more likely to be  
41  
42  
43 429 fatally or severely injured in crashes, both during daytime and night conditions.<sup>25</sup> Our  
44  
45  
46 430 research provides ample evidence to suggest that injuries sustained by older  
47  
48  
49 431 pedestrians in crashes caused by sun glare are more likely to be fatal than those  
50  
51  
52 432 sustained by younger pedestrians. Whether the reduced conspicuity of pedestrians  
53  
54  
55 433 (particularly older pedestrians) under conditions of sun glare (twilight) plays a role in  
56  
57  
58 434 this effect is uncertain. However, enhancing the conspicuity of pedestrians with the  
59  
60



1  
2  
3  
4 435 use of visibility aids, not only in night conditions<sup>26</sup> but also in twilight conditions,  
5  
6  
7 436 may be beneficial for reducing crash risk or severity.  
8  
9

10 437 Adding to the research conducted by Sun et al.,<sup>14</sup> who reported that crashes related  
11  
12  
13 438 to improper turning or lane changing were more likely to occur during periods of sun  
14  
15  
16 439 glare, the present study reveals an association between the execution of overtaking  
17  
18  
19 440 manoeuvres during periods of sun glare and pedestrian fatalities. Injuries sustained in  
20  
21  
22 441 crashes caused by vehicles executing overtaking manoeuvres are commonly severe  
23  
24  
25 442 because motorists must accelerate to overtake other vehicles. In Taiwan, it is common  
26  
27  
28 443 for motorists to execute overtaking manoeuvres by using roadway shoulders, where  
29  
30  
31 444 pedestrians walk. Motorists should be aware of the risk they pose to pedestrians when  
32  
33  
34 445 overtaking other vehicles, particularly during periods of sun glare.  
35  
36

37 446 Studies have reported that facing traffic is beneficial for preventing pedestrian  
38  
39  
40 447 crashes<sup>27</sup> and reducing the severity of related injuries.<sup>25</sup> Our study complements these  
41  
42  
43 448 studies by concluding that walking against traffic is associated with decreased injury  
44  
45  
46 449 severity. In these cases, pedestrians' forward views may be well lit and thus be more  
47  
48  
49 450 favourable for pedestrians than walking in other directions. Expressing the necessity  
50  
51  
52 451 of facing traffic while walking along a street, particularly in conditions of sun glare,  
53  
54  
55 452 should be supplemented with information regarding the related safety benefits.  
56  
57

58 453 Although it varied among the study pedestrians, being struck by heavy vehicles  
59  
60

1  
2  
3  
4 454 increased the likelihood of fatal injuries. Although this finding agrees with those of  
5  
6  
7 455 other studies,<sup>28 29</sup> we additionally concluded that the effect of heavy vehicles was  
8  
9  
10 456 greater in conditions of sun glare. Notably, drivers of heavy vehicles tend to be  
11  
12  
13 457 professional. It is unclear whether driving this particular group of vehicles, in  
14  
15  
16 458 combination with undertaking longer hours of travel compared with those undertaken  
17  
18  
19 459 by a car driver, makes such drivers more susceptible to problems related to sun glare  
20  
21  
22 460 than other drivers are. Educational efforts can be directed towards drivers of heavy  
23  
24  
25 461 vehicles regarding driver susceptibility to sun glare, particularly on roadways with  
26  
27  
28 462 pedestrians.

31 463 This study had the following research limitations. First, it did not consider the  
32  
33  
34 464 surrounding topography; motorists travelling through areas with buildings or  
35  
36  
37 465 mountains, may be less susceptible to sun glare because the sun is occluded. By  
38  
39  
40 466 analysing geographic and police report data, likely times and locations for sun glare  
41  
42  
43 467 can be predicted, and motorists can be well informed regarding where and when to  
44  
45  
46 468 expect sun glare. Furthermore, we classified crashes as being related to glare when the  
47  
48  
49 469 angular distance between the driver's line of sight and the sun was between 0° and  
50  
51  
52 470 45°, a threshold based on research in Japan.<sup>13</sup> Further research adopting more  
53  
54  
55 471 stringent thresholds of 10°, 20°, or 30° degrees or analysing the changes in this effect  
56  
57  
58 472 for motorists of different ages may attempt to compare their results with ours, as  
59  
60

1  
2  
3  
4 473 indicated by Jurado-Piña and Pardillo Mayora.<sup>9</sup>  
5  
6

7 474 Due to limited funding, we could link only the National Traffic Crash Dataset and  
8  
9  
10 475 NOAA data but not prehospital triage system or hospital data (e.g. the National  
11  
12  
13 476 Health Insurance Research Dataset: NHIRD). We recommend that future research  
14  
15  
16 477 link our data to clinical datasets that provide details on injuries (e.g. injured body  
17  
18  
19 478 regions, hospitalisation) other than the condition of fatalities examined in this study.  
20  
21

22 479 Sun glare is a combined spatiotemporal factor. To broaden our collective  
23  
24  
25 480 understanding of factors of pedestrian safety, collecting spatial and temporal data  
26  
27  
28 481 whenever possible is paramount. The empirical results obtained in this study may be  
29  
30  
31 482 unique to Taiwan because of its unique sunrise and sunset times and orientations. As a  
32  
33  
34 483 result, until additional analyses are conducted using data from other countries to  
35  
36  
37 484 determine whether sun glare is a salient factor of pedestrian fatalities, caution should  
38  
39  
40 485 be exercised in generalising our findings for application in other settings.  
41

42 486

43  
44 487 **Contributors:** HPM drafted and revised the manuscript and established the  
45  
46  
47 488 theoretical support for data analyses. PLC re-analysed the data and interpreted the  
48  
49  
50 489 results. SKC reviewed relevant literature and analysed the data. LHC analysed the  
51  
52  
53 490 data. VL edited the manuscript and reviewed relevant literature. CWP was responsible  
54  
55  
56 491 for study design, contributed to the analysing and interpretation of data, drafted the  
57  
58  
59 492 manuscript, and strengthened discussion and conclusion. The final version of the  
60

1  
2  
3  
4 493 manuscript was read and approved by all contributing authors.  
5  
6  
7 494  
8  
9

10 495 **Competing interests:** None declared.  
11  
12  
13 496  
14  
15

16 497 **Funding:** This study was financially supported by grants from the Ministry of  
17  
18  
19 498 Science and Technology, Taiwan (MOST 105-2221-E-038-013-MY3) and Yuan's  
20  
21  
22 499 General Hospital and Taipei Medical University (106YGH-TMU-07). The funders  
23  
24  
25 500 had no role in the design of the study, data collection and analysis, interpretation of  
26  
27  
28 501 data, or preparation of the manuscript. Václav Linkov was supported by the Ministry  
29  
30  
31 502 of Education, Youth and Sports within National Sustainability Programme I, a project  
32  
33  
34 503 of Transport R&D Centre (LO1610), on a research grant acquired from the  
35  
36  
37 504 Operational Programme Research and Development for Innovations  
38  
39  
40 505 (CZ.1.05/2.1.00/03.0064).  
41  
42  
43 506  
44  
45

46 507 **Data sharing statement:** Only citizens of Taiwan who fulfil the requirements of  
47  
48  
49 508 conducting research projects are eligible to apply to use the dataset. The use of dataset  
50  
51  
52 509 is limited to research purposes only. The authors had no special access privileges that  
53  
54  
55 510 others would not have.  
56  
57  
58 511  
59 512  
60

513 **Reference**

514

- 515 1. Owsley C, Mcgwin G Jr. Vision and driving. *Vision Research* 2010; 50(23):  
516 2348-2361.
- 517 2. Tversky A, Kahneman D. Judgment under uncertainty heuristics and biases.  
518 *Science* 1974; 185(4157): 1124-1131.
- 519 3. Mitra S. Sun glare and road safety: an empirical investigation of intersection  
520 crashes. *Safety Science* 2014; 70: 246-254.
- 521 4. Redelmeier DA, Tibshirani R. Why cars in the next lane seem to go faster.  
522 *Nature* 1999; 401: 35-36.
- 523 5. Redelmeier DA, Raza S. Optical illusions and life-threatening traffic crashes: a  
524 perspective on aerial perspective. *Medical Hypotheses* 2018; 114: 23-27.
- 525 6. Gray R, Regan D. Glare susceptibility test results correlate with temporal safety  
526 margin when executing turns across approaching vehicles in simulated low-sun  
527 conditions. *Ophthalmic and Physiological Optics* 2007; 27(5): 440-450.
- 528 7. Theeuwes J, Alferdinck JW, Perel M. Relation between glare and driving  
529 performance. *Human Factors* 2002; 44(1): 95-107.
- 530 8. Churchill AM, Tripodis Y, Lovell DJ. Sun glare impacts on freeway congestion:  
531 geometric model and empirical analysis. *Journal of Transportation Engineering*  
532 2012; 138: 1196-1204.
- 533 9. Jurado-Piña R, Pardillo Mayora JM. Methodology to predict driver vision  
534 impairment situations caused by sun glare. *Transportation Research Record:  
535 Journal of the Transportation Research Board* 2009; 2120:, 12-17.
- 536 10. Anue K. *Sun glare detection and visualization*. 2017. Master's degree in  
537 Computer Science. Department of Computer Science. Norwegian University of  
538 Science and Technology, 2017.
- 539 11. Redelmeier DA, Raza S. Life-threatening motor vehicle crashes in bright  
540 sunlight. *Medicine* 2017; 96(1): e5710.
- 541 12. Mitra S, Washington S. *On the significance of omitted variables in intersection  
542 crash modeling*. *Accident Analysis and Prevention* 2012; 49: 439-448.
- 543 13. Hagita K, Mori K. The effect of sun glare on traffic accidents in Chiba prefecture,  
544 Japan. *Asian Transport Studies* 2014; 3(2): 205-219.
- 545 14. Sun D, El-Basyouny K, Kwon TJ. Sun glare: Network characterization and  
546 safety effects. *Transportation Research Record: Journal of the Transportation  
547 Research Board* 2018.
- 548 15. Choi EH, Santokh S. *Statistical assessment of the glare issue – human and  
549 natural elements*. Proceeding of 2005 FCSM Conference, Federal Committee on  
550 Statistical Methodology, Arlington, VA, 2005; 1-8.

- 1  
2  
3  
4 551 16. National Oceanic Earth System Research Laboratory and Atmospheric  
5 552 Administration. <https://www.esrl.noaa.gov/gmd/grad/solcalc/> Accessed:  
6 553 2018-08-22.
- 7  
8 554 17. Mchugh ML. The chi-square test of independence. *Biochemia Medica* 2013;  
9 555 23(2): 143-149.
- 10  
11 556 18. Barbieri S, Vettore G, Pietrantonio V, Snenghi R, Tredese A, Bergamini M,  
12 557 Previato S, Stefanati A, Gaudio RM, Feltracco P. Pedestrian inattention  
13 558 blindness while playing Pokemon Go as an emerging health-risk behavior: a case  
14 559 report. *Journal of Medical Internet Research* 2017; 19(4): e86.
- 15  
16 560 19. Chen PL, Pai CW. Evaluating the effects of smartphone racing games and other  
17 561 game types on pedestrian's risk-taking inclinations. *Computers in Human*  
18 562 *Behavior* 2018; 88: 78-83.
- 19  
20 563 20. Bhat CR. Quasi-random maximum simulated likelihood estimation of the mixed  
21 564 multinomial logit model. *Transportation Research Part B: Methodological* 2001;  
22 565 35(7): 677-693.
- 23  
24 566 21. Manski CF, Mcfadden DL. *A structural analysis of discrete data with*  
25 567 *econometric applications*. The MIT Press, Cambridge, MA. 1981.
- 26  
27 568 22. Hagita K, Mori K. Traffic accident analysis of sun glare and twilight shortly  
28 569 before and after sunset in Chiba prefecture, Japan. *Journal of the Eastern Asia*  
29 570 *Society for Transportation Studies* 2015; 11: 1999-2014.
- 30  
31 571 23. Solnick SJ, Hemenway D. Hit the bottle and run: The role of alcohol in  
32 572 hit-and-run pedestrian fatalities. *Journal of Studies on Alcohol and Drugs* 1994;  
33 573 55(6): 679-684.
- 34  
35 574 24. Solnick SJ, Hemenway D. The hit-and-run in fatal pedestrian accidents: victims,  
36 575 circumstances and drivers. *Accident Analysis and Prevention* 1995; 27(5):  
37 576 643-649.
- 38  
39 577 25. Chen PL, Jou RC, Saleh W, Pai CW. Accidents involving pedestrians with their  
40 578 backs to traffic or facing traffic: an evaluation of crash characteristics and  
41 579 injuries. *Journal of Advanced Transportation* 2016; 50(5): 736-751.
- 42  
43 580 26. Kwan I, Mapstone J. Interventions for increasing pedestrian and cyclist visibility  
44 581 for the prevention of death and injuries. *Cochrane Database of Systematic*  
45 582 *Reviews* 2006; (4): CD003438.
- 46  
47 583 27. Luoma J, Peltola H. Does facing traffic improve pedestrian safety? *Accident*  
48 584 *Analysis and Prevention* 2013; 50: 1207-1210.
- 49  
50 585 28. Lefler DE, Gabler HC. The fatality and injury risk of light truck impacts with  
51 586 pedestrians in the united states. *Accident Analysis and Prevention* 2004; 36(2):  
52 587 295-304.
- 53  
54 588 29. Dong B, Ma X, Chen F. Analyzing the injury severity sustained by non-motorists  
55  
56  
57  
58  
59  
60

1  
2  
3  
4 589 at mid-blocks considering non-motorists' pre-crash behavior. *Transportation*  
5 590 *Research Record: Journal of the Transportation Research Board* 2018; 1-11.  
6 591  
7  
8 592  
9 593  
10  
11 594  
12 595  
13  
14 596  
15 597  
16  
17  
18  
19  
20  
21  
22  
23  
24  
25  
26  
27  
28  
29  
30  
31  
32  
33  
34  
35  
36  
37  
38  
39  
40  
41  
42  
43  
44  
45  
46  
47  
48  
49  
50  
51  
52  
53  
54  
55  
56  
57  
58  
59  
60

For peer review only

1  
2  
3  
4  
5  
6  
7  
8  
9  
10  
11  
12  
13  
14  
15  
16  
17  
18  
19  
20  
21  
22  
23  
24  
25  
26  
27  
28  
29  
30  
31  
32  
33  
34  
35  
36  
37  
38  
39  
40  
41  
42  
43  
44  
45  
46  
47  
48  
49  
50  
51  
52  
53  
54  
55  
56  
57  
58  
59  
60

Appendix 1: Directions of sunrise and sunset in Taiwan



66x49mm (300 x 300 DPI)



Appendix 2: Study flow chart

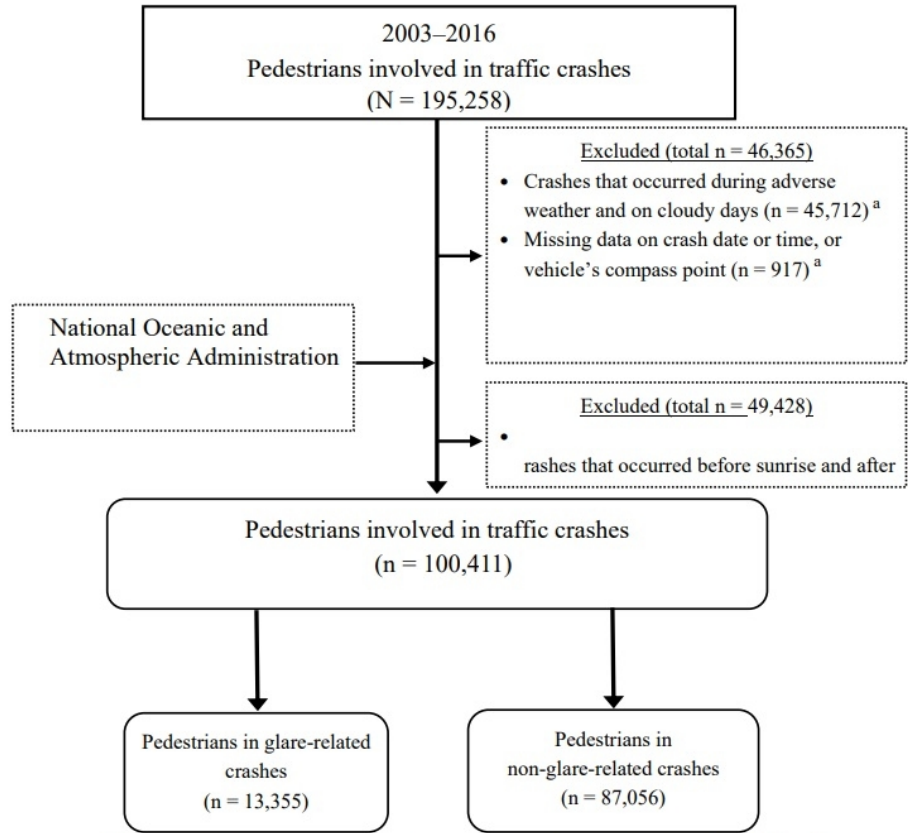

<sup>a</sup> Because these cases were not mutually exclusive, the total number of cases excluded was 45,365.

209x204mm (96 x 96 DPI)

**STROBE Statement**Checklist of items that should be included in reports of *case-control studies*

| Section/Topic                                                                                      | Item No | Recommendation                                                                                                                                                                             | Reported on Page No |
|----------------------------------------------------------------------------------------------------|---------|--------------------------------------------------------------------------------------------------------------------------------------------------------------------------------------------|---------------------|
| <b>Title and abstract</b>                                                                          | 1       | (a) Indicate the study's design with a commonly used term in the title or the abstract                                                                                                     | 1                   |
|                                                                                                    |         | (b) Provide in the abstract an informative and balanced summary of what was done and what was found                                                                                        | 2–3                 |
| <b>Introduction</b>                                                                                |         |                                                                                                                                                                                            |                     |
| Background/rationale                                                                               | 2       | Explain the scientific background and rationale for the investigation being reported                                                                                                       | 4–6                 |
| Objectives                                                                                         | 3       | State specific objectives, including any prespecified hypotheses                                                                                                                           | 7                   |
| <b>Methods</b>                                                                                     |         |                                                                                                                                                                                            |                     |
| Study design                                                                                       | 4       | Present key elements of study design early in the paper                                                                                                                                    | 8–10                |
| Setting                                                                                            | 5       | Describe the setting, locations, and relevant dates, including periods of recruitment, exposure, follow-up, and data collection                                                            | 8–12                |
| Participants                                                                                       | 6       | (a) <i>Cohort study</i> —Give the eligibility criteria, and the sources and methods of selection of participants. Describe methods of follow-up                                            | 7–9                 |
|                                                                                                    |         | <i>Case-control study</i> —Give the eligibility criteria, and the sources and methods of case ascertainment and control selection. Give the rationale for the choice of cases and controls |                     |
|                                                                                                    |         | <i>Cross-sectional study</i> —Give the eligibility criteria, and the sources and methods of selection of participants                                                                      |                     |
| Variables                                                                                          | 7       | (b) <i>Cohort study</i> —For matched studies, give matching criteria and number of exposed and unexposed                                                                                   | 11,12               |
|                                                                                                    |         | <i>Case-control study</i> —For matched studies, give matching criteria and the number of controls per case                                                                                 |                     |
| Data sources/measurement                                                                           | 8*      | Clearly define all outcomes, exposures, predictors, potential confounders, and effect modifiers. Give diagnostic criteria, if applicable                                                   | 11,12               |
| Bias                                                                                               | 9       | For each variable of interest, give sources of data and details of methods of assessment (measurement). Describe comparability of assessment methods if there is more than one group       | 9                   |
| Study size                                                                                         | 10      | Describe any efforts to address potential sources of bias                                                                                                                                  | 10                  |
| Quantitative variables                                                                             | 11      | Explain how the study size was arrived at                                                                                                                                                  | 10                  |
| Statistical methods                                                                                | 12      | Explain how quantitative variables were handled in the analyses. If applicable, describe which groupings were chosen and why                                                               | 11,12               |
|                                                                                                    |         | (a) Describe all statistical methods, including those used to control for confounding                                                                                                      | 12–15               |
|                                                                                                    |         | (b) Describe any methods used to examine subgroups and interactions                                                                                                                        | 12–15               |
|                                                                                                    |         | (c) Explain how missing data were addressed                                                                                                                                                | 12–15               |
|                                                                                                    |         | (d) <i>Cohort study</i> —If applicable, explain how loss to follow-up was addressed                                                                                                        | 12–15               |
| <i>Case-control study</i> —If applicable, explain how matching of cases and controls was addressed |         |                                                                                                                                                                                            |                     |
|                                                                                                    |         | <i>Cross-sectional study</i> —If applicable, describe analytical methods taking account of sampling strategy                                                                               |                     |
|                                                                                                    |         | (e) Describe any sensitivity analyses                                                                                                                                                      | N/A                 |

| Section/Topic            | Item No | Recommendation                                                                                                                                                                                               | Reported on Page No |
|--------------------------|---------|--------------------------------------------------------------------------------------------------------------------------------------------------------------------------------------------------------------|---------------------|
| <b>Results</b>           |         |                                                                                                                                                                                                              |                     |
| Participants             | 13*     | (a) Report numbers of individuals at each stage of study—eg numbers potentially eligible, examined for eligibility, confirmed eligible, included in the study, completing follow-up, and analysed            | 10                  |
|                          |         | (b) Give reasons for non-participation at each stage                                                                                                                                                         | 10                  |
|                          |         | (c) Consider use of a flow diagram                                                                                                                                                                           | Appendix 2          |
| Descriptive data         | 14*     | (a) Give characteristics of study participants (eg demographic, clinical, social) and information on exposures and potential confounders                                                                     | 10                  |
|                          |         | (b) Indicate number of participants with missing data for each variable of interest                                                                                                                          | 10                  |
|                          |         | (c) <i>Cohort study</i> —Summarise follow-up time (eg, average and total amount)                                                                                                                             | N/A                 |
| Outcome data             | 15*     | <i>Cohort study</i> —Report numbers of outcome events or summary measures over time                                                                                                                          | N/A                 |
|                          |         | <i>Case-control study</i> —Report numbers in each exposure category, or summary measures of exposure                                                                                                         | N/A                 |
|                          |         | <i>Cross-sectional study</i> —Report numbers of outcome events or summary measures                                                                                                                           | 15                  |
| Main results             | 16      | (a) Give unadjusted estimates and, if applicable, confounder-adjusted estimates and their precision (eg, 95% confidence interval). Make clear which confounders were adjusted for and why they were included | 15–21               |
|                          |         | (b) Report category boundaries when continuous variables were categorized                                                                                                                                    | N/A                 |
|                          |         | (c) If relevant, consider translating estimates of relative risk into absolute risk for a meaningful time period                                                                                             | N/A                 |
| Other analyses           | 17      | Report other analyses done—eg analyses of subgroups and interactions, and sensitivity analyses                                                                                                               | N/A                 |
| <b>Discussion</b>        |         |                                                                                                                                                                                                              |                     |
| Key results              | 18      | Summarise key results with reference to study objectives                                                                                                                                                     | 22–29               |
| Limitations              | 19      | Discuss limitations of the study, taking into account sources of potential bias or imprecision. Discuss both direction and magnitude of any potential bias                                                   | 27–29               |
| Interpretation           | 20      | Give a cautious overall interpretation of results considering objectives, limitations, multiplicity of analyses, results from similar studies, and other relevant evidence                                   | 27–29               |
| Generalisability         | 21      | Discuss the generalisability (external validity) of the study results                                                                                                                                        | 28–29               |
| <b>Other Information</b> |         |                                                                                                                                                                                                              |                     |
| Funding                  | 22      | Give the source of funding and the role of the funders for the present study and, if applicable, for the original study on which the present article is based                                                | 29                  |

\*Give information separately for cases and controls in case-control studies and, if applicable, for exposed and unexposed groups in cohort and cross-sectional studies.

**Note:** An Explanation and Elaboration article discusses each checklist item and gives methodological background and published examples of transparent reporting. The STROBE checklist is best used in conjunction with this article (freely available on the Web sites of PLoS Medicine at <http://www.plosmedicine.org/>, Annals of Internal Medicine at <http://www.annals.org/>, and Epidemiology at <http://www.epidem.com/>). Information on the STROBE Initiative is available at [www.strobe-statement.org](http://www.strobe-statement.org).
