# Supplementary material for: Population-based case–control study of the effect of sun glare on pedestrian fatalities in Taiwan
Source: PubMed Central journal article supplement — BMJ Open. 2019 Aug 27;9(8):e028350. doi: 10.1136/bmjopen-2018-028350 (PMC6720250; doi:10.1136/bmjopen-2018-028350), 2019-08-27
Supplement: bmjopen-2018-028350supp002.pdf [file bmjopen-2018-028350supp002.pdf]

## Appendix 2: Study flow chart

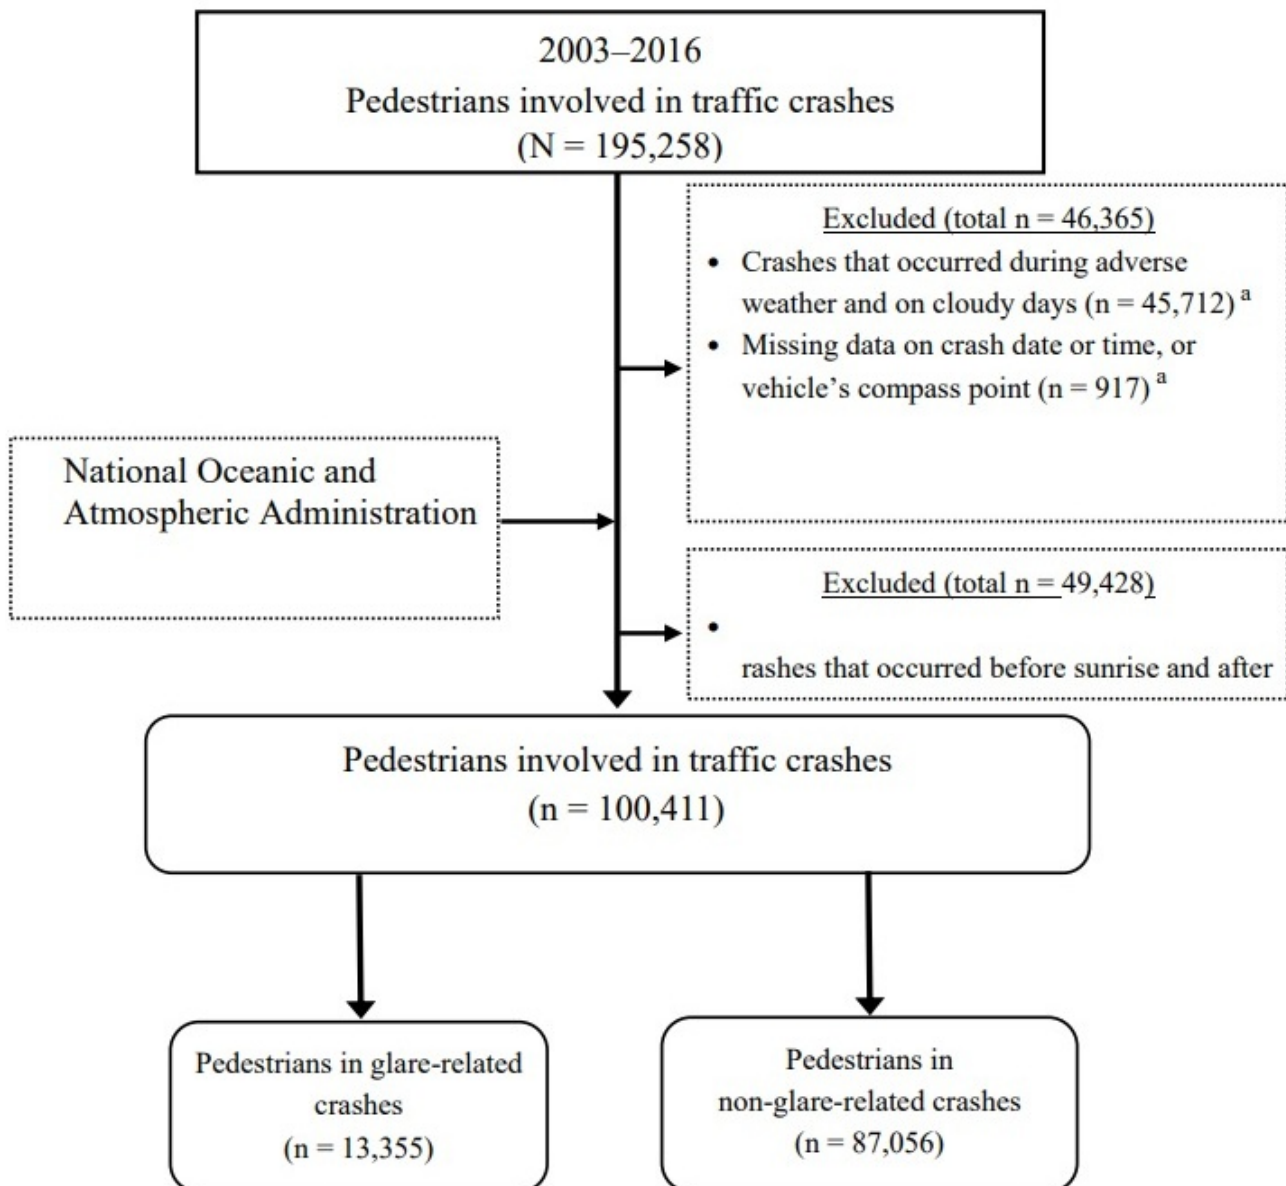

<sup>a</sup> Because these cases were not mutually exclusive, the total number of cases excluded was 45,365.
