# Supplementary figures and images for: Population-based case–control study of the effect of sun glare on pedestrian fatalities in Taiwan
Source: PubMed Central journal article supplement — BMJ Open. 2019 Aug 27;9(8):e028350. doi: 10.1136/bmjopen-2018-028350 (PMC6720250; doi:10.1136/bmjopen-2018-028350), 2019-08-27

## Appendix 1: Directions of sunrise and sunset in Taiwan

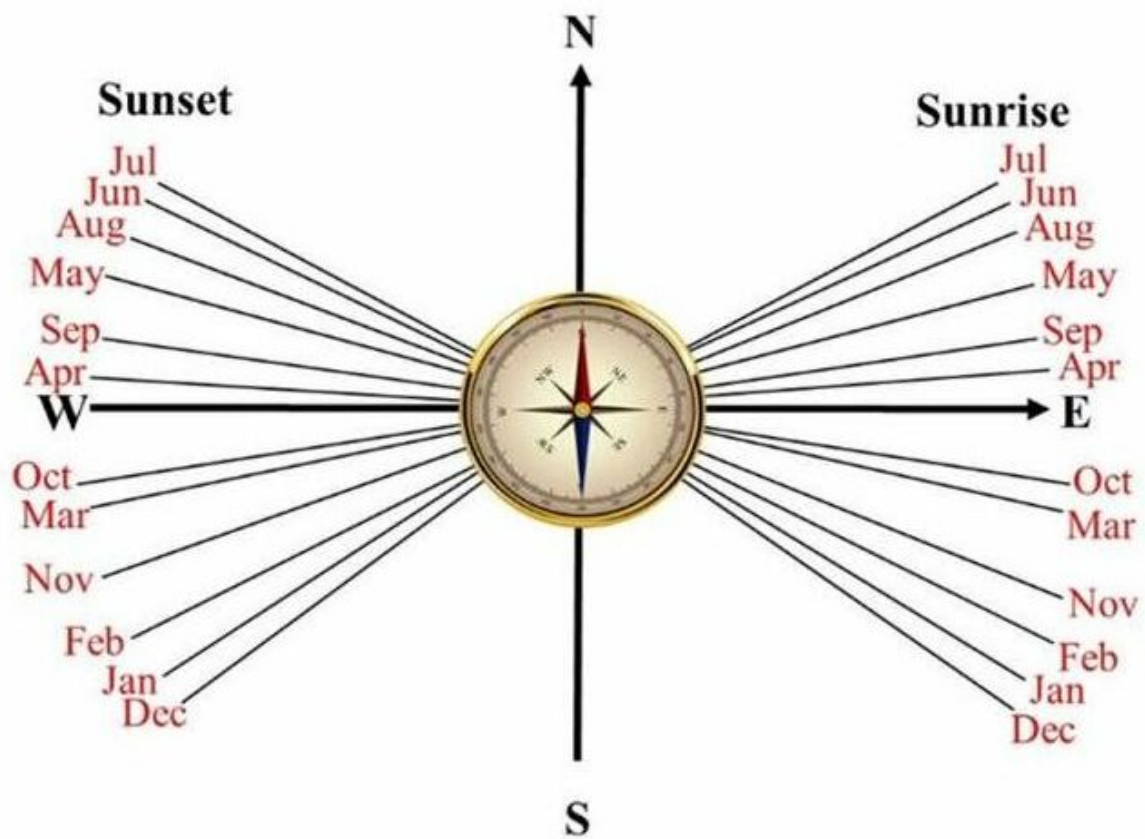

Supplement: bmjopen-2018-028350supp001.pdf [file bmjopen-2018-028350supp001.pdf]
